# Supplementary material for: Identification of Leishmania donovani Topoisomerase 1 inhibitors via intuitive scaffold hopping and bioisosteric modification of known Top 1 inhibitors
Source: PubMed Central journal article supplement (PMC4879574; doi:10.1038/srep26603), 2016-05-25

## **Identification of *Leishmania donovani* Topoisomerase 1 inhibitors via intuitive scaffold hopping and bioisosteric modification of known Top 1 inhibitors**

Rajinikanth Mamidala,<sup>2,5</sup> Papiya Majumdar,<sup>3</sup> Kunal Kumar Jha,<sup>1</sup> Chandramohan Bathula,<sup>1</sup> Rahul Agarwal,<sup>4</sup> M. Thirumala Chary,<sup>2</sup> H. K. Mazumdar,<sup>3</sup> Parthapratim Munshi<sup>1</sup> and Subhabrata Sen\*.<sup>1</sup>

<sup>1</sup> Department of Chemistry, School of Natural Sciences, Shiv Nadar University, Chithera, Dadri, Gautam Buddha Nagar 201314, Uttar Pradesh, India

<sup>2</sup> Department of Chemistry, Jawaharlal Nehru Technological University, Kukatpally, Hyderabad 500085, Telangana, India

<sup>3</sup> Institute of Chemical Biology, 4 Raja S.C. Mullick Road, Kolkata 700032, West Bengal, India

<sup>4</sup> Department of Life Sciences, School of Natural Sciences, Shiv Nadar University, Chithera, Dadri, Gautam Buddha Nagar 201314, Uttar Pradesh, India

<sup>5</sup> GVK Bioscience, 28 A, Nacharam, Hyderabad 500076, Telangana

## Contents

1. Materials and methods
  - a. Chemistry
    - i. General procedure for the synthesis of **1-21**
    - ii. Individual synthesis and analytical data
  - b. Molecular docking
    - i. Docking studies of camptothecin, edotecarin, compound **4** and **13** with HTop 1
    - ii. Docking studies of camptothecin, edotecarin, compound **4** and **13** with LdTop 1
2.  $^1\text{H}$  and  $^{13}\text{C}$ -NMR spectra

## Materials and methods

### Chemistry

All reactions were carried out in flame-dried sealed tubes with magnetic stirring. Unless otherwise noted, all experiments were performed under argon atmosphere. All reagents were purchased from Sigma Aldrich, Acros or Alfa Aesar. Solvents were treated with 4 Å molecular sieves or sodium and distilled prior to use. Purifications of reaction products were carried out by column chromatography using Chem Lab silica gel (230-400 mesh). Infrared spectra (IR) were recorded on a ThermoScientific Neoled IS5 FTIR spectrophotometer and are reported as wavelength numbers ( $\text{cm}^{-1}$ ). Infrared spectra were recorded by preparing a KBr pellet containing the title compound.  $^1\text{H}$  NMR and  $^{13}\text{C}$  NMR spectra were recorded with tetramethylsilane (TMS) as internal standard at ambient temperature unless otherwise indicated on a Varian 300/400 and JEOL JNM-ECX500 MHz at 500 MHz for  $^1\text{H}$  NMR and 100 MHz for  $^{13}\text{C}$  NMR. Chemical shifts are reported in parts per million (ppm) and coupling constants are reported as Hertz (Hz). Splitting patterns are designated as singlet (s), broad singlet (bs), doublet (d), triplet (t). Splitting patterns that could not be interpreted or easily visualized are designated as multiple (m). The Mass Spectrometry analysis was done on the 6540 UHD Accurate-Mass Q-TOF LC/MS system (Agilent Technologies) equipped with Agilent 1290 LC system obtained by the Dept. of Chemistry, School of Natural Sciences, Shiv Nadar University, Uttar Pradesh 203207, India.

### General procedure for the Knoevenagel condensation between 6-methylfuro[3,4-c]pyridine-3,4(1H,5H)-dione and appropriate aldehydes

The reactions were executed in a 24 carousel (15 mL volume) custom made reaction block. To a stirred solution of 6-methylfuro[3,4-c]pyridine-3,4(1H,5H)-dione (150 mg, 0.9 mmol) in ethanol (9 mL) added piperidine (7.5 mg, 0.09 mmol), followed by corresponding aldehyde (0.99 mmol) under  $\text{N}_2$  atmosphere at room temperature, then the reaction mixture stirred at  $80^\circ\text{C}$  for 16 h, allowed to cool to room temperature. The supernatant was removed and the resulting precipitate was washed twice with ethanol (10 mL X 2) and once with diethyl ether (10 mL). The solvent removal and washing was conducted in parallel in Tecan Evo Freedom machine. They were then dried in genevac to provide the desired derivatives of 6-methylfuro[3,4-c]pyridine-3,4(1H,5H)-dione (**1-21**).

(Z)-1-(2,4-dimethylbenzylidene)-6-methylfuro[3,4-c]pyridine-3,4(1H,5H)-dione (**1**)

Following the general protocol 2, 4-dimethylbenzaldehyde (134 mg, 0.99 mmol) afforded **1** in 127 mg (yield 48%). <sup>1</sup>H NMR (300 MHz; DMSO-d<sub>6</sub>): δ 12.21 (br. s, 1H), 7.81 (m, 1H), 7.23-7.19 (m, 1H); 7.17-7.15 (m, 1H); 6.98-6.85 (m, 2H), 2.36 (s, 3H), 2.35-2.34 (m, 6H). <sup>13</sup>C NMR (125 MHz; DMSO-d<sub>6</sub>): δ 164.84, 157.98, 156.65, 155.67, 143.16, 135.61, 135.39, 131.38, 130.95, 130.52, 109.28, 106.01, 97.79, 21.15, 19.92, 19.72. LCMS (ESI) m/z: [M + H]<sup>+</sup> calculated for (C<sub>17</sub>H<sub>16</sub>NO<sub>3</sub>) 282.11, found 282.27.

(Z)-1-(4-methoxy-2,3-dimethylbenzylidene)-6-methylfuro[3,4-c]pyridine-3,4(1H,5H)-dione (**2**)

Following the general protocol 4-methoxy-2, 3-dimethylbenzaldehyde (162 mg, 0.99 mmol) afforded **2** in 200 mg (yield 72%). <sup>1</sup>H NMR (300 MHz; DMSO-d<sub>6</sub>): δ 12.15 (br. s, 1H), 7.85-7.83 (d, *J* = 6 Hz, 1H), 7.01-6.95 (m, 3H); 3.81 (s, 3H), 2.27-2.26 (d, *J* = 3Hz, 6H), 2.18 (s, 3H). <sup>13</sup>C NMR (125 MHz; DMSO-d<sub>6</sub>): δ 164.90, 158.29, 156.71, 155.11, 141.76, 138.47, 129.06, 124.98, 123.96, 110.47, 108.88, 105.45, 97.42, 56.04, 20.38, 16.39, 12.32. LCMS (ESI) m/z: [M + H]<sup>+</sup> calculated for (C<sub>18</sub>H<sub>19</sub>NO<sub>4</sub>) 312.58, found 312.25.

(Z)-1-(2-trifluoromethylbenzylidene)-6-methylfuro[3,4-c]pyridine-3,4(1H,5H)-dione (**3**)

Following the general protocol 2-trifluoromethylbenzaldehyde (168 mg, 0.99 mmol) afforded **3** in 200 mg (yield 71%). <sup>1</sup>H NMR (300 MHz; DMSO-d<sub>6</sub>): δ 11.99-11.80 (br. s, 1H), 8.20-8.18 (d, *J* = 6 Hz, 1H), 7.86-7.78 (m, 2H), 7.61-6.58 (m, 1H), 6.85 (s, 1H), 6.80 (s, 1H), 2.34 (s, 3H). <sup>13</sup>C NMR (125 MHz; DMSO-d<sub>6</sub>): δ 164.19, 157.98, 157.02, 156.09, 145.45, 133.29, 132.57, 130.64, 129.69, 127.56, 127.31, 126.64, 106.59, 105.27, 97.52, 19.96. LCMS (ESI) m/z: [M + H]<sup>+</sup> calculated for (C<sub>16</sub>H<sub>11</sub>F<sub>3</sub>NO<sub>3</sub>) 322.06, found 322.00.

(Z)-1-(3,4-dihydroxybenzylidene)-6-methylfuro[3,4-c]pyridine-3,4(1H,5H)-dione (**4**)

Following the general protocol 3,4-dihydroxybenzaldehyde (136 mg, 0.99 mmol) afforded **4** in 132 mg (yield 53%). <sup>1</sup>H NMR (300 MHz; DMSO-d<sub>6</sub>): δ 7.39 (s, 1H), 7.16-7.05 (m, 1H), 6.80-6.75 (m, 2H), 6.72 (s, 1H), 2.28 (s, 3H). <sup>13</sup>C NMR (125 MHz; DMSO-d<sub>6</sub>): δ 168.75, 167.43, 164.90, 158.35, 156.71, 155.05, 148.29, 146.05, 140.58, 124.67, 124.40, 117.66, 116.45, 113.39,

109.28, 105.14, 99.84, 97.03, 68.28, 20.00, 19.65. LCMS (ESI) m/z:  $[M + H]^+$  calculated for (C<sub>15</sub>H<sub>12</sub>NO<sub>5</sub>) 286.06, found 386.00.

(Z)-1-((1H-indol-3-yl)methylene)-6-methylfuro[3,4-c]pyridine-3,4(1H,5H)-dione (**5**)

Following the general protocol 1H-indole-3-carbaldehyde (145 mg, 0.99 mmol) afforded **5** in 192 mg (yield 71%). <sup>1</sup>H NMR (500 MHz; DMSO-d<sub>6</sub>): δ 11.99 (br. s, 1H), 8.01 (m, 2H), 7.31-7.25 (m, 1H); 7.39 (s, 1H); 7.21-7.18 (m, 3H), 6.82 (s, 1H), 2.39 (s, 3H). <sup>13</sup>C NMR (125 MHz; DMSO-d<sub>6</sub>): δ 168.77, 167.41, 164.88, 158.56, 158.38, 155.79, 155.05, 154.35, 139.38, 136.44, 130.69, 126.96, 123.02, 121.01, 119.26, 112.72, 109.59, 109.29, 106.85, 104.80, 99.84, 96.94, 68.29, 19.99, 19.65. HRMS (ESI-TOF) m/z:  $[M + H]^+$  calculated for (C<sub>17</sub>H<sub>13</sub>N<sub>2</sub>O<sub>3</sub>) 293.08, found 293.00.

(Z)-1-(benzo[d][1,3]dioxol-5-ylmethylene)-6-methylfuro[3,4-c]pyridine-3,4(1H,5H)-dione (**6**)

Following the general protocol benzo[d][1,3]dioxole-5-carbaldehyde (150 mg, 0.99 mmol) afforded **6** in 200 mg (yield 75%). <sup>1</sup>H NMR (300 MHz; DMSO-d<sub>6</sub>): δ 12.18 (bs, 1H), 7.40 (s, 1H), 7.35-7.33 (d, *J* = 6 Hz, 1H), 7.10-7.05 (m, 1H), 6.89 (s, 1H), 6.64-6.63 (d, *J* = 3 Hz, 1H), 6.05 (s, 2H), 2.34 (s, 3H). <sup>13</sup>C NMR (125 MHz; DMSO-d<sub>6</sub>): δ 164.55, 158.19, 156.64, 155.50, 148.90, 148.33, 141.64, 127.38, 126.64, 112.13, 109.73, 109.39, 105.50, 102.18, 97.05, 20.02. LCMS (ESI) m/z:  $[M + H]^+$  calculated for (C<sub>16</sub>H<sub>12</sub>NO<sub>5</sub>) 298.06, found 298.18.

(Z)-6-methyl-1-((1-methyl-1H-imidazol-4-yl)methylene)furo[3,4-c]pyridine-3,4(1H,5H)-dione (**7**)

Following the general protocol 1-methyl-1H-imidazole-4-carbaldehyde (109 mg, 0.99 mmol) afforded **7** in 182 mg (yield 79%). <sup>1</sup>H NMR (500 MHz; DMSO-d<sub>6</sub>): δ 11.98 (br. s, 1H), 8.03 (m, 1H), 7.61-7.55 (m, 1H); 7.49 (s, 1H); 6.86 (s, 1H), 3.92 (s, 3H), 2.31 (s, 3H). <sup>13</sup>C NMR (125 MHz; DMSO-d<sub>6</sub>): δ 164.36, 158.08, 155.29, 153.91, 138.86, 136.50, 133.84, 127.01, 122.71, 120.83, 118.90, 110.64, 108.20, 105.93, 96.48. HRMS (ESI-TOF) m/z:  $[M + H]^+$  calculated for (C<sub>13</sub>H<sub>12</sub>N<sub>3</sub>O<sub>3</sub>) 258.08, found 258.19.

(Z)-1-(3, 4-difluorobenzylidene)-6-methylfuro[3,4-c]pyridine-3,4(1H,5H)-dione (**8**)

Following the general protocol 3,4-difluorobenzaldehyde (140 mg, 0.99 mmol) afforded **8** in 220 mg (yield 85%). <sup>1</sup>H NMR (300 MHz; DMSO-d<sub>6</sub>): δ 12.25 (bs, 1H), 7.85-7.79 (m, 1H), 7.62-7.55 (m, 2H), 6.99 (s, 1H), 6.62 (s, 1H), 2.34 (s, 3H). <sup>13</sup>C NMR (125 MHz; DMSO-d<sub>6</sub>): δ 164.21, 158.00, 156.47, 156.26, 143.69, 130.88, 128.11, 118.99, 118.85, 118.76, 118.62, 109.32, 106.00, 97.23, 20.07. LCMS (ESI) m/z: [M + H]<sup>+</sup> calculated for (C<sub>15</sub>H<sub>10</sub>F<sub>2</sub>NO<sub>3</sub>) 290.05, found 290.17.

**(Z)-1-(3-bromobenzylidene)-6-methylfuro[3,4-c]pyridine-3,4(1H,5H)-dione (9)**

Following the general protocol 3-bromobenzaldehyde (182 mg, 0.99 mmol) afforded **9** in 178 mg (yield 60%). <sup>1</sup>H NMR (300 MHz; DMSO-d<sub>6</sub>): δ 12.41-12.21 (bs, 1H), 8.00 (s, 1H), 7.80-7.75 (d, *J* = 15 Hz, 1H), 7.61-7.56 (m, 1H), 7.48-7.40 (m, 1H), 6.99 (s, 1H), 6.68 (s, 1H), 2.31 (s, 3H). <sup>13</sup>C NMR (125 MHz; DMSO-d<sub>6</sub>): δ 168.30, 158.04, 156.54, 156.27, 144.10, 135.53, 132.74, 132.23, 131.52, 129.71, 122.61, 109.86, 106.10, 97.35, 56.50, 20.10, 19.01. LCMS (ESI) m/z: [M + H]<sup>+</sup> calculated for (C<sub>15</sub>H<sub>11</sub>BrNO<sub>3</sub>) 332.1488, found 332.0950.

**(Z)-1-(4-bromobenzylidene)-6-methylfuro[3,4-c]pyridine-3,4(1H,5H)-dione (10)**

Following the general protocol 4-bromobenzaldehyde (182 mg, 0.99 mmol) afforded **10** in 192 mg (yield 64%). <sup>1</sup>H NMR (300 MHz; DMSO-d<sub>6</sub>): δ 12.35-12.25 (bs, 1H), 7.79-7.81 (m, 4H), 6.98 (s, 1H), 6.67 (s, 1H), 2.36 (s, 3H). <sup>13</sup>C NMR (125 MHz; DMSO-d<sub>6</sub>): δ 164.37, 158.10, 156.61, 156.11, 143.67, 132.58, 132.49, 132.44, 123.18, 110.45, 106.02, 97.34, 20.09. LCMS (ESI) m/z: [M + H]<sup>+</sup> calculated for (C<sub>15</sub>H<sub>11</sub>BrNO<sub>3</sub>) 332.1488, found 332.1330.

**(Z)-6-methyl-1-(naphthalen-2-ylmethylene)furo[3,4-c]pyridine-3,4(1H,5H)-dione (11)**

Following the general protocol 3-naphthaldehyde (152 mg, 0.99 mmol) afforded **11** in 231 mg (yield 84%). <sup>1</sup>H NMR (300 MHz; DMSO-d<sub>6</sub>): δ 12.23 (bs, 1H), 8.59-8.42 (m, 1H), 8.25-8.19 (m, 1H), 8.01-7.95 (m, 2H), 7.65-7.52 (m, 4H), 7.19 (s, 1H), 2.36 (s, 3H). <sup>13</sup>C NMR (125 MHz; DMSO-d<sub>6</sub>): δ 164.75, 158.31, 156.75, 155.92, 144.54, 133.84, 131.77, 130.29, 130.24, 129.77, 129.11, 127.42, 126.87, 126.17, 124.32, 107.50, 105.94, 97.93, 20.17. LCMS (ESI) m/z: [M + H]<sup>+</sup> calculated for (C<sub>19</sub>H<sub>14</sub>NO<sub>3</sub>) 304.09, found 304.23.

**(Z)-1-(2,3-dimethoxybenzylidene)-6-methylfuro[3,4-c]pyridine-3,4(1H,5H)-dione (12)**

Following the general protocol 2,3-dimethoxybenzaldehyde (164 mg, 0.99 mmol) afforded **12** in 220 mg (yield 78%). <sup>1</sup>H NMR (300 MHz; DMSO-d<sub>6</sub>): δ 12.20 (bs, 1H), 7.40 (s, 1H), 7.64-7.62 (m, 1H), 7.21-7.15 (m, 2H), 6.95 (s, 1H), 6.88 (s, 1H) 3.80 (s, 6H), 2.31 (s, 1H). LCMS (ESI) m/z: [M + H]<sup>+</sup> calculated for (C<sub>15</sub>H<sub>12</sub>NO<sub>5</sub>) 314.09, found 314.21.

**(Z)-1-benzylidene-6-methylfuro[3,4-c]pyridine-3,4(1H,5H)-dione (13)**

Following the general protocol benzaldehyde (105 mg, 0.99 mmol) afforded **13** in 163 mg (yield 74%). <sup>1</sup>H NMR (500 MHz; DMSO-d<sub>6</sub>): δ 12.00 (br. s, 1H), 7.82-7.78 (m, 2H), 7.59-7.39 (m, 3H), 6.99 (s, 1H); 6.79 (s, 1H), 2.31 (s, 3H). <sup>13</sup>C NMR (125 MHz; DMSO-d<sub>6</sub>): δ 164.59, 158.17, 156.78, 155.94, 143.19, 133.21, 130.86, 129.83, 129.49, 111.82, 105.95, 97.34, 20.20. HRMS (ESI-TOF) m/z: [M + H]<sup>+</sup> calculated for (C<sub>15</sub>H<sub>12</sub>NO<sub>3</sub>) 254.07, found 254.14.

**(Z)-1-(3-chlorobenzylidene)-6-methylfuro[3,4-c]pyridine-3,4(1H,5H)-dione (14)**

Following the general protocol 3-chlorobenzaldehyde (140 mg, 0.99 mmol) afforded **14** in 229 mg (yield 80%). <sup>1</sup>H NMR (400 MHz; DMSO-d<sub>6</sub>): δ 12.25 (br. s, 1H), 7.84-7.82 (m, 2H), 7.78-7.71 (m, 1H), 7.58-7.42 (m, 2H), 6.99 (s, 1H), 6.74 (s, 1H) 2.36 (s, 3H). <sup>13</sup>C NMR (100 MHz; DMSO-d<sub>6</sub>): δ 163.84, 157.58, 156.08, 155.81, 143.68, 134.80, 133.57, 130.81, 129.37, 128.91, 109.46, 105.66, 96.89, 19.64. UPLC m/z: [M + H]<sup>+</sup> calculated for (C<sub>16</sub>H<sub>10</sub>ClNO<sub>3</sub>) 288.03, found 288.01.

**(Z)-1-(3-iodobenzylidene)-6-methylfuro[3,4-c]pyridine-3,4(1H,5H)-dione (15)**

Following the general protocol 3-iodobenzaldehyde (231 mg, 0.99 mmol) afforded **19** in 347 mg (yield 92%). <sup>1</sup>H NMR (400 MHz; DMSO-d<sub>6</sub>): δ 12.21 (br. s, 1H), 8.19-8.18 (d, *J* = 4 Hz, 1H), 7.81-7.75 (m, 2H), 7.35-7.25 (m, 1H), 6.96 (s, 1H), 6.71 (s, 1H) 2.37 (s, 3H). <sup>13</sup>C NMR (100 MHz; DMSO-d<sub>6</sub>): δ 164.39, 158.09, 156.62, 156.24, 143.95, 138.77, 138.11, 135.52, 131.52, 130.06, 109.97, 106.12, 97.38, 95.88, 20.16. UPLC m/z: [M + H]<sup>+</sup> calculated for (C<sub>15</sub>H<sub>11</sub>INO<sub>3</sub>) 379.97, found 380.00.

**(Z)-6-methyl-1-propylidenefuro[3,4-c]pyridine-3,4(1H,5H)-dione (16)**

Following the general protocol propionaldehyde (60 mg, 0.99 mmol) afforded **16** in 347185 mg (yield 90%). <sup>1</sup>H NMR (400 MHz; DMSO-d<sub>6</sub>): δ 11.99 (br. s, 1H), 6.61 (s, 1H), 6.08-6.00 (m,

1H), 2.39-2.35 (m, 2H), 2.11 (s, 3H), 1.18-1.08 (m, 3H). UPLC m/z: [M + H]<sup>+</sup> calculated for (C<sub>11</sub>H<sub>12</sub>NO<sub>3</sub>) 206.07, found 206.

**(Z)-1-(4-chlorobenzylidene)-6-methylfuro[3,4-c]pyridine-3,4(1H,5H)-dione (17)**

Following the general protocol 4-chlorobenzaldehyde (138 mg, 0.99 mmol) afforded **17** in 215 mg (yield 75%). <sup>1</sup>H NMR (400 MHz; DMSO-d<sub>6</sub>): δ 12.22 (br. s, 1H), 7.83-7.80 (d, *J* = 12 Hz, 2H), 7.60-7.57 (d, *J* = 12 Hz, 2H), 6.96 (s, 1H), 6.72 (s, 1H), 2.35 (s, 3H). <sup>13</sup>C NMR (125 MHz; DMSO-d<sub>6</sub>): δ 164.44, 158.15, 156.69, 156.17, 143.65, 134.36, 132.45, 132.18, 129.65, 110.43, 106.07, 97.39, 20.14. UPLC m/z: [M + H]<sup>+</sup> calculated for (C<sub>15</sub>H<sub>11</sub>ClNO<sub>3</sub>) 288.03, found 288.04

**(Z)-1-(4-iodobenzylidene)-6-methylfuro[3,4-c]pyridine-3,4(1H,5H)-dione (18)**

Following the general protocol 4-iodobenzaldehyde (228 mg, 0.99 mmol) afforded **18** in 265 mg (yield 70%). <sup>1</sup>H NMR (400 MHz; DMSO-d<sub>6</sub>): δ 12.18 (br. s, 1H), 7.85-7.81 (d, *J* = 16 Hz, 2H), 7.60-7.56 (d, *J* = 12 Hz, 2H), 6.91 (s, 1H), 6.74 (s, 1H), 2.31 (s, 3H). <sup>13</sup>C NMR (100 MHz; DMSO-d<sub>6</sub>): δ 163.94, 157.66, 155.65, 143.30, 137.92, 132.23, 132.06, 110.29, 105.57, 96.9, 19.65. UPLC m/z: [M + H]<sup>+</sup> calculated for (C<sub>15</sub>H<sub>11</sub>INO<sub>3</sub>) 379.97, found 380.01

**(Z)-1-(4-methoxybenzylidene)-6-methylfuro[3,4-c]pyridine-3,4(1H,5H)-dione (19)**

Following the general protocol 4-methoxybenzaldehyde (135 mg, 0.99 mmol) afforded **19** in 237 mg (yield 84%). <sup>1</sup>H NMR (400 MHz; DMSO-d<sub>6</sub>): δ 12.15 (br. s, 1H), 7.82-7.76 (d, *J* = 18 Hz, 2H), 7.18-7.12 (d, *J* = 17.8 Hz, 2H), 6.95 (s, 1H), 6.75 (s, 1H), 3.81 (s, 3H), 2.34 (s, 3H). <sup>13</sup>C NMR (125 MHz; DMSO-d<sub>6</sub>): δ 164.27, 160.24, 157.80, 156.26, 154.91, 140.98, 132.28, 125.38, 114.62, 111.69, 105.01, 96.61, 55.34, 19.57. UPLC m/z: [M + H]<sup>+</sup> calculated for (C<sub>16</sub>H<sub>13</sub>NO<sub>4</sub>) 284.08, found 284.11.

**(Z)-1-(2-bromobenzylidene)-6-methylfuro[3,4-c]pyridine-3,4(1H,5H)-dione (20)**

Following the general protocol 2-bromobenzaldehyde (180 mg, 0.99 mmol) afforded **20** in 310 mg (yield 94%). <sup>1</sup>H NMR (400 MHz; DMSO-d<sub>6</sub>): δ 12.31 (br. s, 1H), 8.15-8.12 (m, 1H), 7.80-7.74 (m, 1H), 7.58-7.55 (m, 1H), 7.39-7.32 (m, 1H), 6.95 (s, 1H), 6.94 (s, 1H), 2.32 (s, 3H). <sup>13</sup>C NMR (125 MHz; DMSO-d<sub>6</sub>): δ 167.04, 157.87, 156.23, 144.34, 133.47, 132.19, 130.87, 128.24,



124.58, 108.86, 105.88, 97.30, 20.03. UPLC m/z:  $[M + H]^+$  calculated for  $(C_{15}H_{11}BrNO_3)$  331.98, found 332.01.

**(Z)-1-(2-chlorobenzylidene)-6-methylfuro[3,4-c]pyridine-3,4(1H,5H)-dione (21)**

Following the general protocol 2-chlorobenzaldehyde (137 mg, 0.99 mmol) afforded **21** in 210 mg (yield 73%).  $^1H$  NMR (400 MHz; DMSO- $d_6$ ):  $\delta$  12.31 (br. s, 1H), 8.15-8.12 (m, 1H), 7.60-7.40 (m, 3H), 6.96 (s, 1H), 6.91 (s, 1H), 2.31 (s, 3H).  $^{13}C$  NMR (125 MHz; DMSO- $d_6$ ):  $\delta$  164.30, 158.05, 156.64, 156.37, 144.98, 133.80, 132.09, 131.18, 130.78, 130.32, 128.19, 106.32, 106.09, 97.64, 20.00. UPLC m/z:  $[M + H]^+$  calculated for  $(C_{15}H_{11}ClNO_3)$  288.03, found 288.04.

## Docking Studies with HumanTOP1

### Results & Discussion

According to the docking results, the binding energy (kcal/mol) of the best pose of compounds with receptor HumanTOP1 are:

| Compound Name | HumanTOP1 |
|---------------|-----------|
| Edotecarin    | -9.31     |
| <b>13</b>     | -7.70     |

All the compounds intercalates at the DNA cleavage site (Figure 2) and forms various bonded and non-bonded interactions as shown in Table and Figure 2 & 3.

| Compound Name                | Hydrogen Bonds Interactions               | Non-bonded Interactions                   |
|------------------------------|-------------------------------------------|-------------------------------------------|
| Camptothecin (PDB ID : 1T8I) | ARG364                                    | THR718, ASN722, DG12, DA113, DC112, TGP11 |
| Edotecarin                   | ARG364, ASN352, TGP11, DG12, DA113, DC112 | ALA351, TYR426, ASP533, ASN722, DT10      |
| <b>13</b>                    | ARG364, THR718, ASN722                    | DT10, DC112, DA113, TGP11                 |

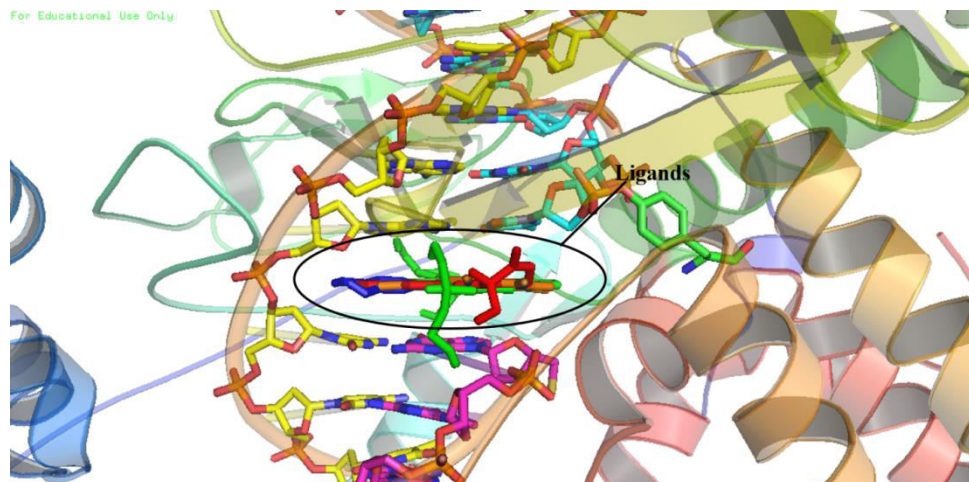

**Figure 1:** This figure shows the binding pose of docked compounds with HumanTOP1. Camptothecin in Red, Edotecarin in Green, **4** in Blue and **RM27** in Orange.

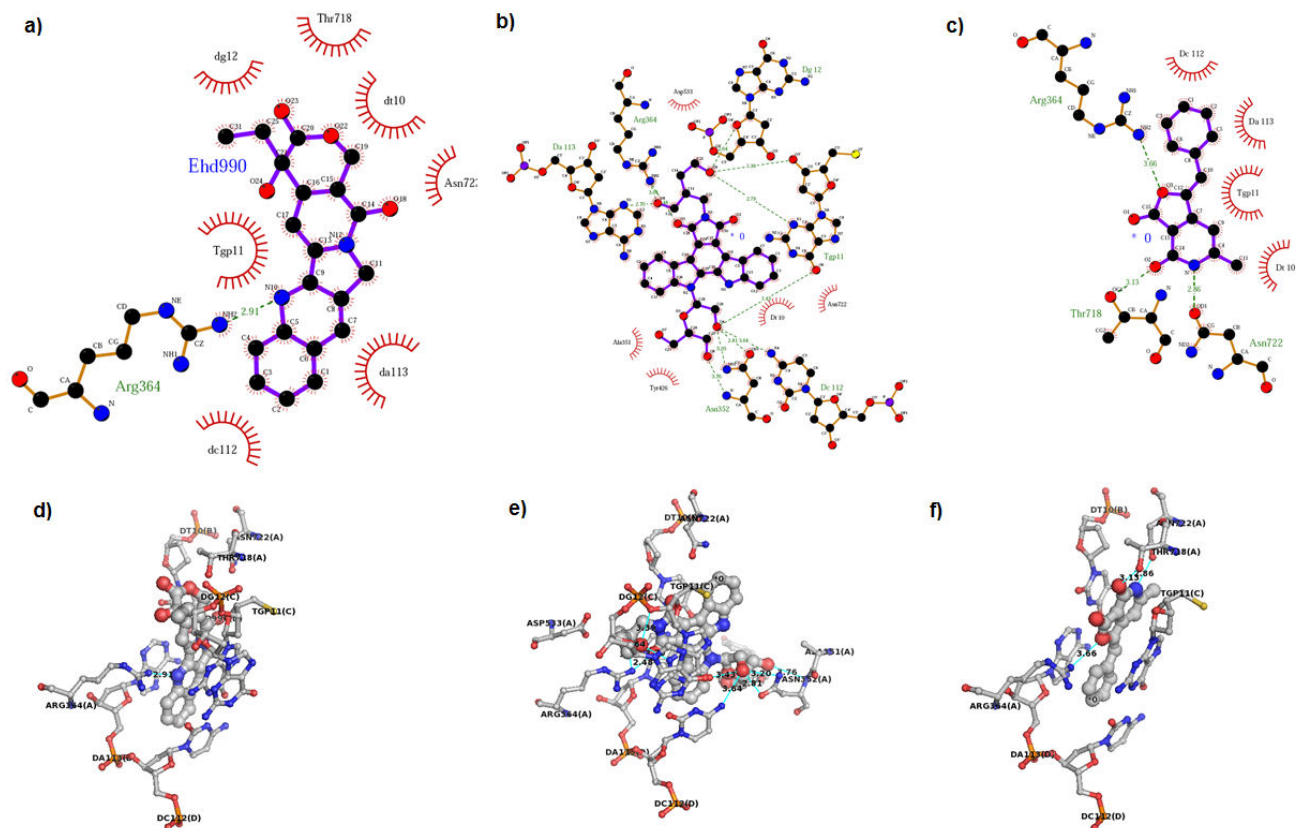

**Figure 2.** (a) Binding pose of Camptothecin in 2D; (b) Binding pose of Edotecarin in 2D; (c) Binding pose of **13** in 2D; (d) Binding pose of Camptothecin in 3D; (e) Binding pose of Edotecarin in 3D; (f) Binding pose of **13** in 3D.

## Docking Studies with Ld TOP1

### Results & Discussion

According to the docking results, the binding energy (kcal/mol) of the best pose of compounds with receptor LdTOP1 complex human Top1-DNA substituted are:

| Compound Name | LdTOP1 |
|---------------|--------|
| Camptothecin  | -10.01 |
| Edotecarin    | -11.15 |
| <b>4</b>      | -8.66  |
| <b>13</b>     | -8.07  |

All the compounds intercalate at the DNA cleavage site (Figure 3) and form various bonded and non-bonded interactions as shown in Table and Figure 4.

| Compound Name | Hydrogen Bonds Interactions          | Non-bonded Interactions                            |
|---------------|--------------------------------------|----------------------------------------------------|
| Camptothecin  | ARG190, THR217, HIS453, GLN454, DG12 | ASN221, ARG314, ASP353, ILE355, DT10, DA113, TGP11 |
| Edotecarin    | ARG190, GLN454, DT10, TGP11, DG12    | ASN178, ILE220, ASN221, ASP353, DC112, DA113       |

|    |                       |                            |
|----|-----------------------|----------------------------|
| 4  | ARG190, ASN221, DA113 | THR217, DT10, TGP11, DC112 |
| 13 | ARG190, GLN454, TGP11 | ASN221, DT10, DG12         |

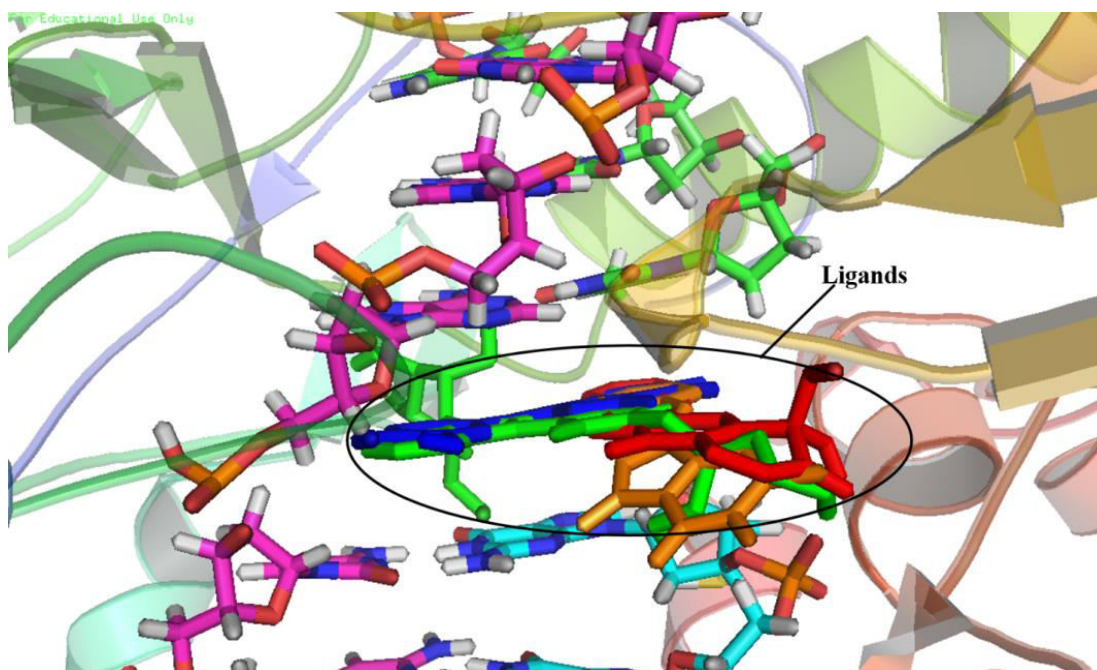

**Figure 3:** This figure shows the binding pose of docked compounds with LdTOP1. Camptothecin in Red, Edotecarin in Green, 4 in Blue and 13 in Orange.

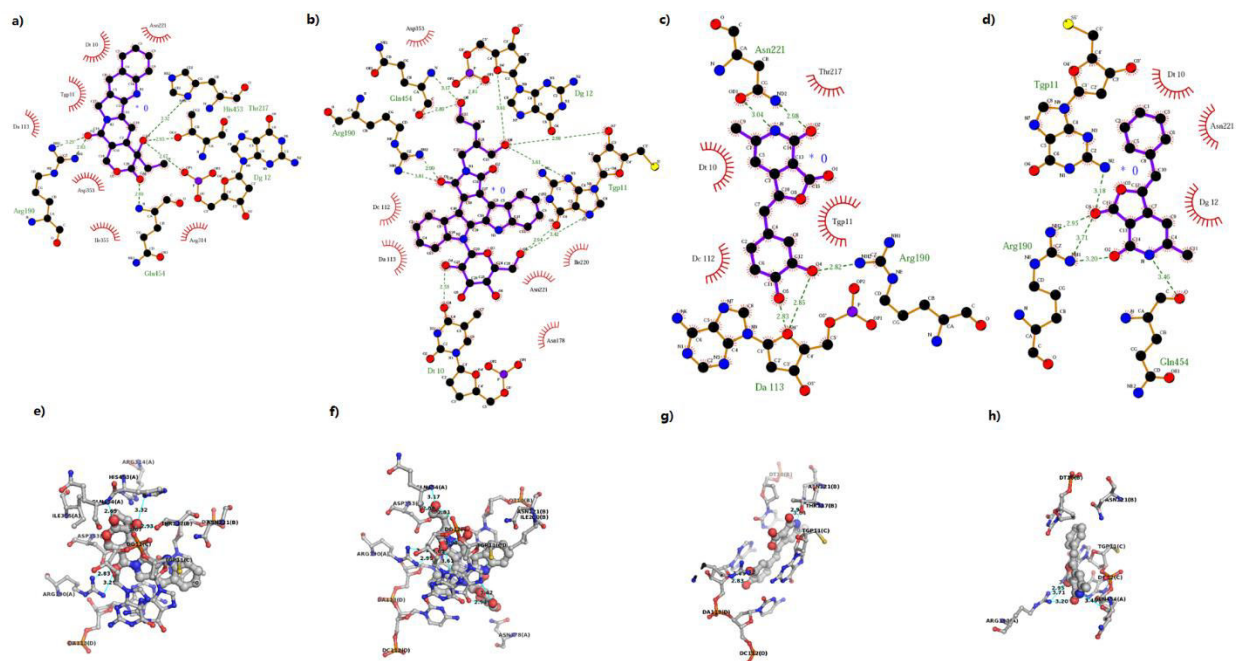

Figure 4. (a) Binding pose of Camptothecin in 2D; (b) Binding pose of Edotecarin in 2D; (c) Binding pose of **4** in 2D; (d) Binding pose of **13** in 2D; (e) Binding pose of Camptothecin in 3D; (f) Binding pose of Edotecarin in 3D; (g) Binding pose of **4** in 3D; (h) Binding pose of **13** in 3D.

Sample Name:  
A119-1

Solvent:  $CDCl_3$   
Date: May 21 2015  
Agilent Version: 3.00 / rev. 3  
Experiment No: 0215082160\_100000

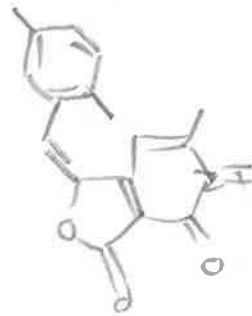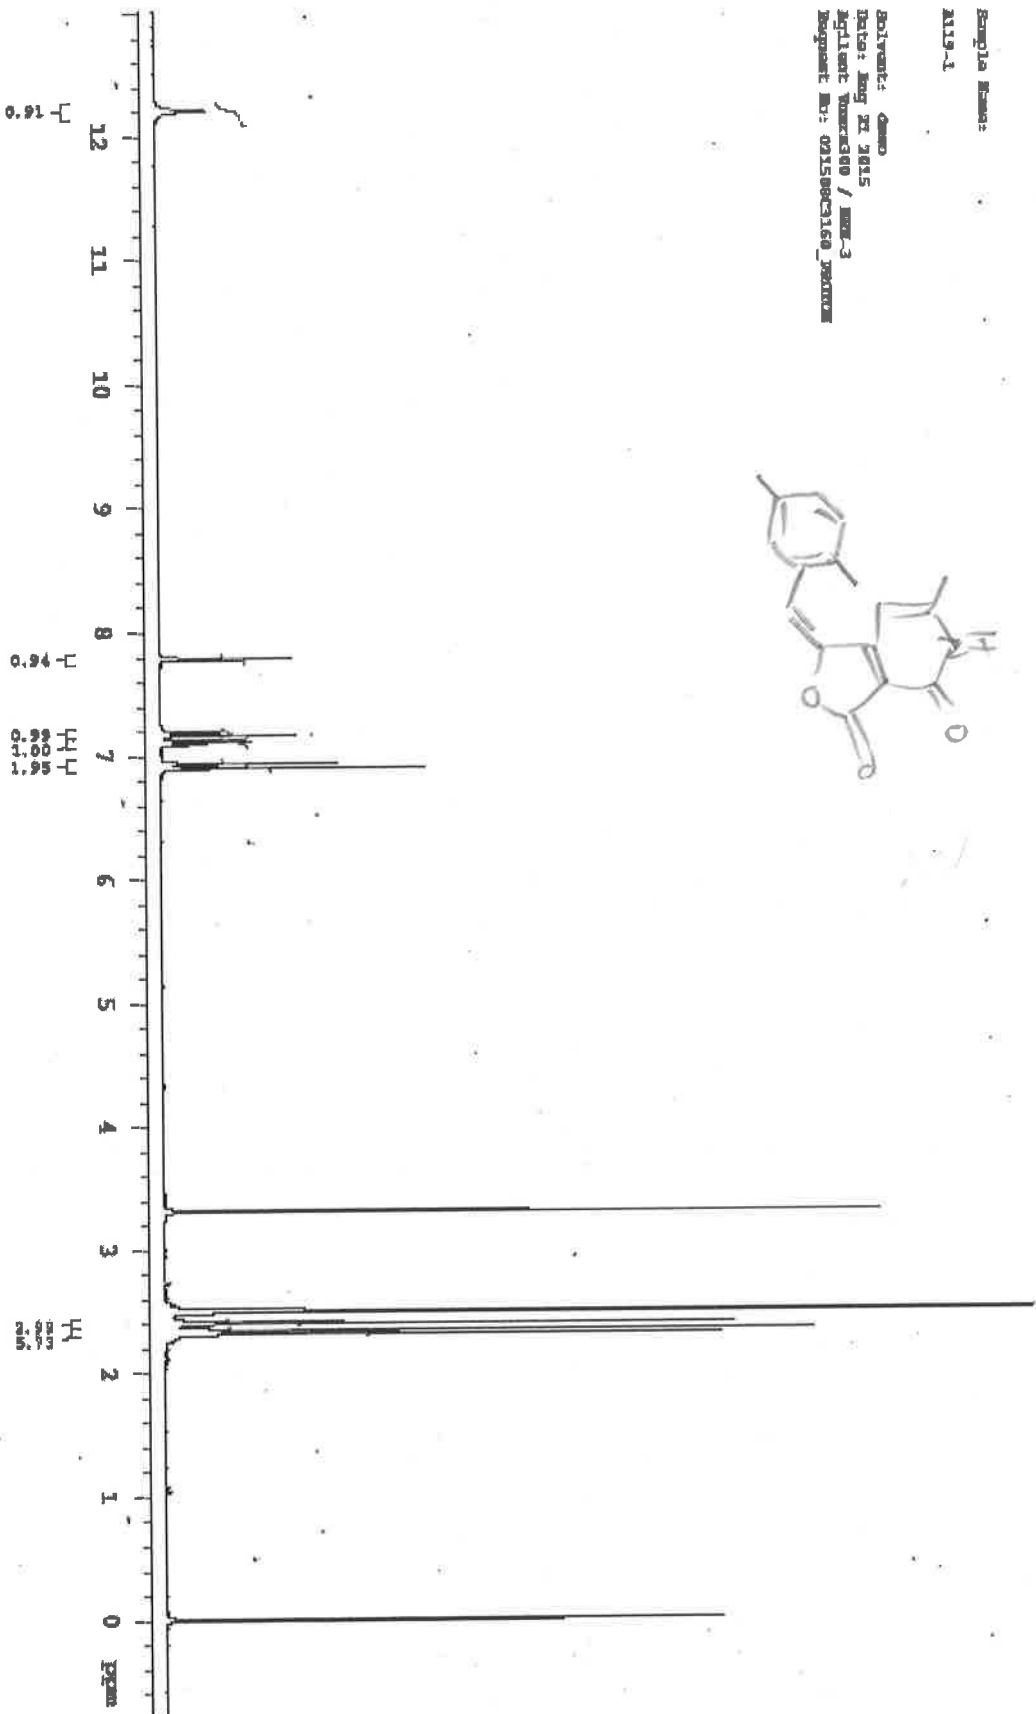

Filename: 0215082160\_100000\_01\_100000

Sample Name:  
A119-21

Reference: Chem  
Date: Aug 21 2015  
Applicant: Vanda-Gen / NEM-3  
Request No: 0215060313\_PROTON

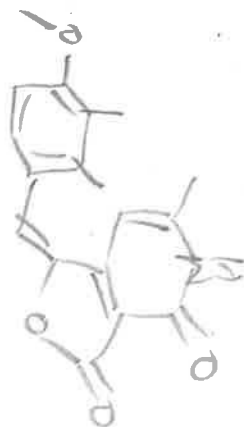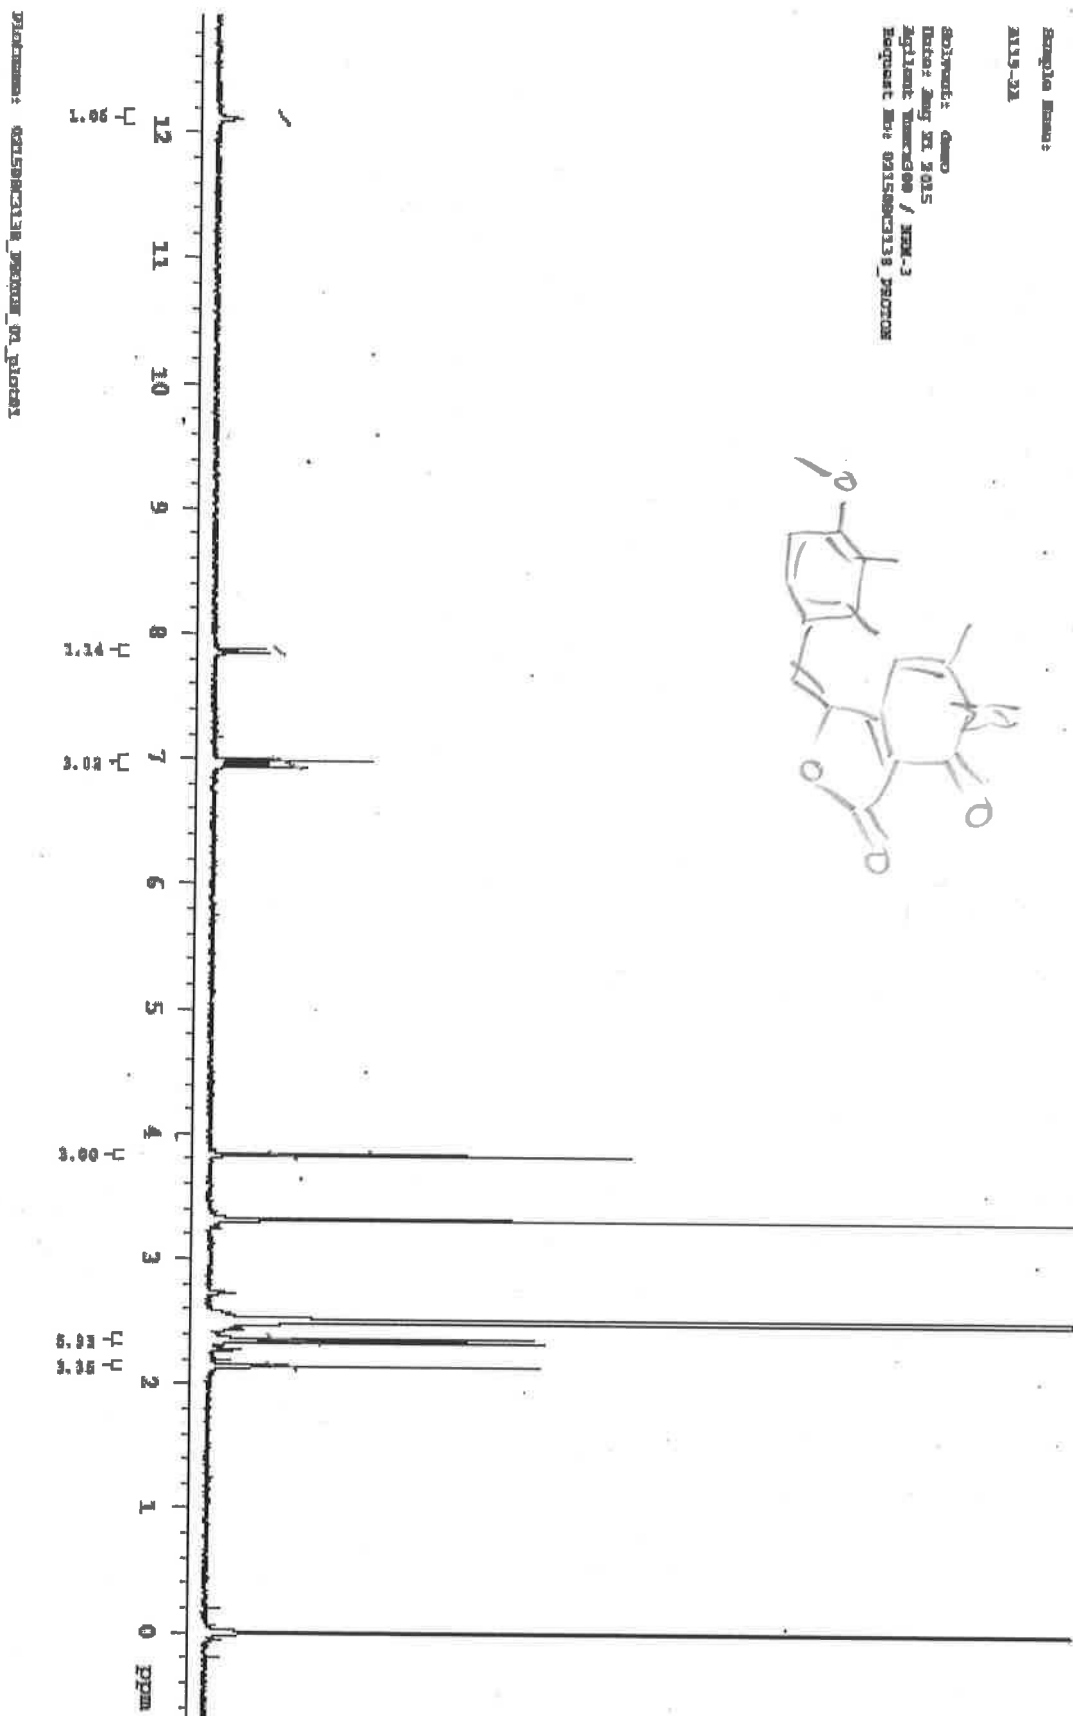

Sample Name:  
M19-5

Solvent: CDCl<sub>3</sub>  
Pulse: zgpg30  
AcqDate: 20110615 11:55:30  
AcqTime: 11:55:30  
Experiment: zgpg30

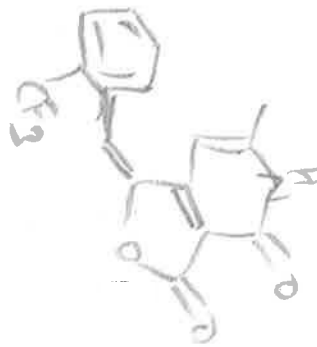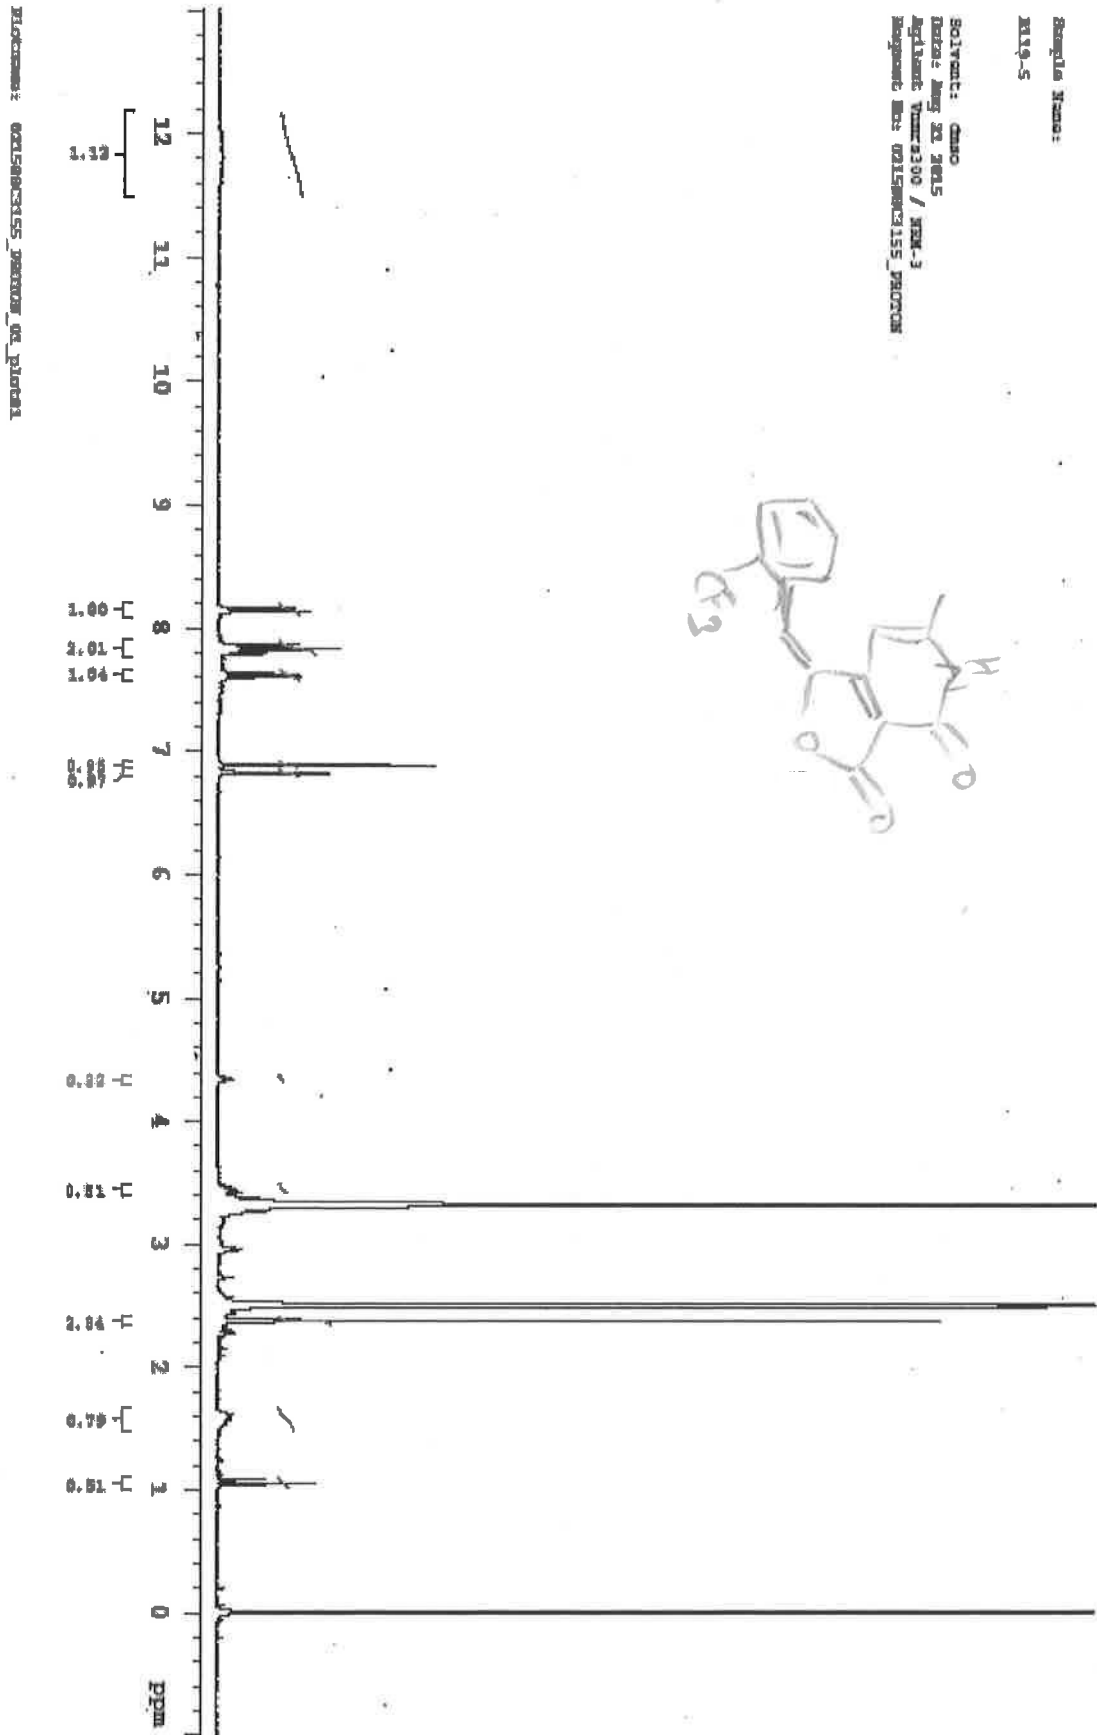

Microscopy: 02150615155\_P1000000\_001\_P1000000



Sample Name:  
1130-5

Solvent:  $CDCl_3$   
Date: May 21, 2015  
Applicant: VANDERBILT / NMR-3  
Request No: 0215083147\_P0000

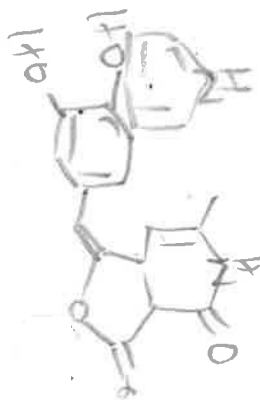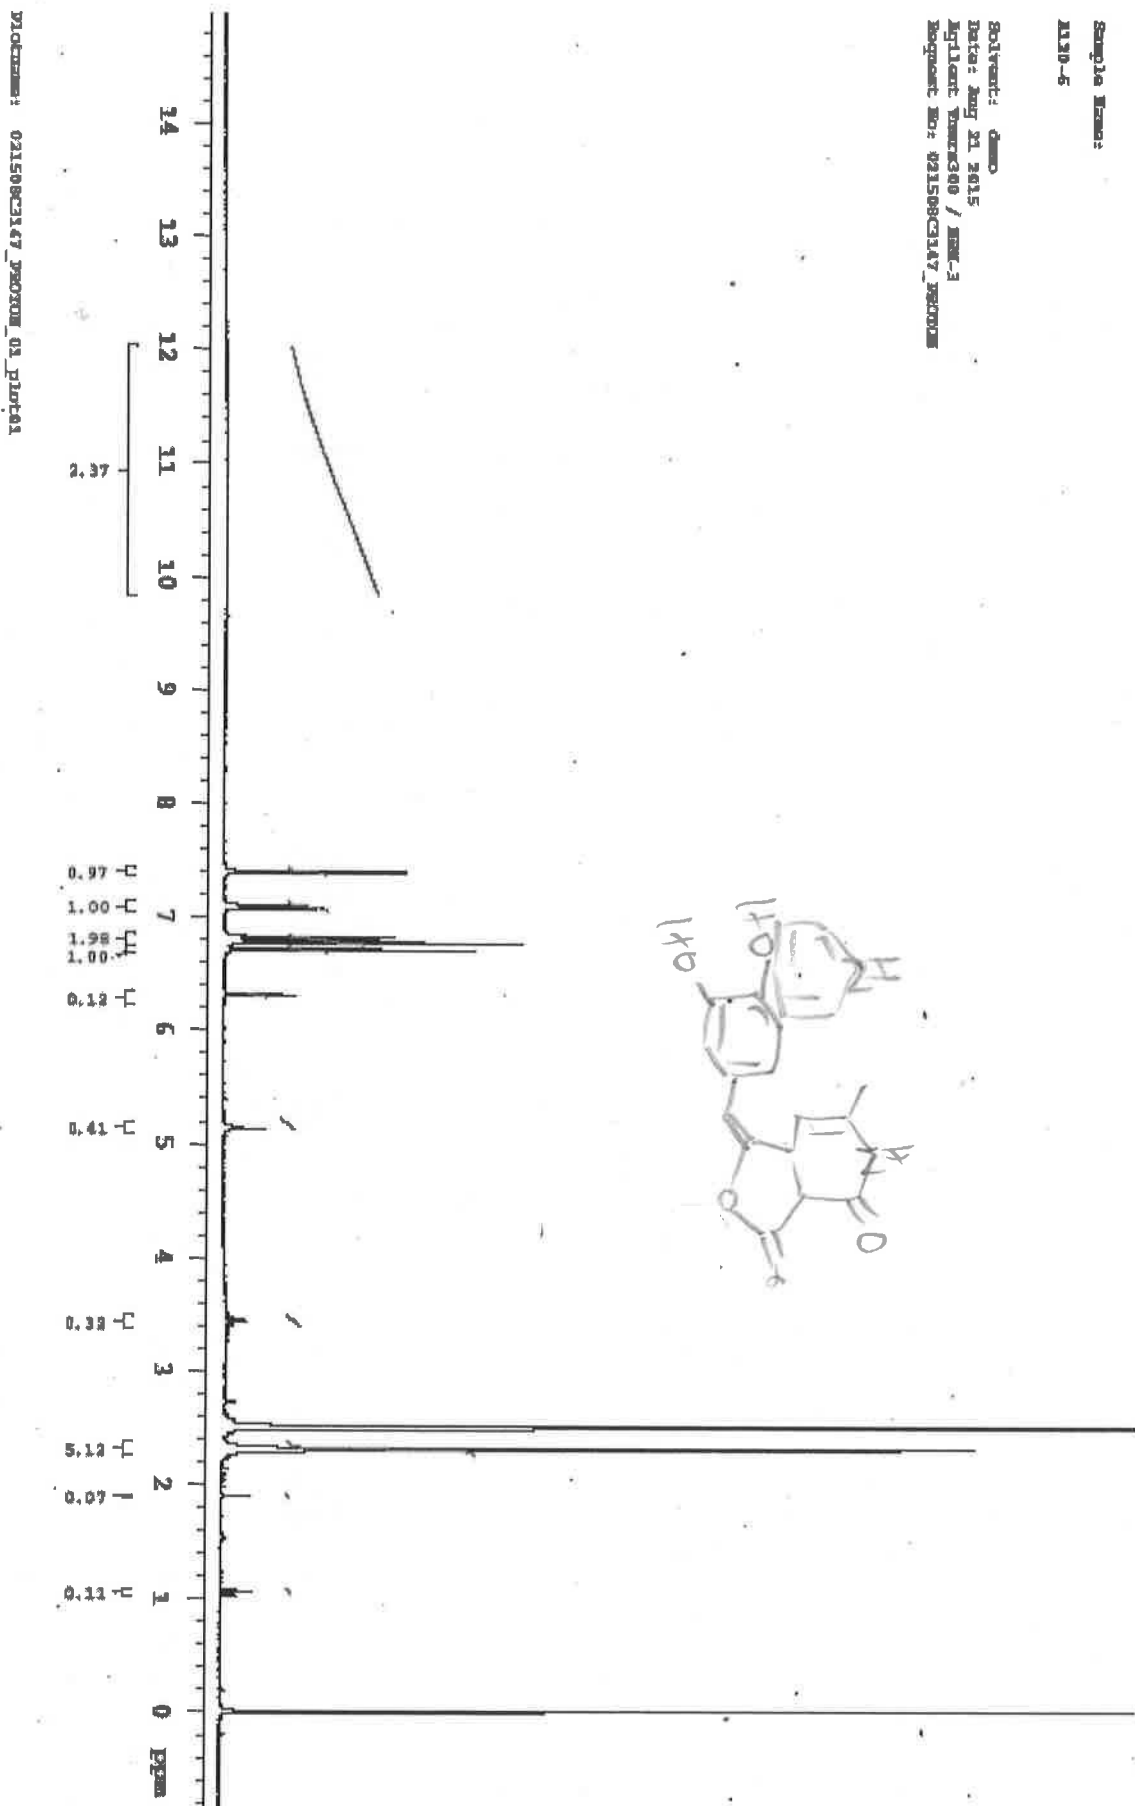

0215083147\_P0000\_01\_P10F01

Sample Name: 1130-7

Solvent: MeOH  
Date: Aug 21 2015  
Magnetic Resonance / NMR-3  
Experiment No: 0215082316\_120208

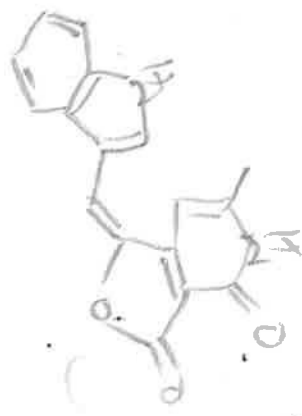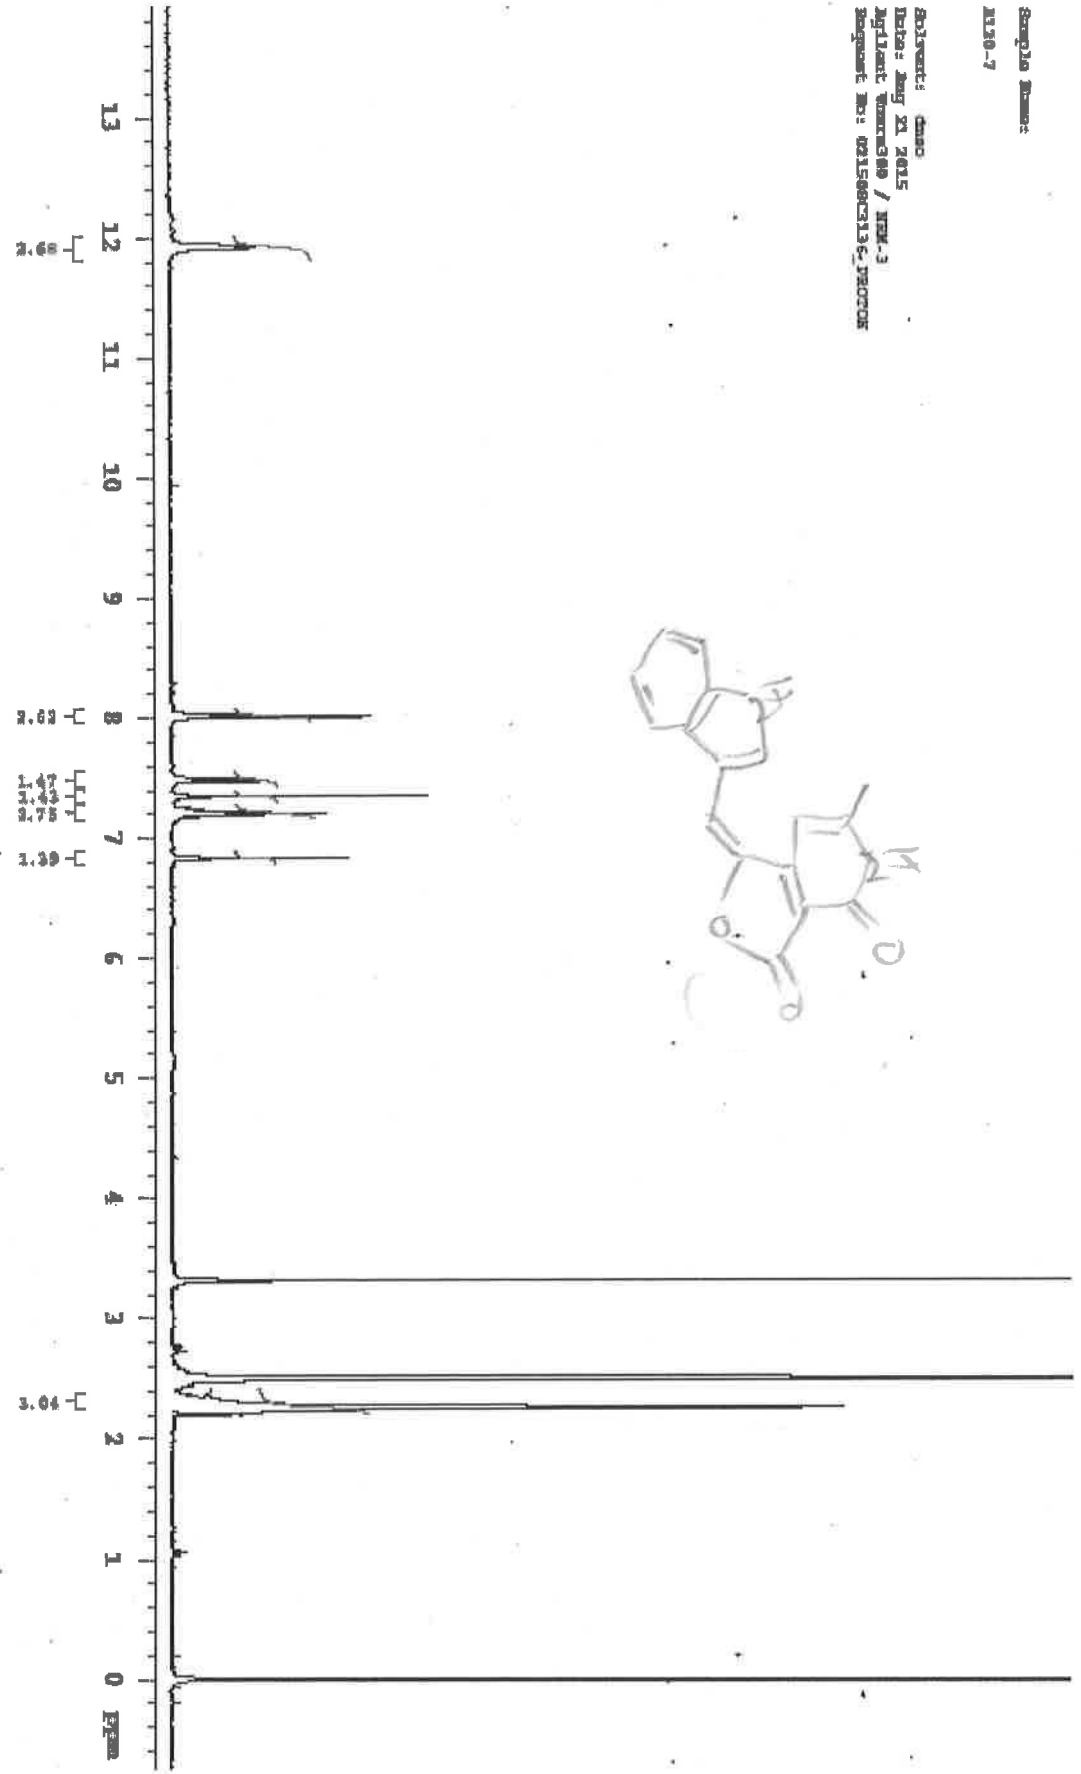

Filename: 0215082316\_120208\_01\_210221

Sample Name:

1170-15

Solvent:  $CDCl_3$   
Date: Aug 24 2015  
Milestone 089-M2 / 888-3  
Experiment No: 021508CA318 PROTON

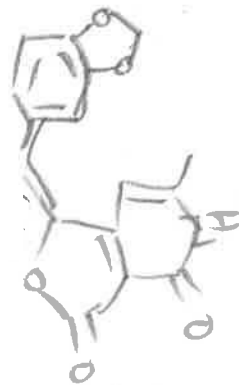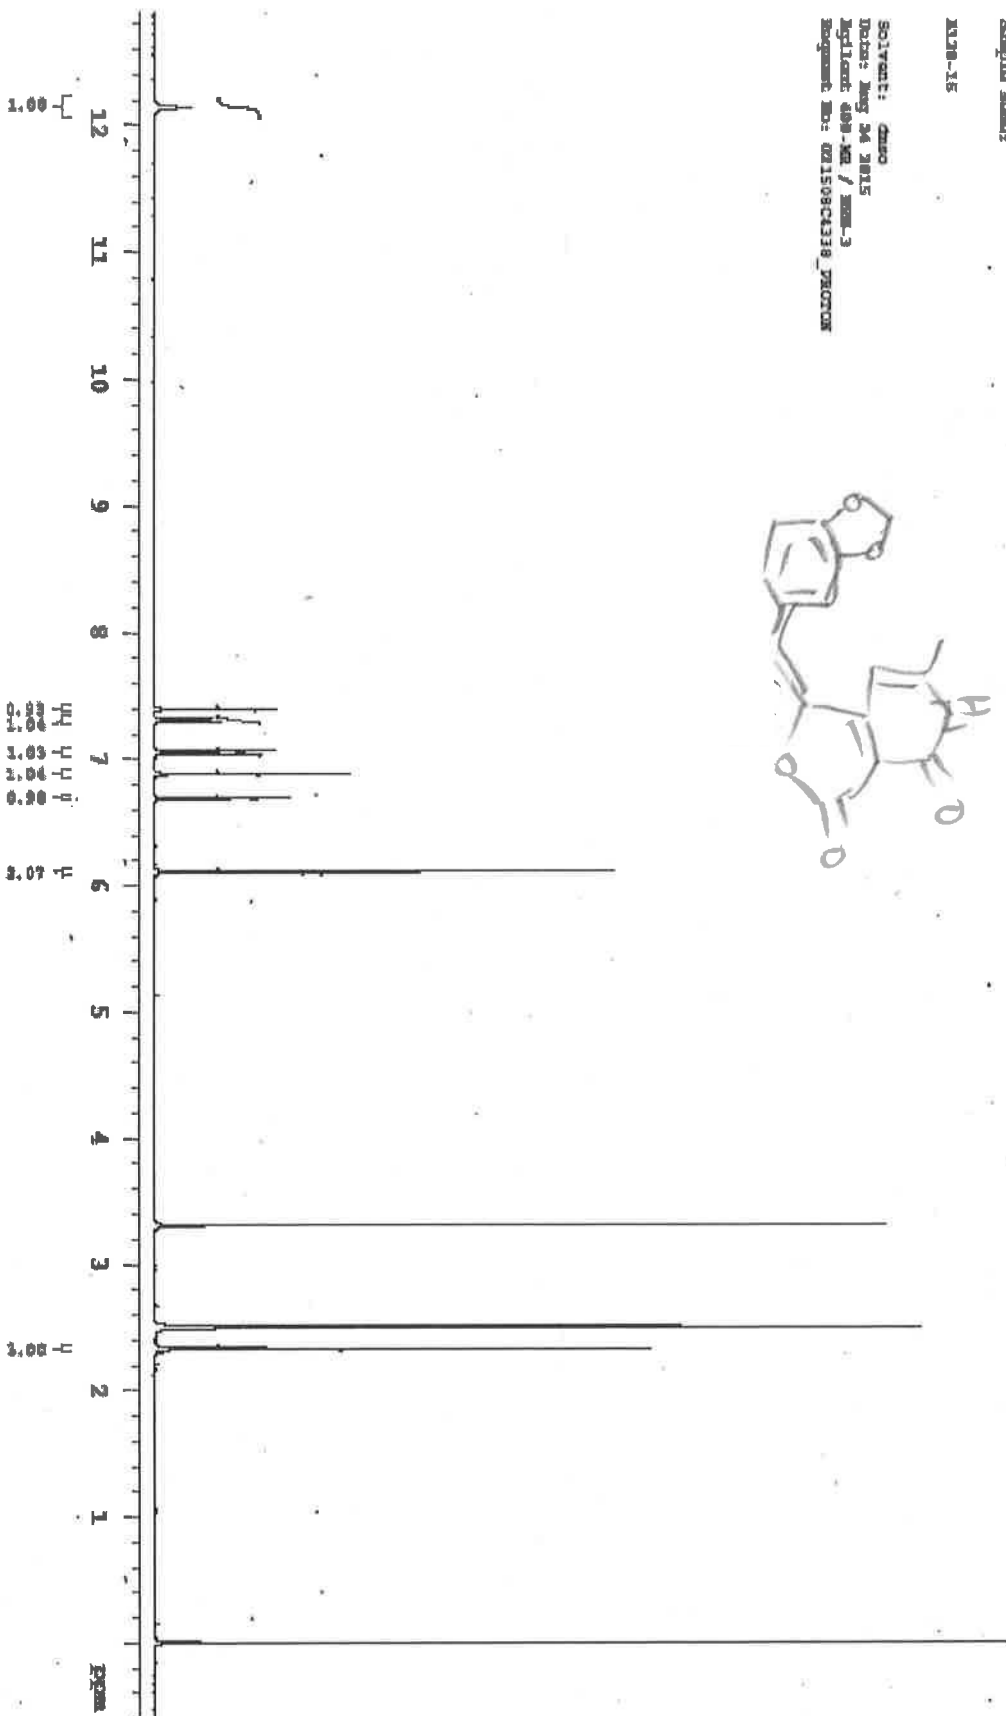

Filename: 021508CA318 PROTON1 PROTON

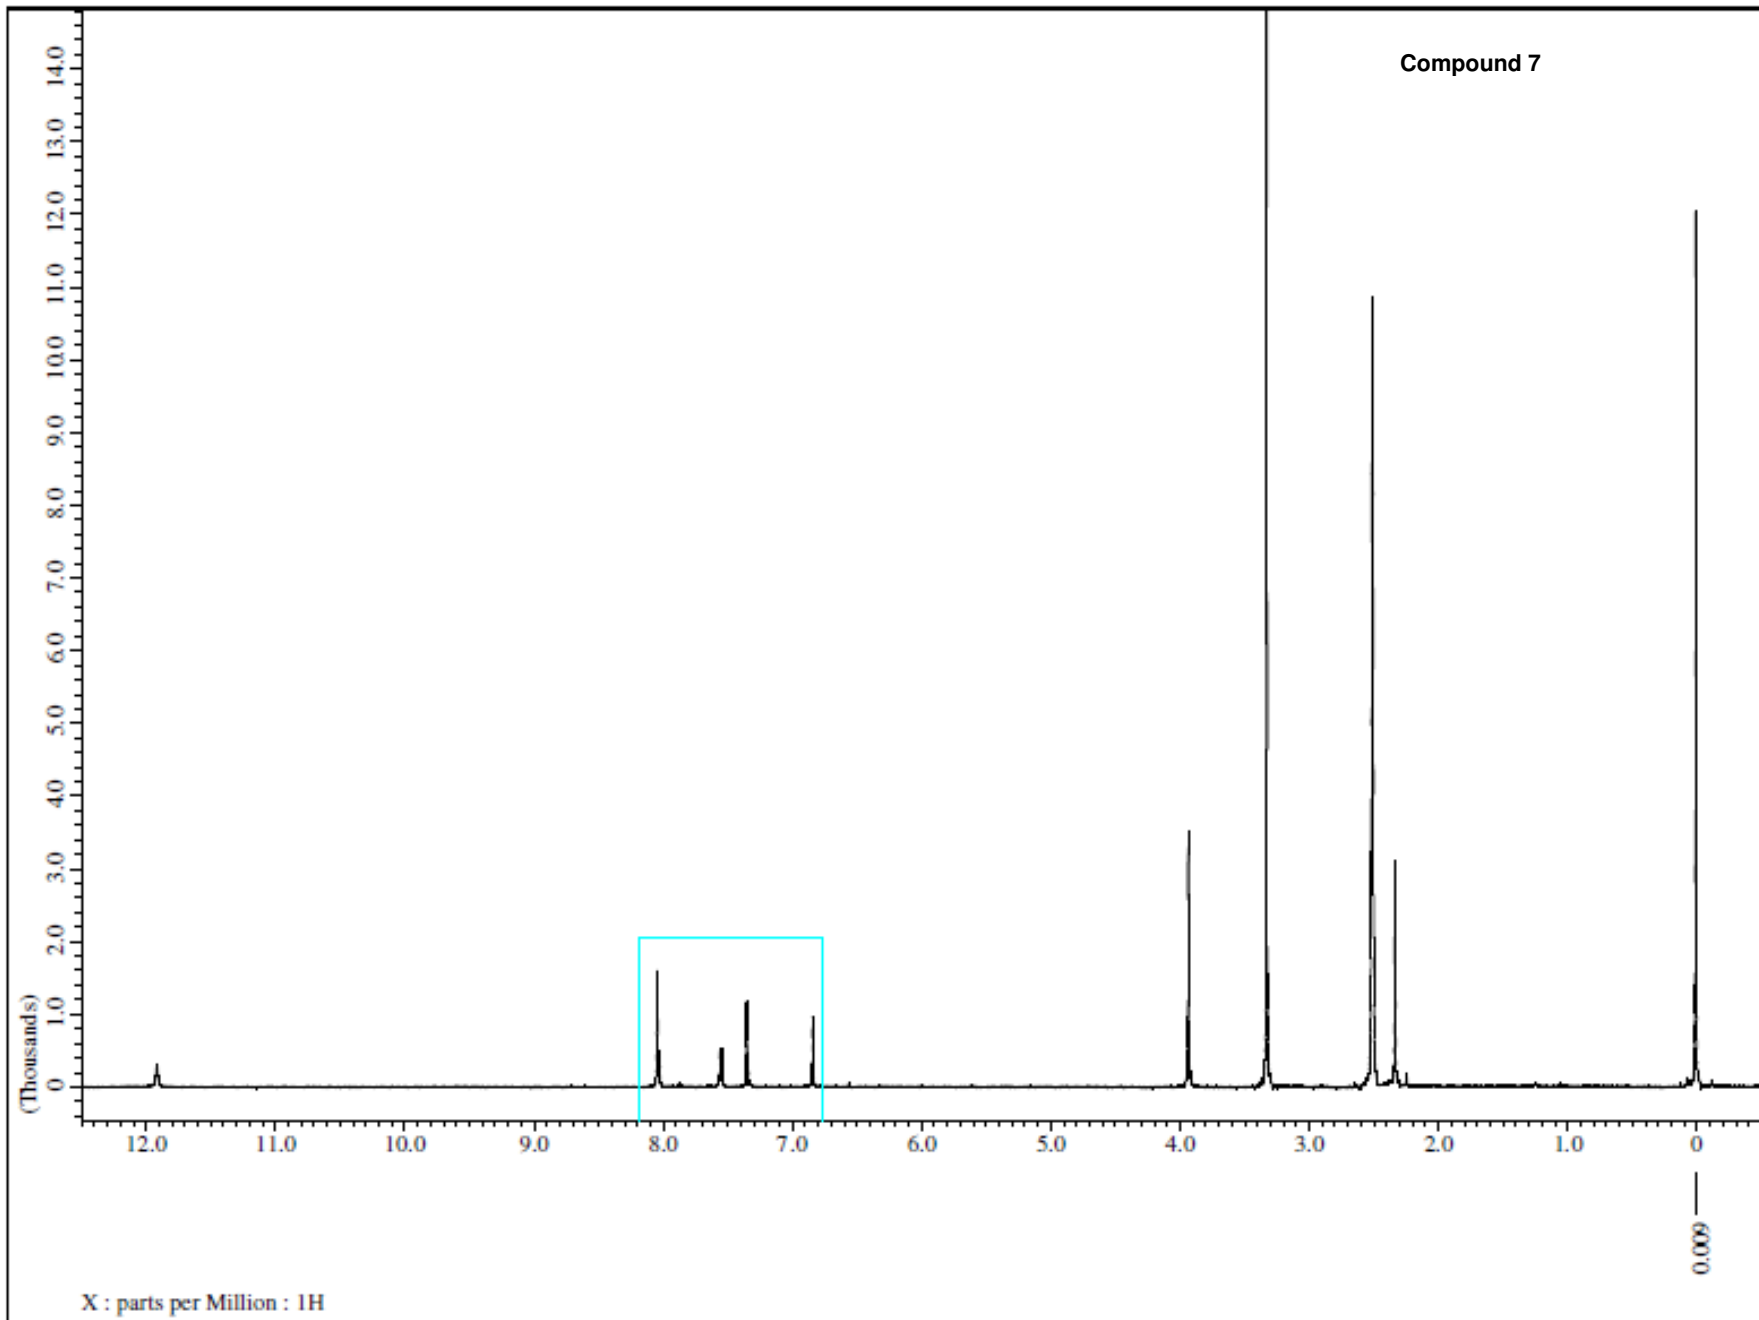

Sample Name: 2122-18

Solvent: CDCl<sub>3</sub>  
Date: Aug 21 2015  
Applicant: Varian/300 / HPL-3  
Experiment No: 0215082145\_P00007

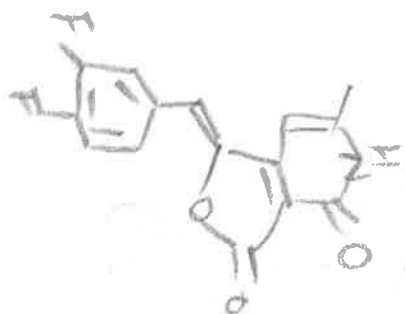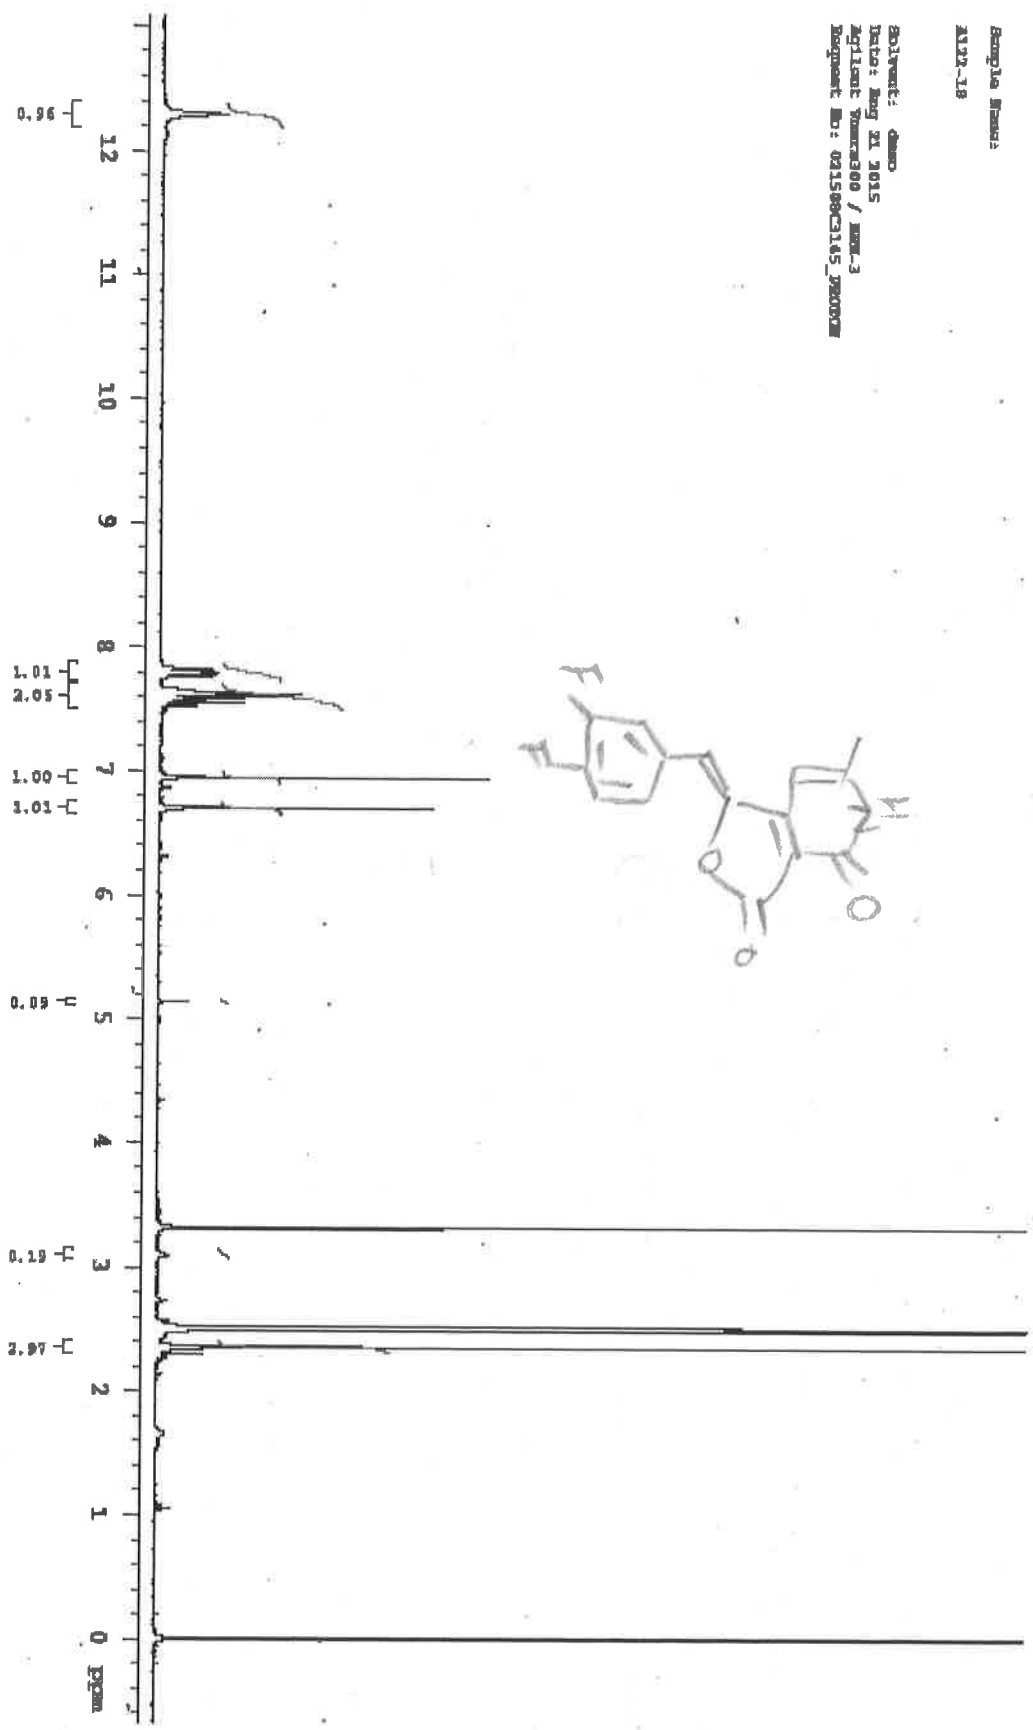

Filename: 0215082145\_P00007\_01.D16001

Sample Name:  
1177-10

Solvent: CDCl<sub>3</sub>  
Date: Aug 21 2015  
Agilent Varian300 / NMR-3  
Program: hpc 0215082140\_PROTON

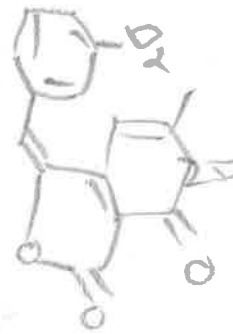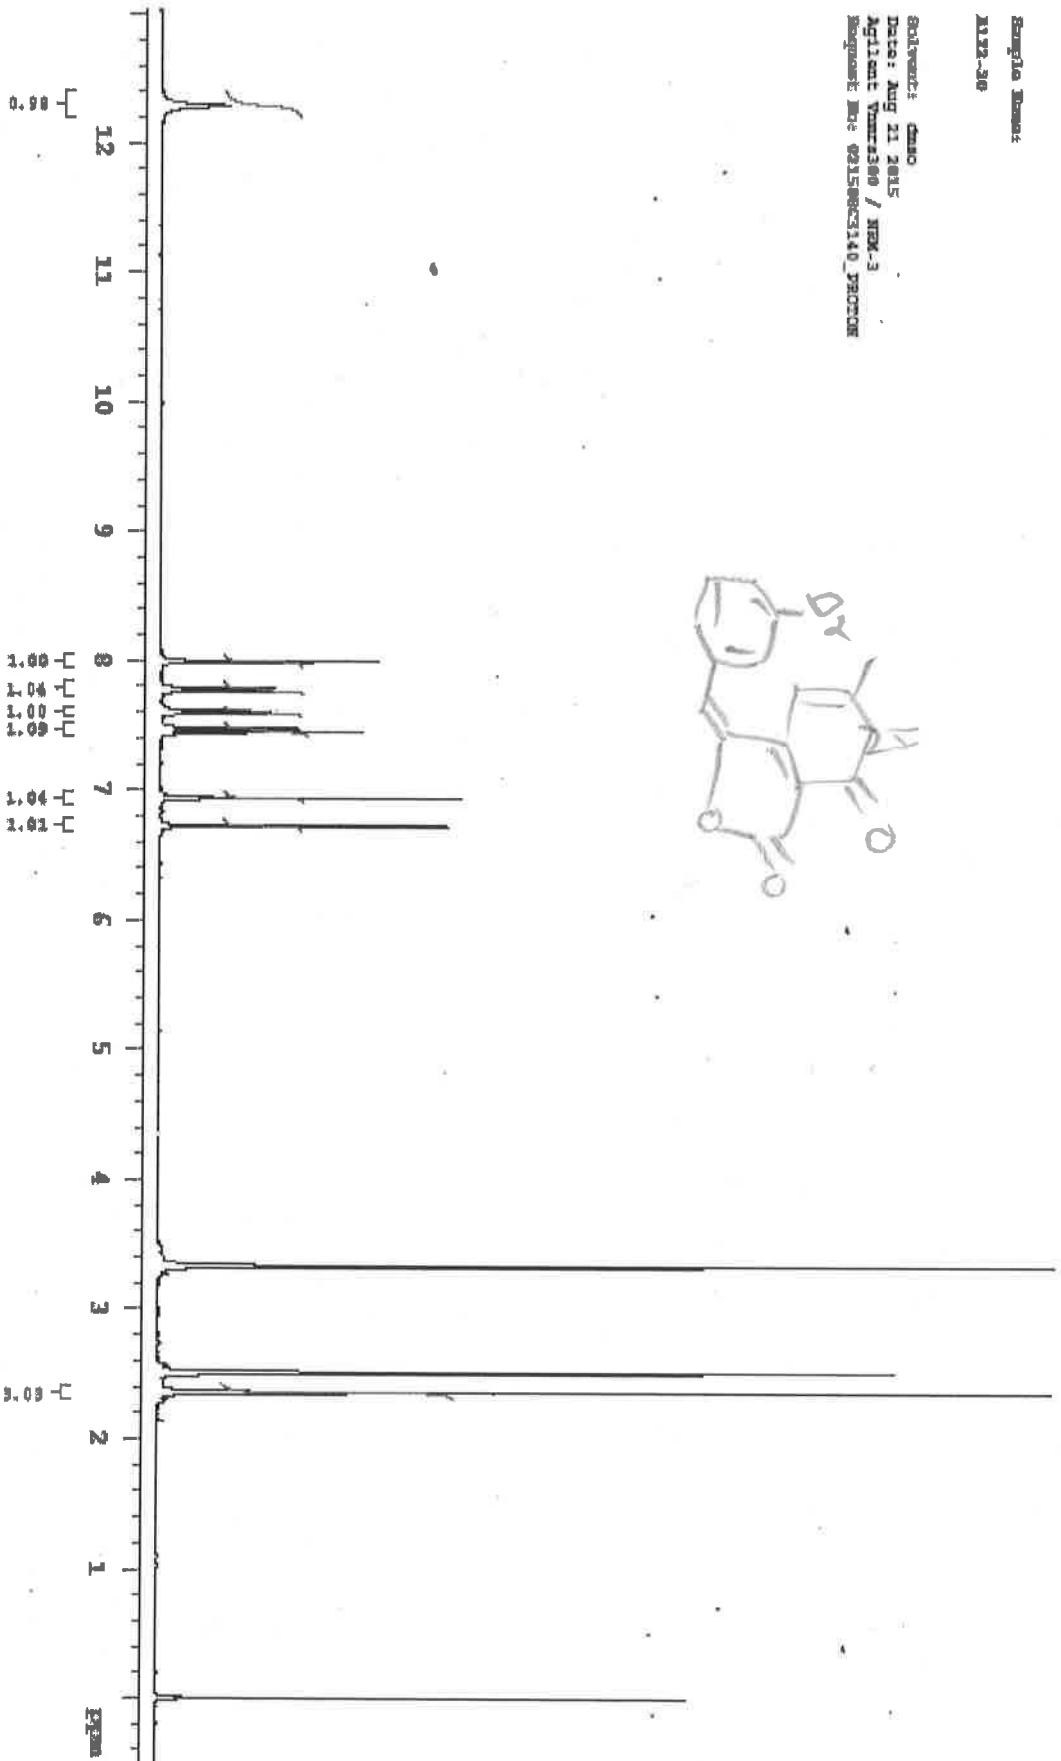

File Name: 0215082140\_PROTON\_01.DIC

Sample Name:  
A122-21

Solvent: dmsd  
Date: Aug 21 2015  
Milestone Version: 3.09 / Rev: 3  
Acquisition No: 02150823121\_PROTON

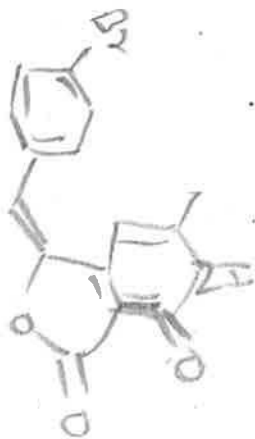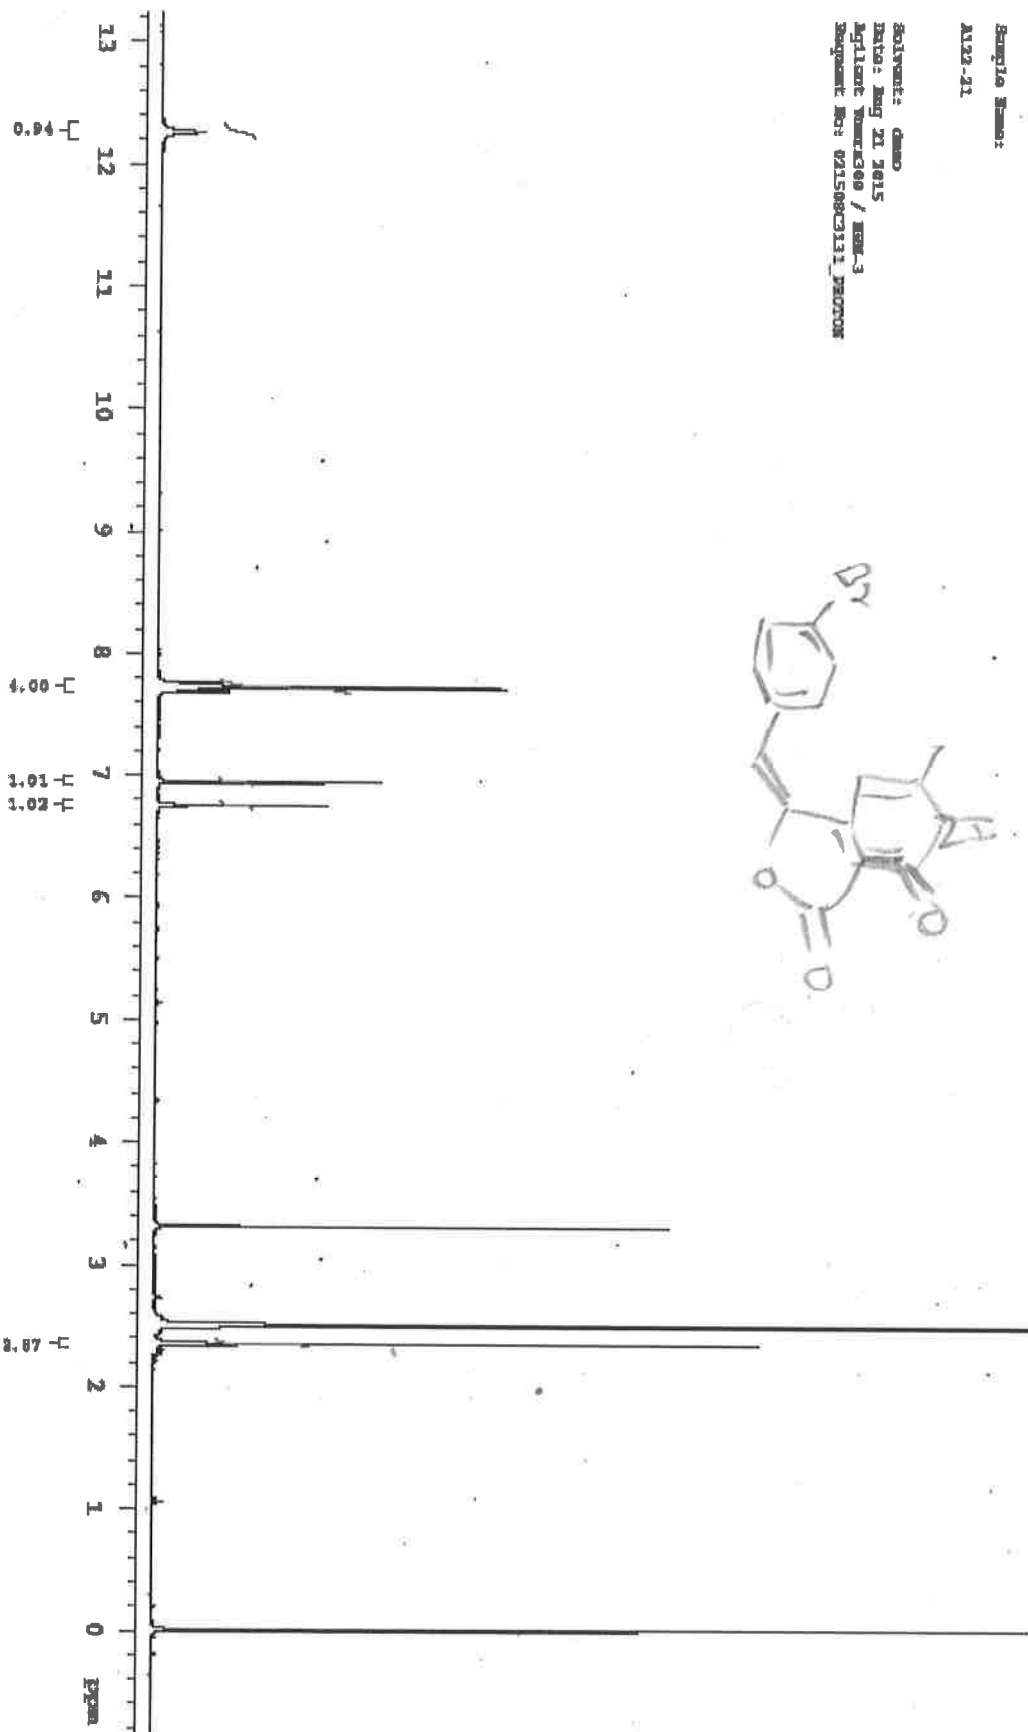

Filename: 02150823121\_PROTON\_04\_212015

Sample Name:  
M119-32

Solvent: CHCl3  
Date: Aug 24 2015  
Agilent VNA6300 / MW-3  
Program: No: 0215M004335\_P00001

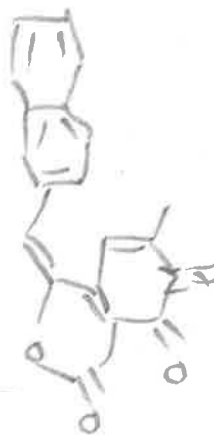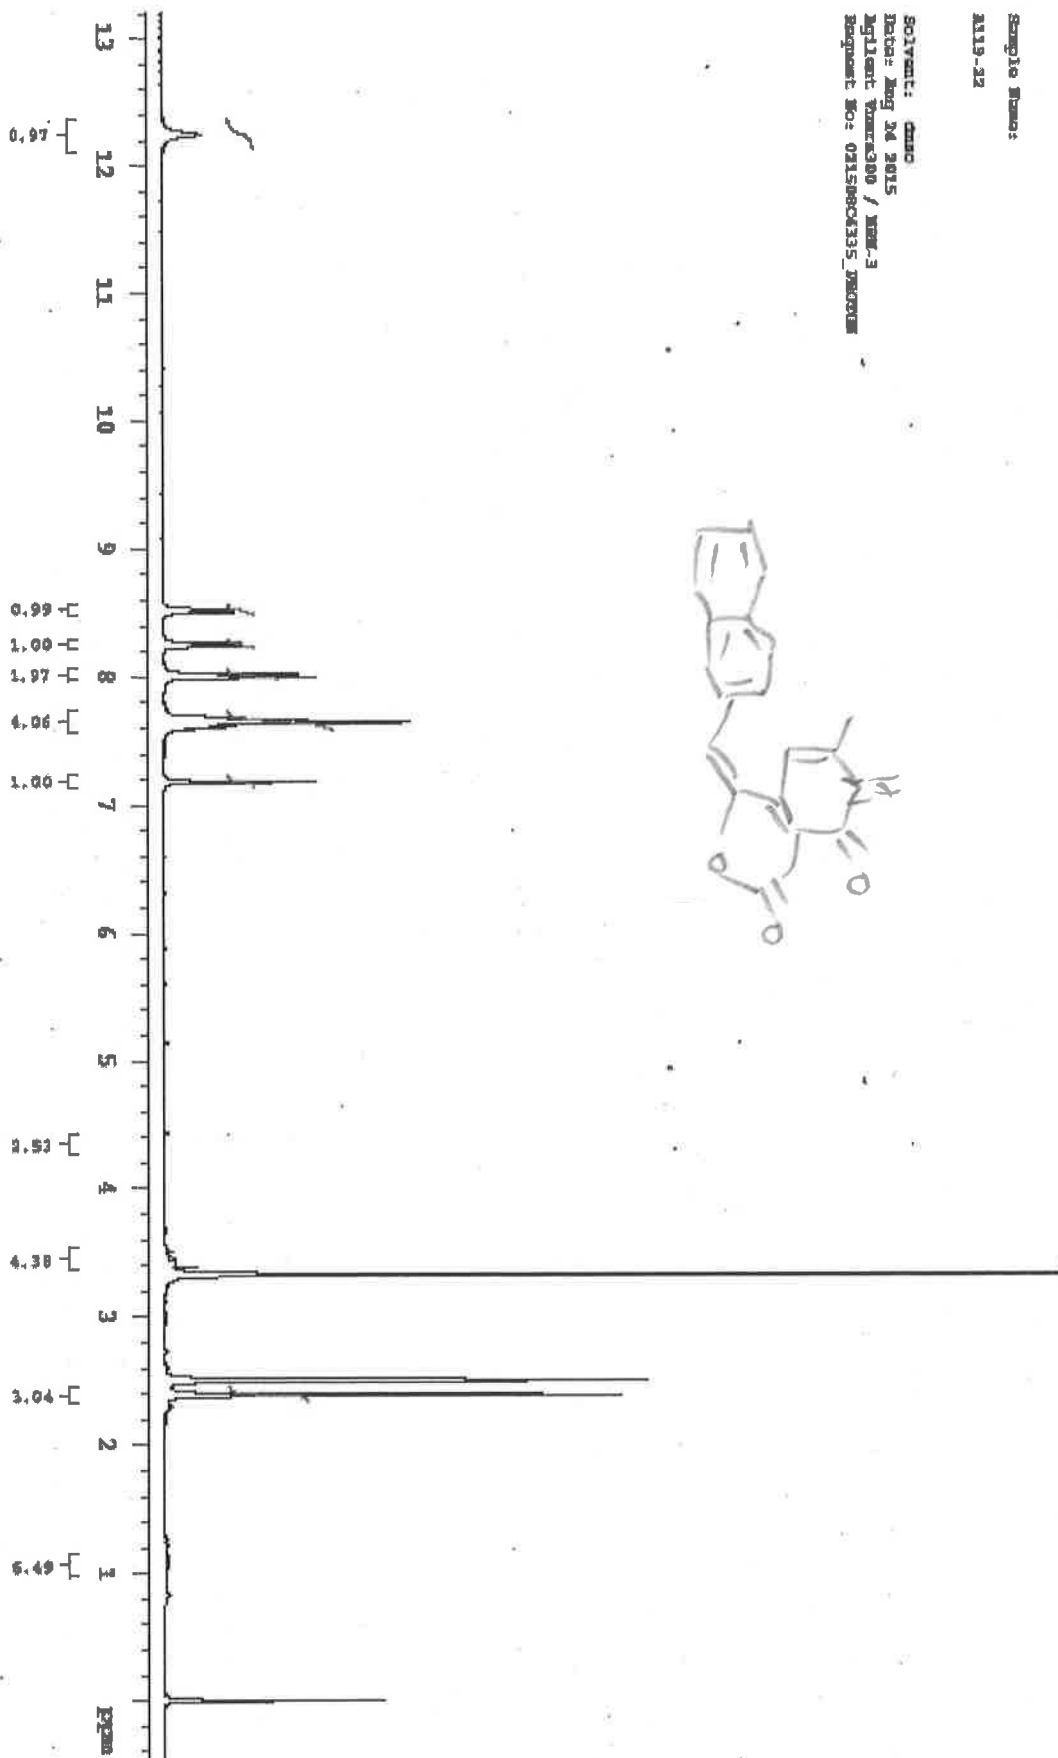

Program: 0215M004335\_P00001\_01\_P10001



Sample Name:  
1110-23

Solvent: DMF  
Date: May 24 2005  
Time: 10:30 / 11:3  
Sample No: 0115002348

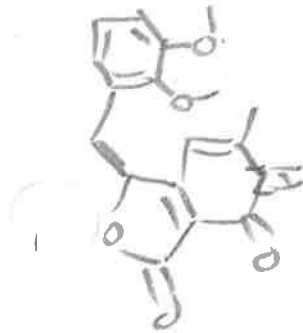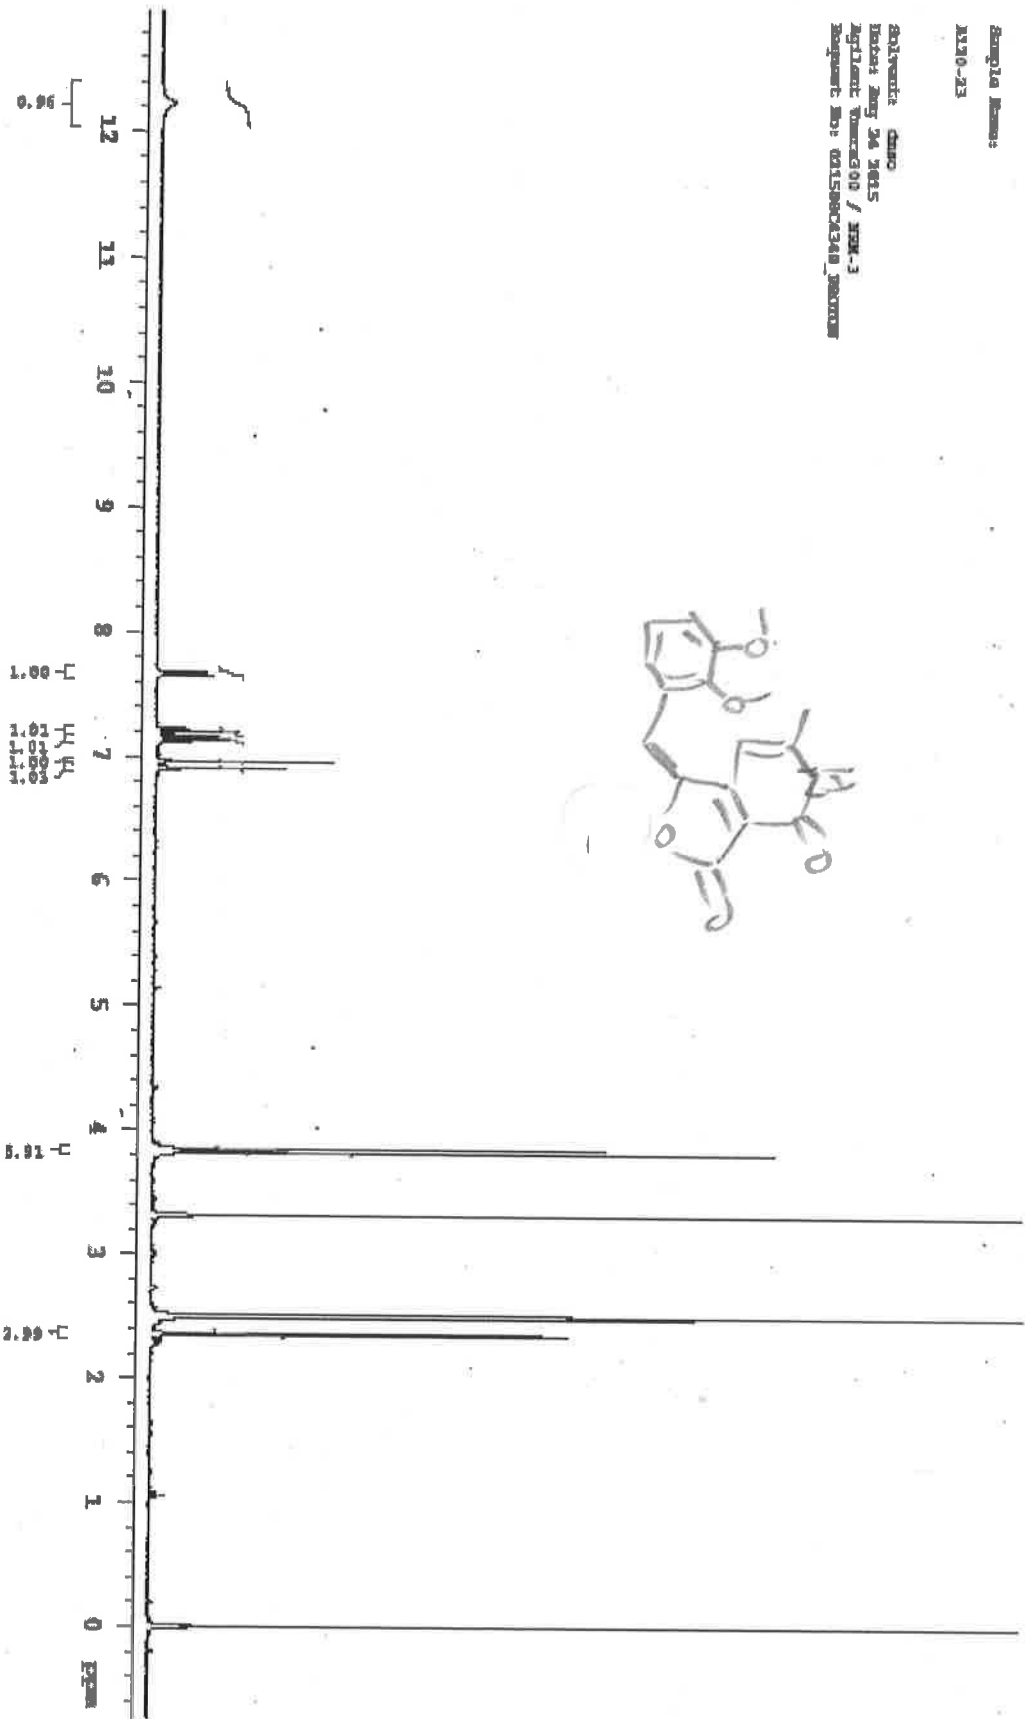

0115002348\_1110-23\_1110-23

Sample Name:  
M119-27

Solvent: CDCl<sub>3</sub>  
 Date: Aug 28 2015  
 Millant Name: 300 / 100-3  
 Experiment No: 0215080173\_P10001

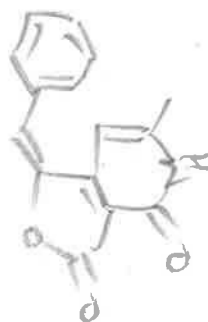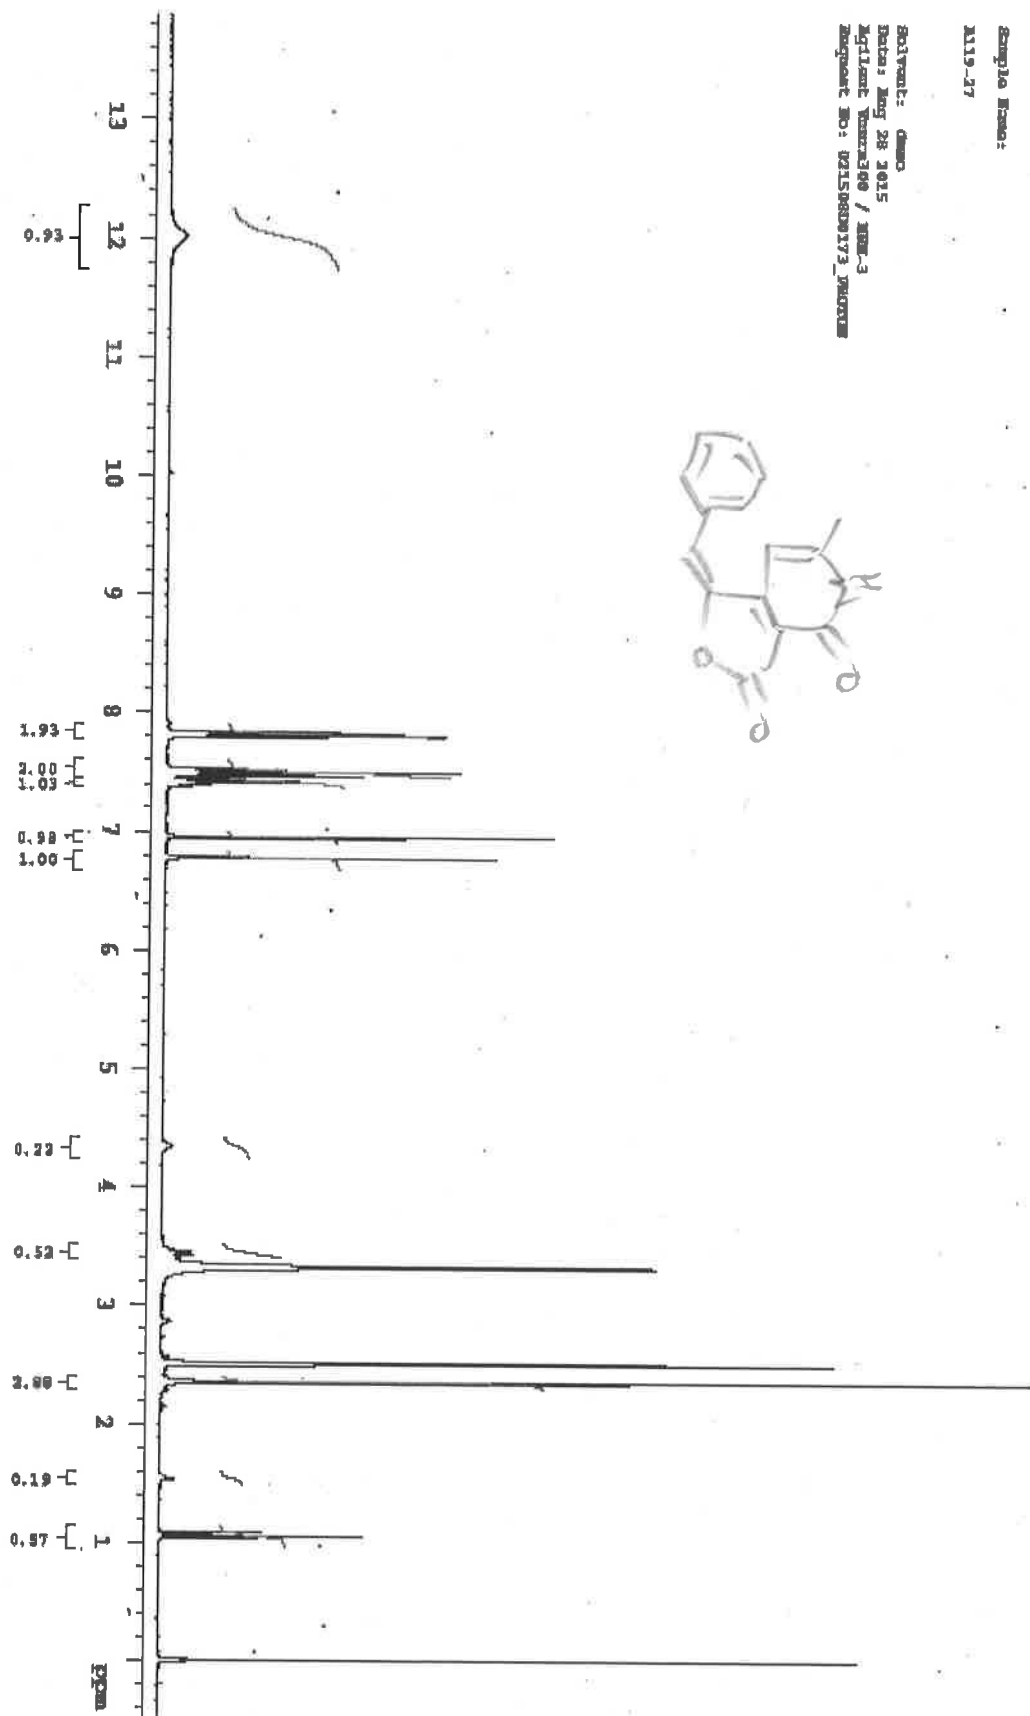

Experiment: 0215080173\_P10001\_01\_P10001

Sample Name:

Solvent: CDCl<sub>3</sub>  
Date: Nov 4 2015  
Agilent: 600-MHz / NMR-3  
Acquisition No: 02151144411\_P10708

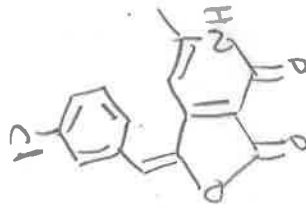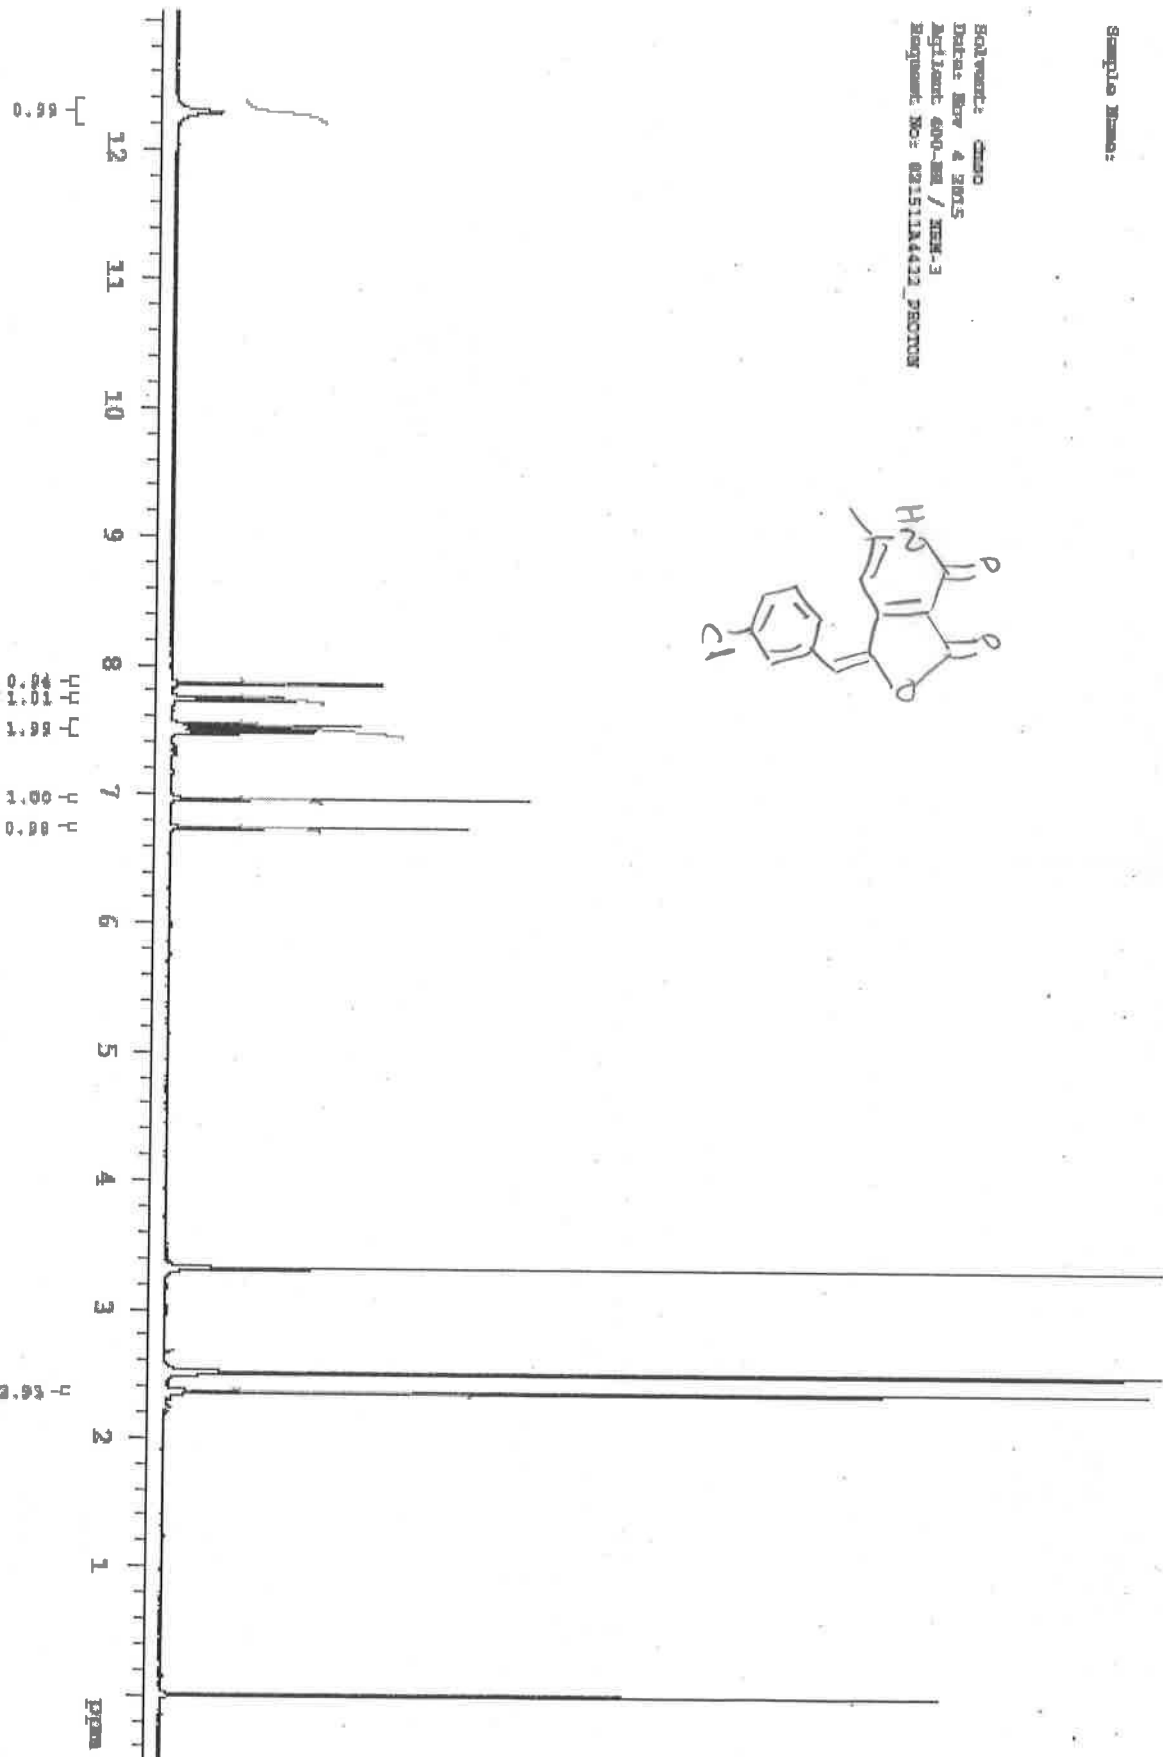

Filename: 02151144411\_P10708\_01\_02151144411

Sample Name:

Solvent:  $CDCl_3$   
Date: Nov 4 2015  
Agilent: 400-MR / NMR-3  
Request ID: 0215114424\_PROTON

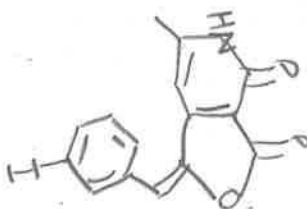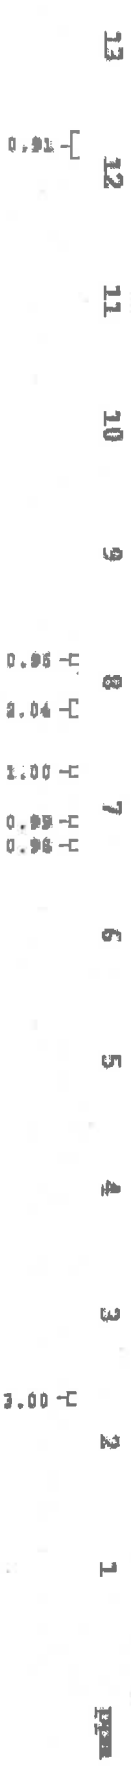

0215114424\_PROTON\_01.P1CH01

Sample Name:  
A122-15-3

Solvent: CDCl<sub>3</sub>  
Inlet No: 4 2015  
Agilent: 400-MHz / NMR-3  
Acq: 021511A4438\_PROTON

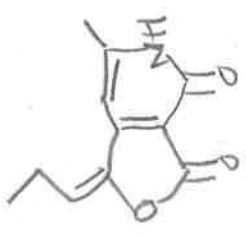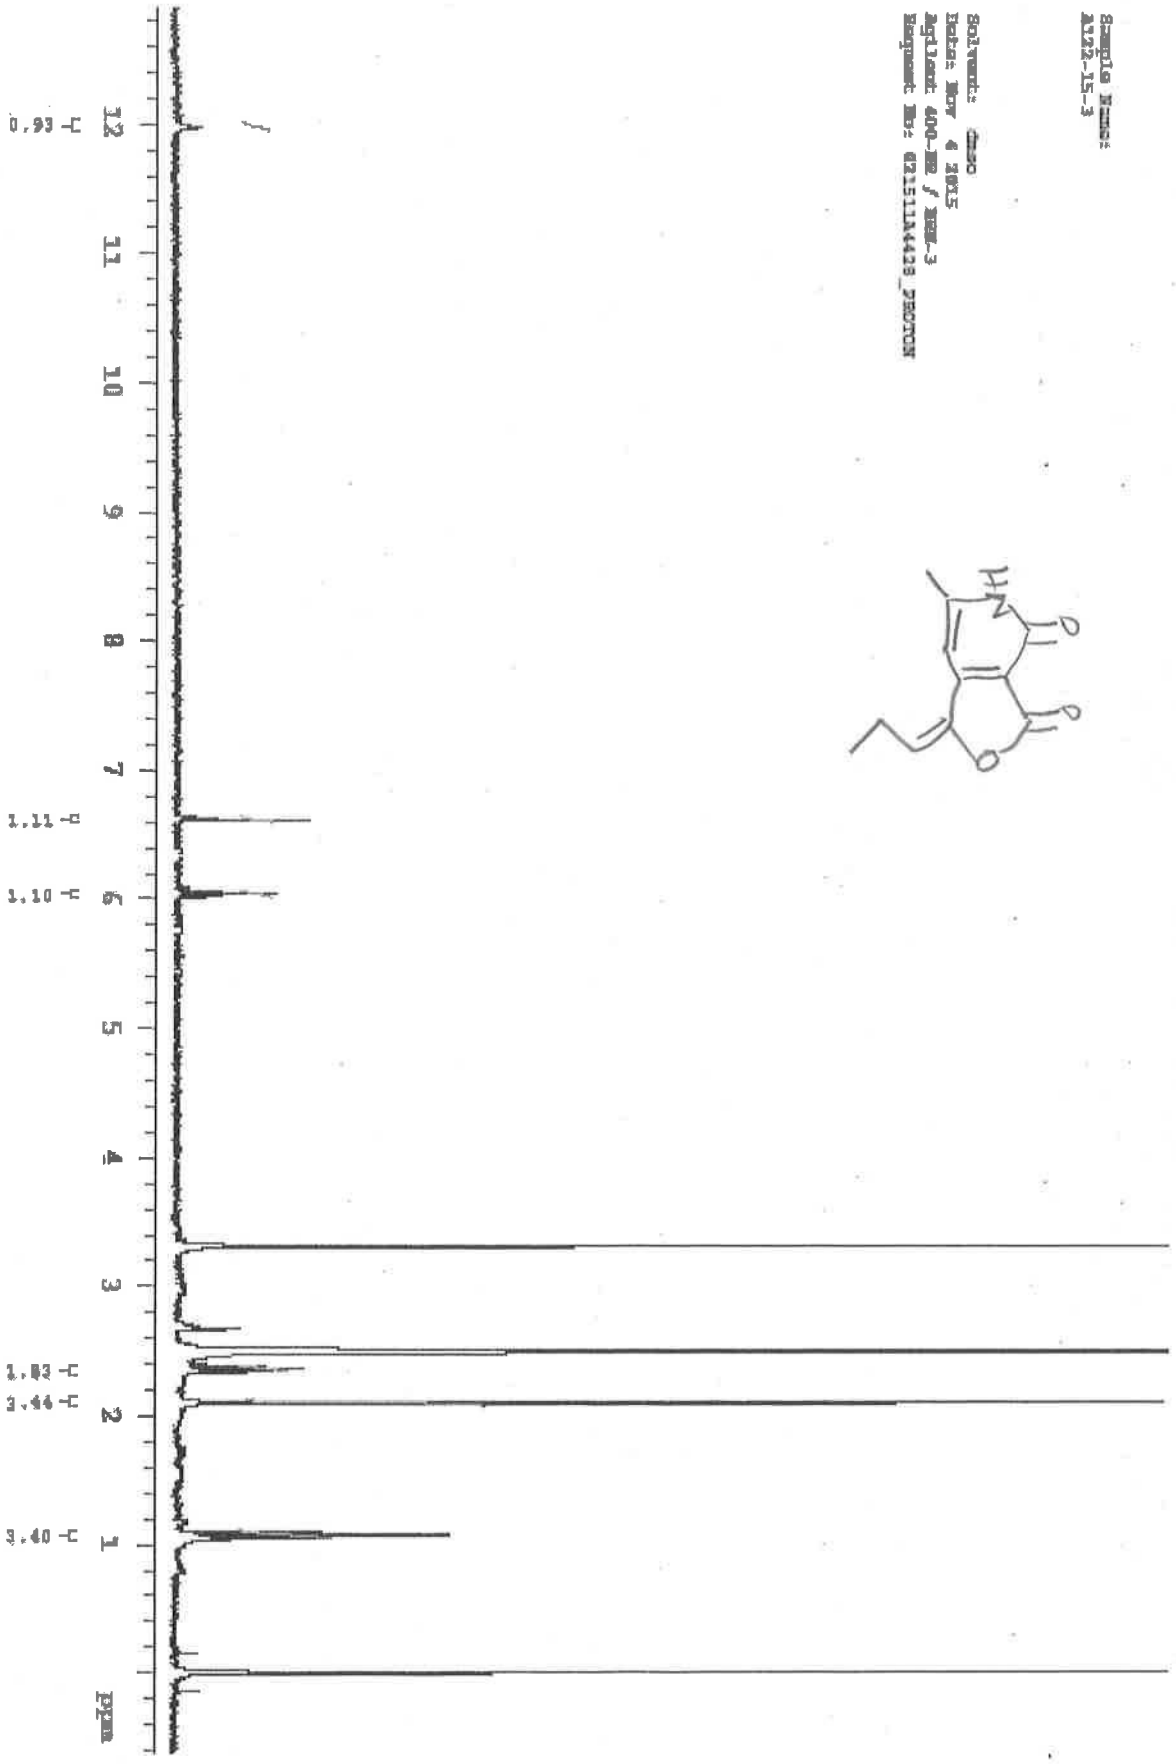

021511A4438\_PROTON\_01\_PROTON

Sample Name:

Solvent: CDCl<sub>3</sub>  
Pulse: NOY 6 JMS  
Agilent 400-MH / NMR-3  
Request No: 021511A736\_PROTON

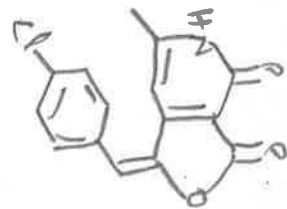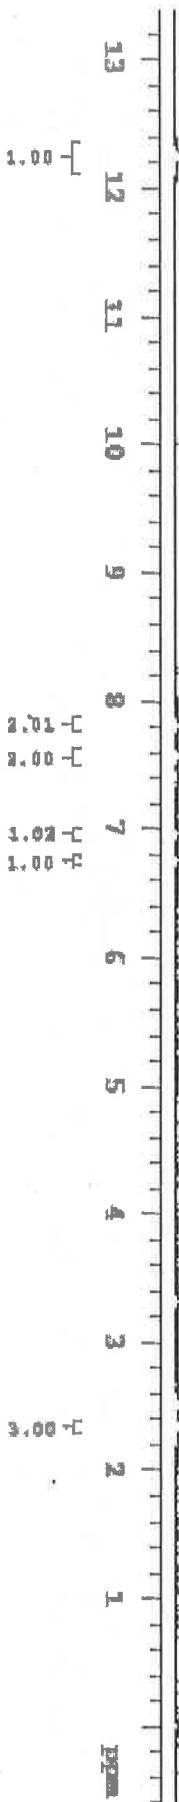

Pathname: 021511A736\_PROTON\_01\_H1.MR1

Sample Name:  
2130-7-1

Solvent: CDCl3  
Date: Nov 7 2015  
Applicant: 400-MG / NMR-3  
Request No: 0215117355\_PROTON

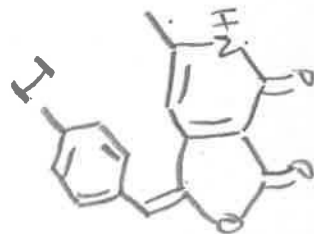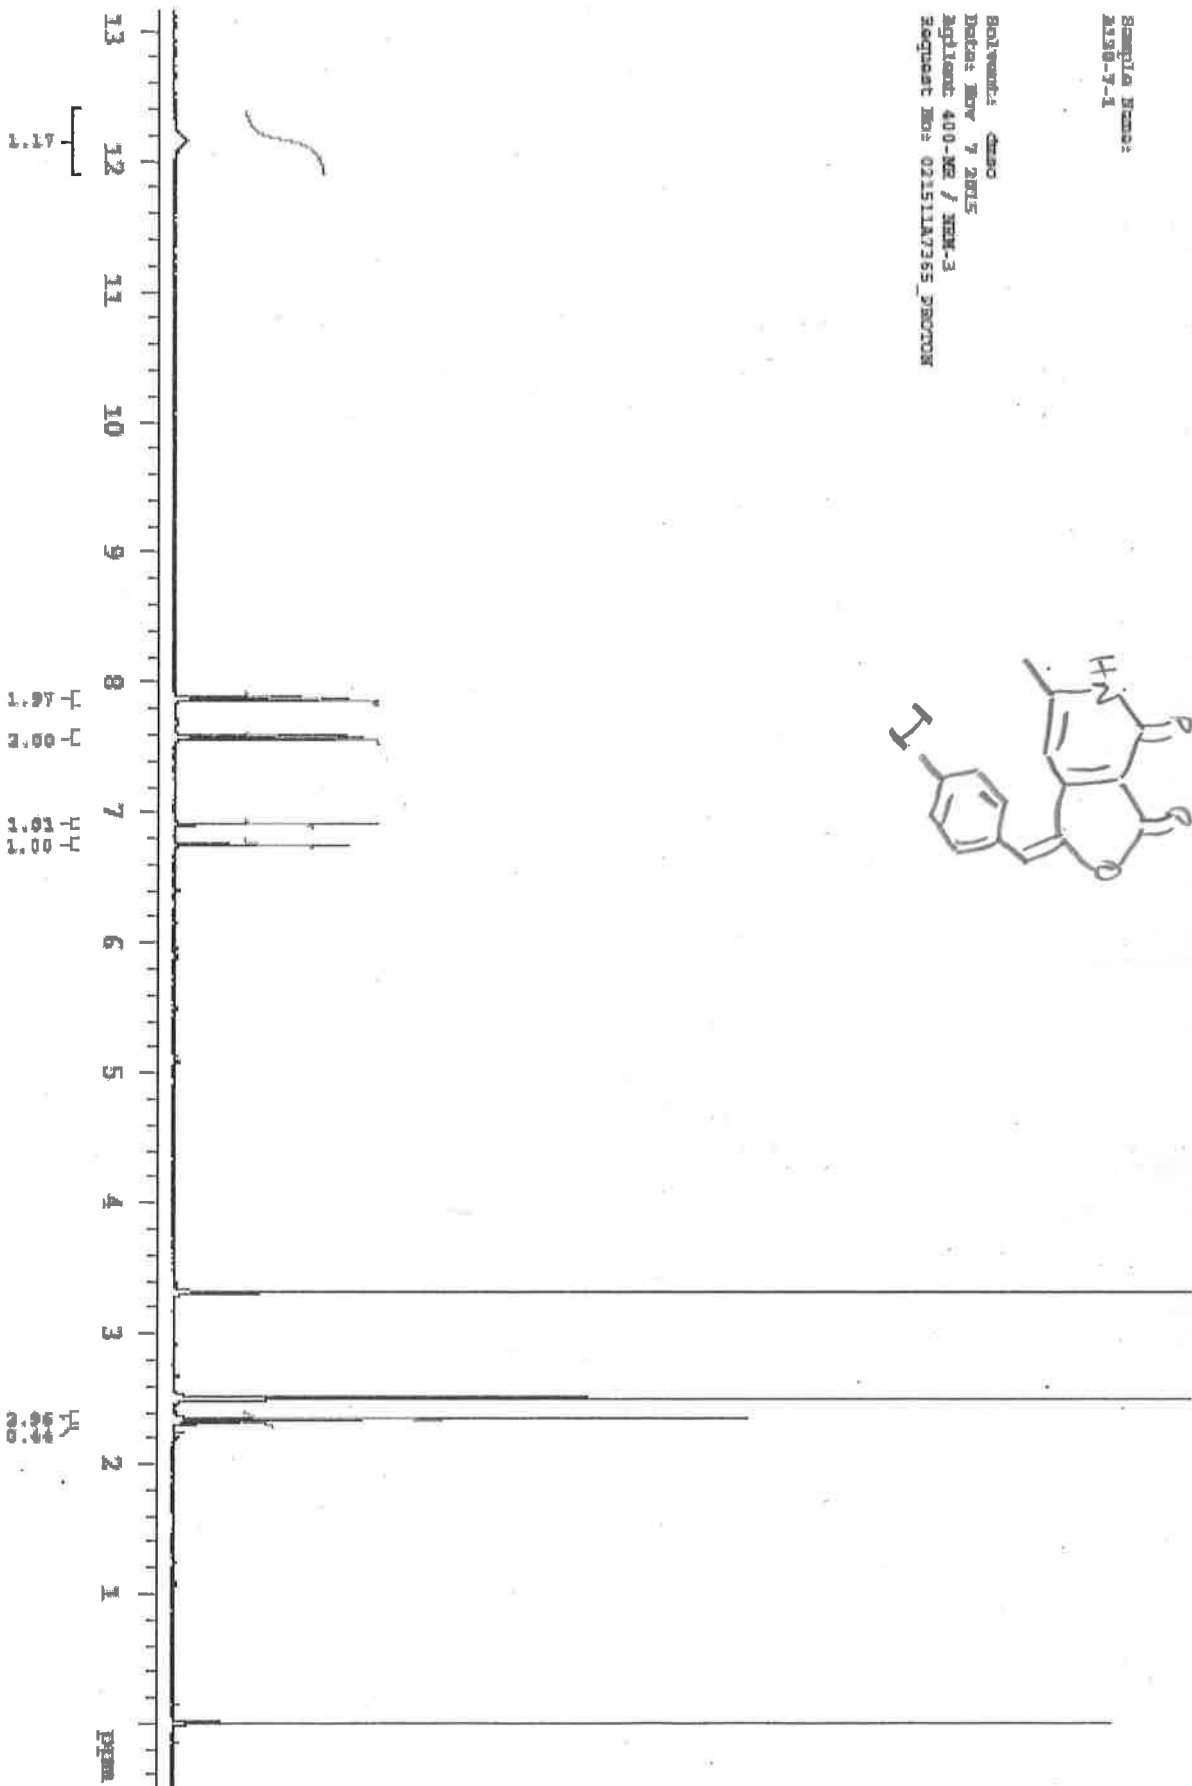

Filename: 0215117355\_PROTON\_01\_P00001

Sample Name:

Solvent: DMSO  
Date: Nov 6 2015  
Applicant: VandenBrouck / MW-3  
Request No: 0215117353\_P00000

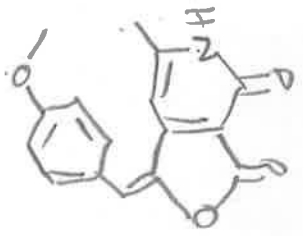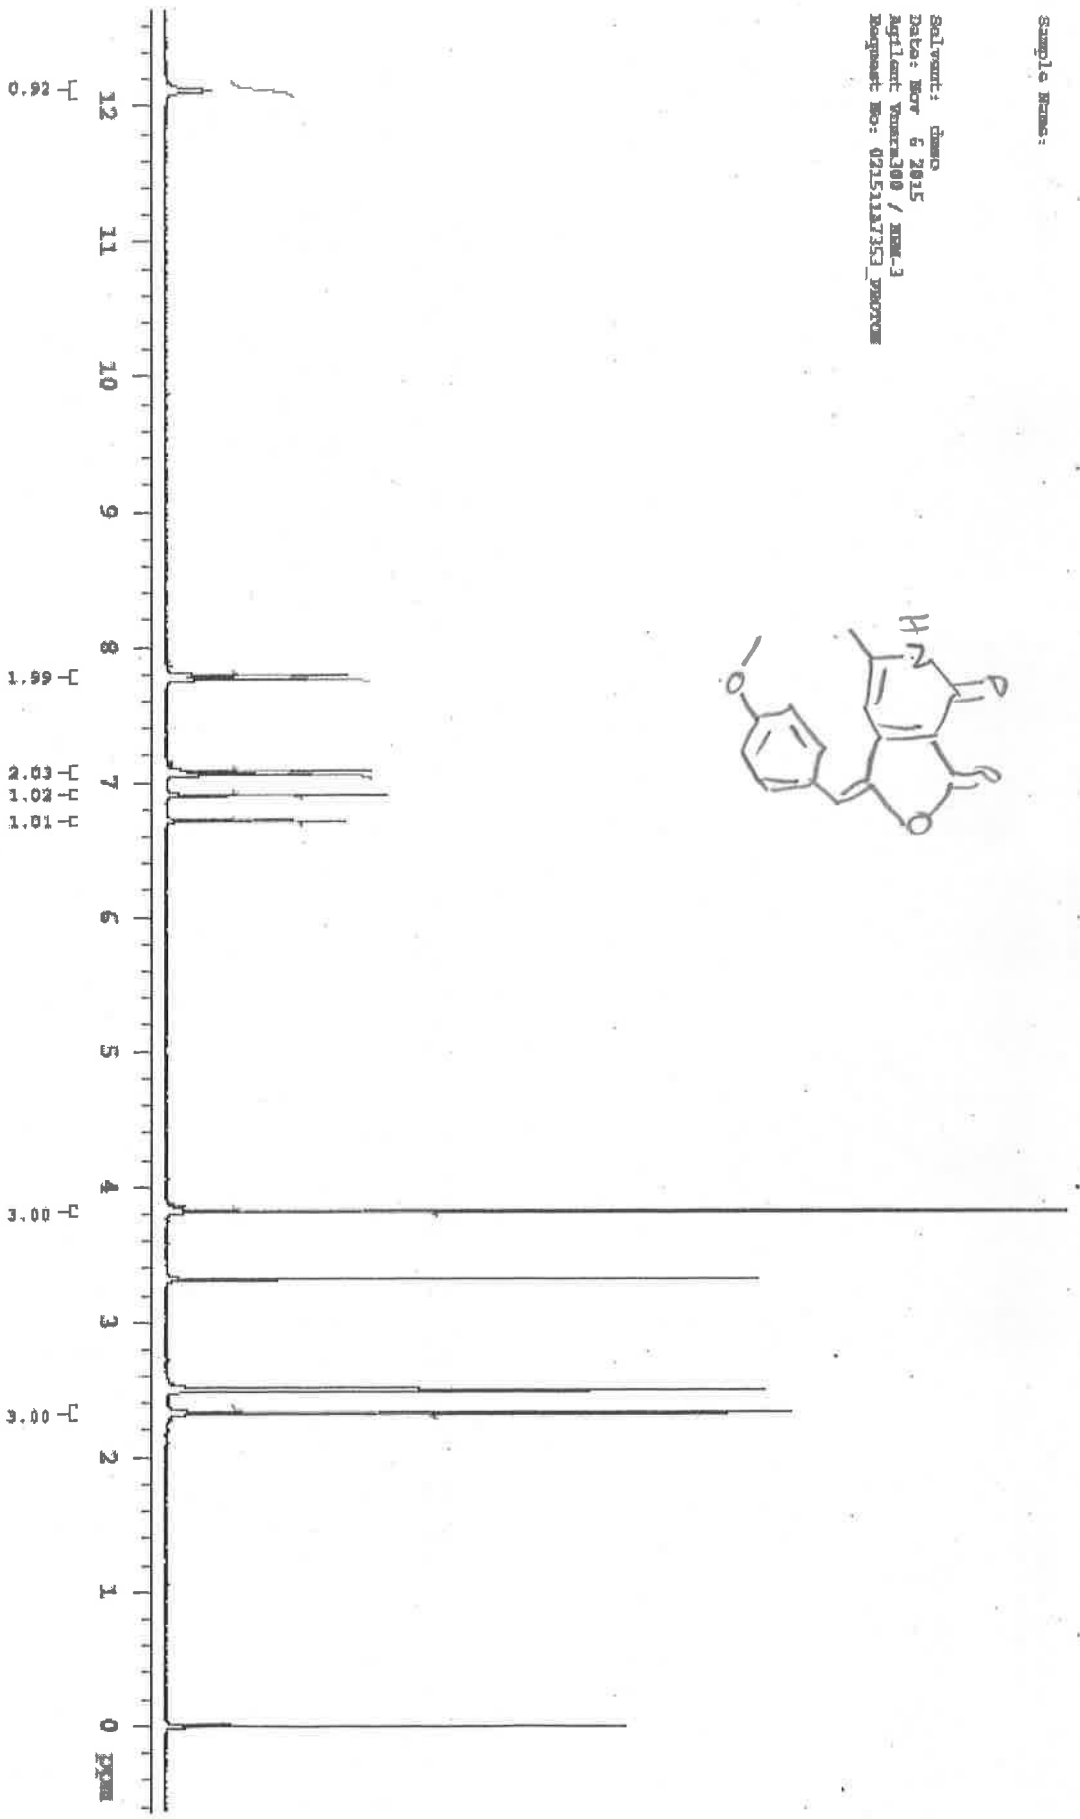

0215117353\_P00000\_01\_P100001



Sample Name:

Solvent: DMSO  
Date: Nov 6 2015  
Agilent 400-MZ / NMR-3  
Request No: 025117352\_PROTON

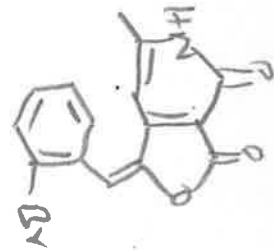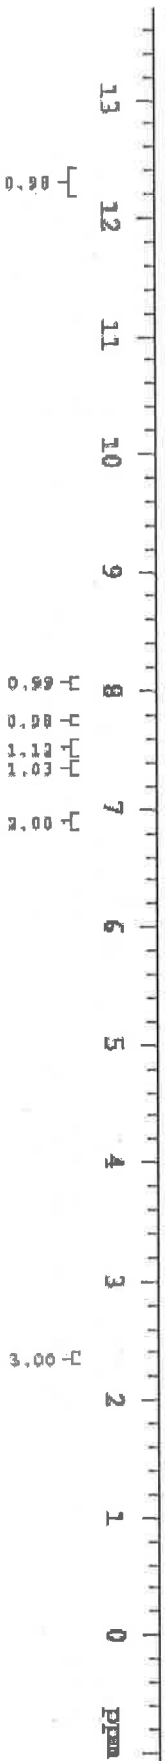

Program: 025117352\_PROTON\_01\_P10001

Sample Name:  
2119-16-1

Reference: 4200  
Date: Nov 6 2015  
Agilent 400-MR / NMR-1  
Inquest No: 0251117343\_PROTON

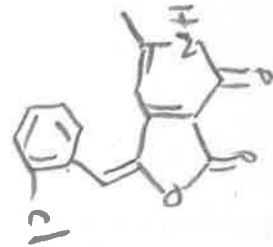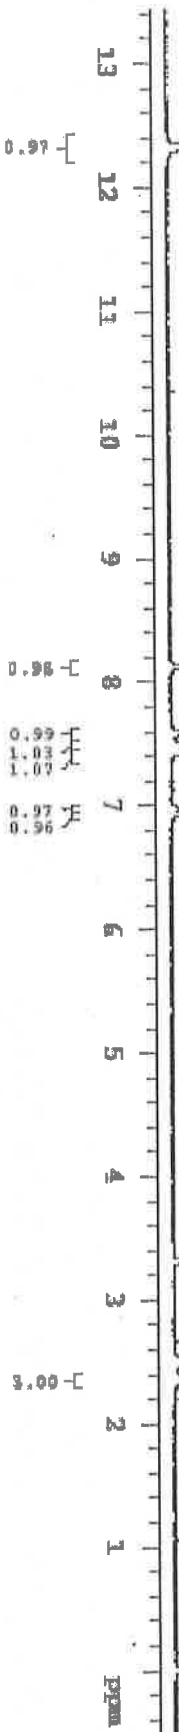

Filename: 0251117343\_PROTON\_01.proton

Compound 1

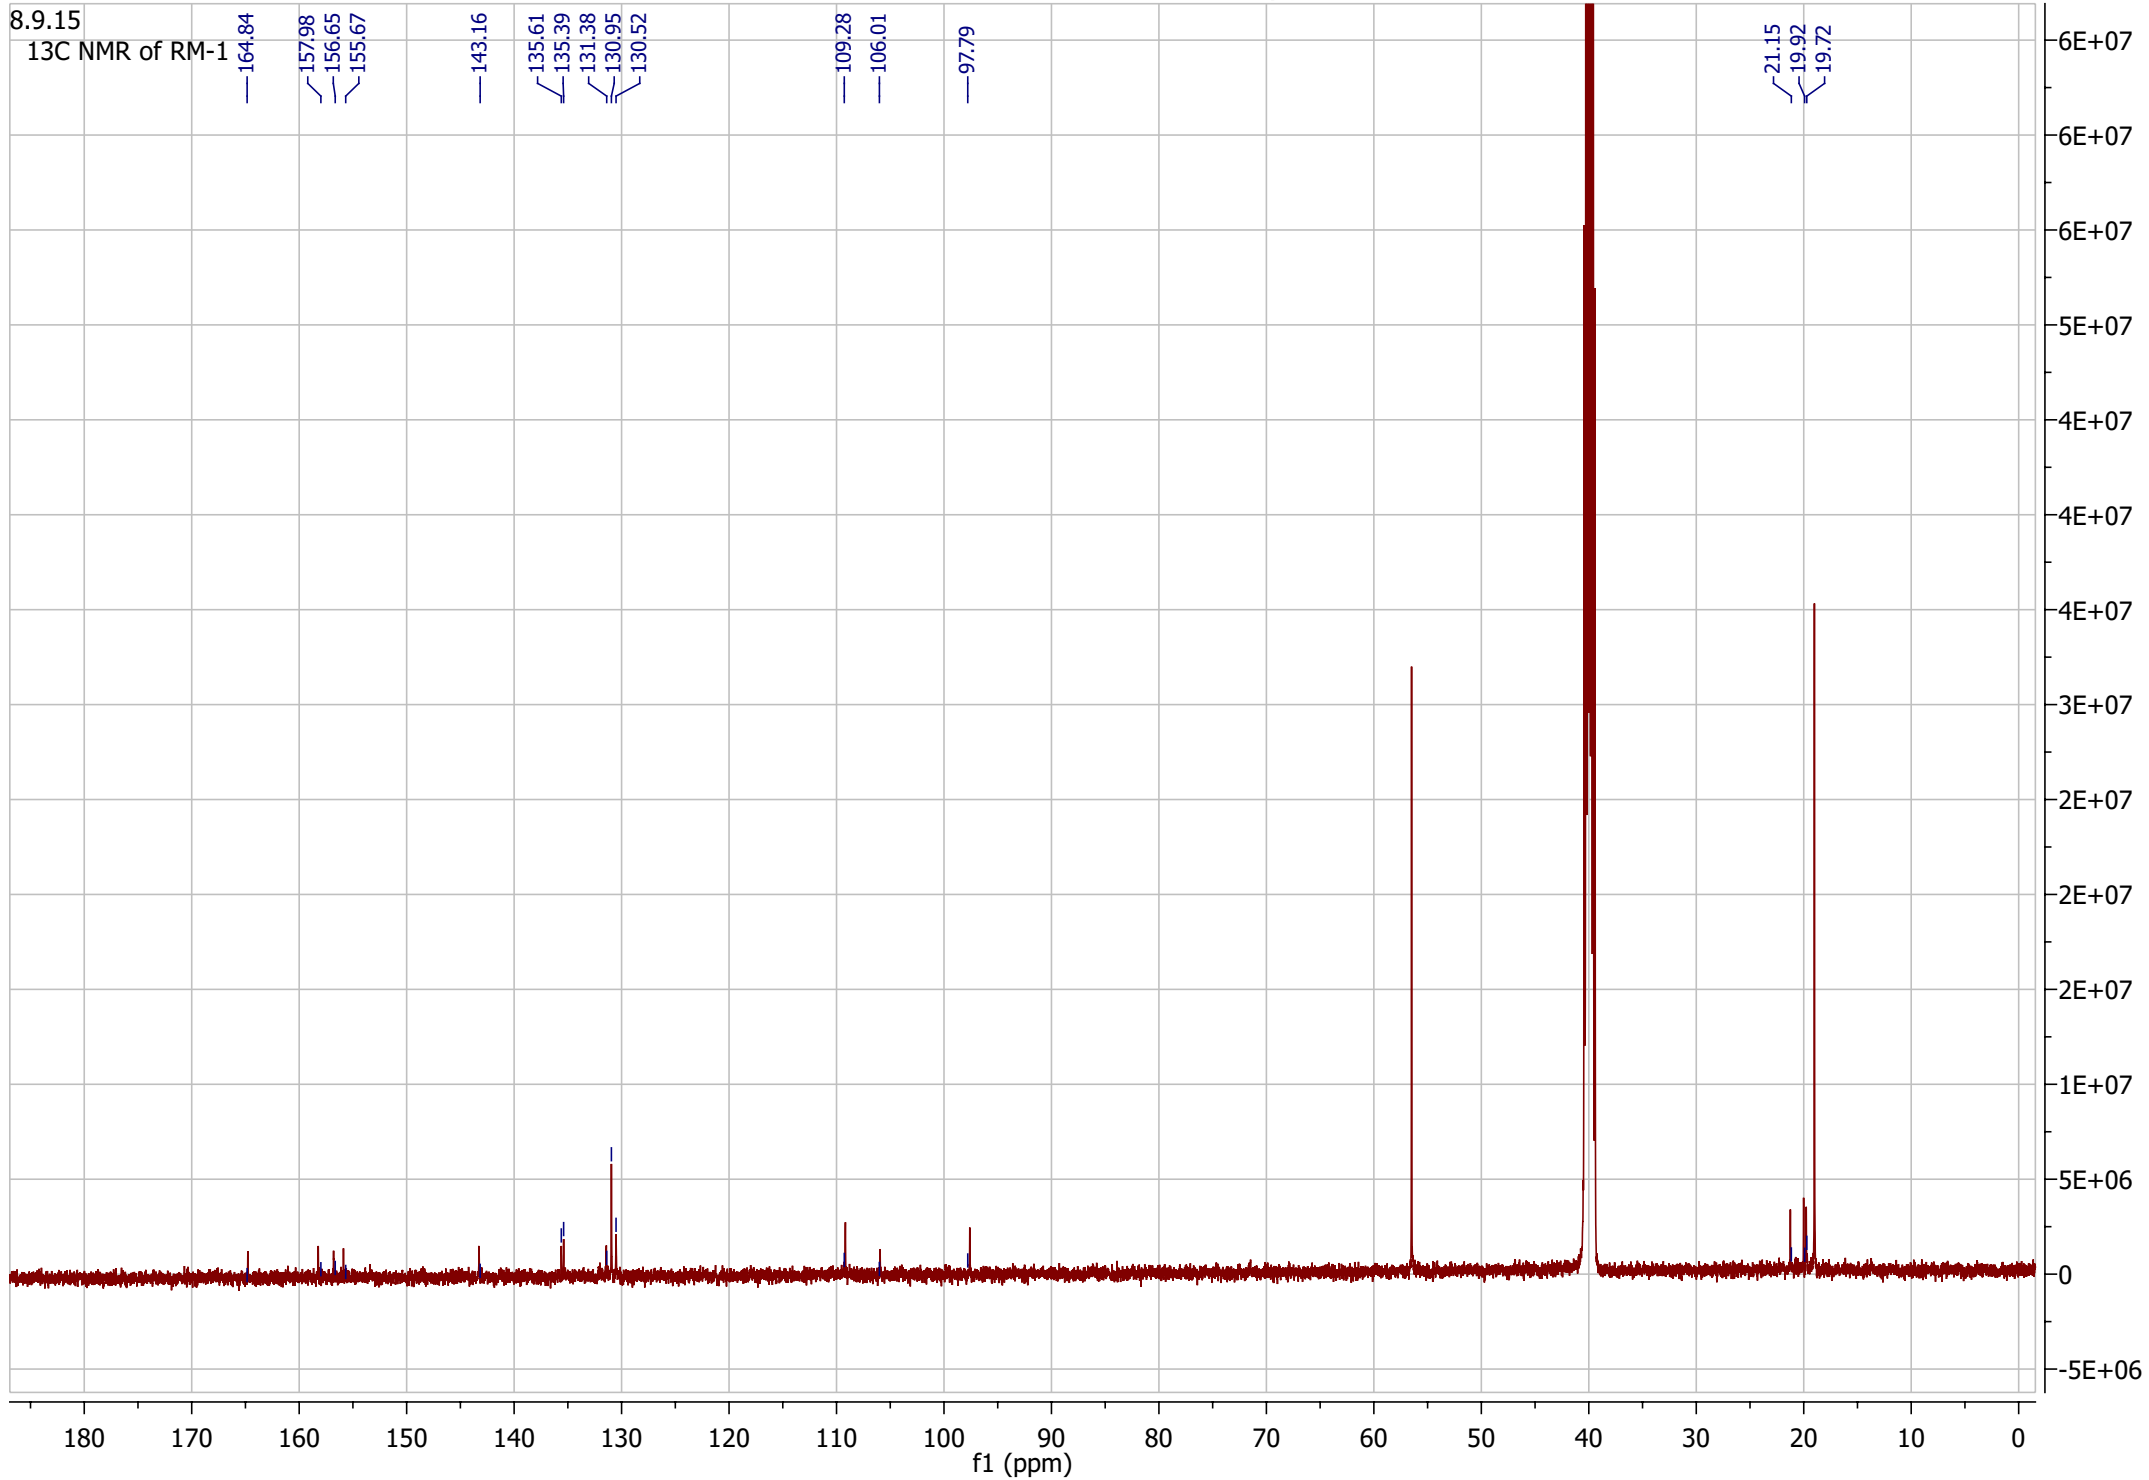

Comopund 2

8.9.15

<sup>13</sup>C NMR of RM 2

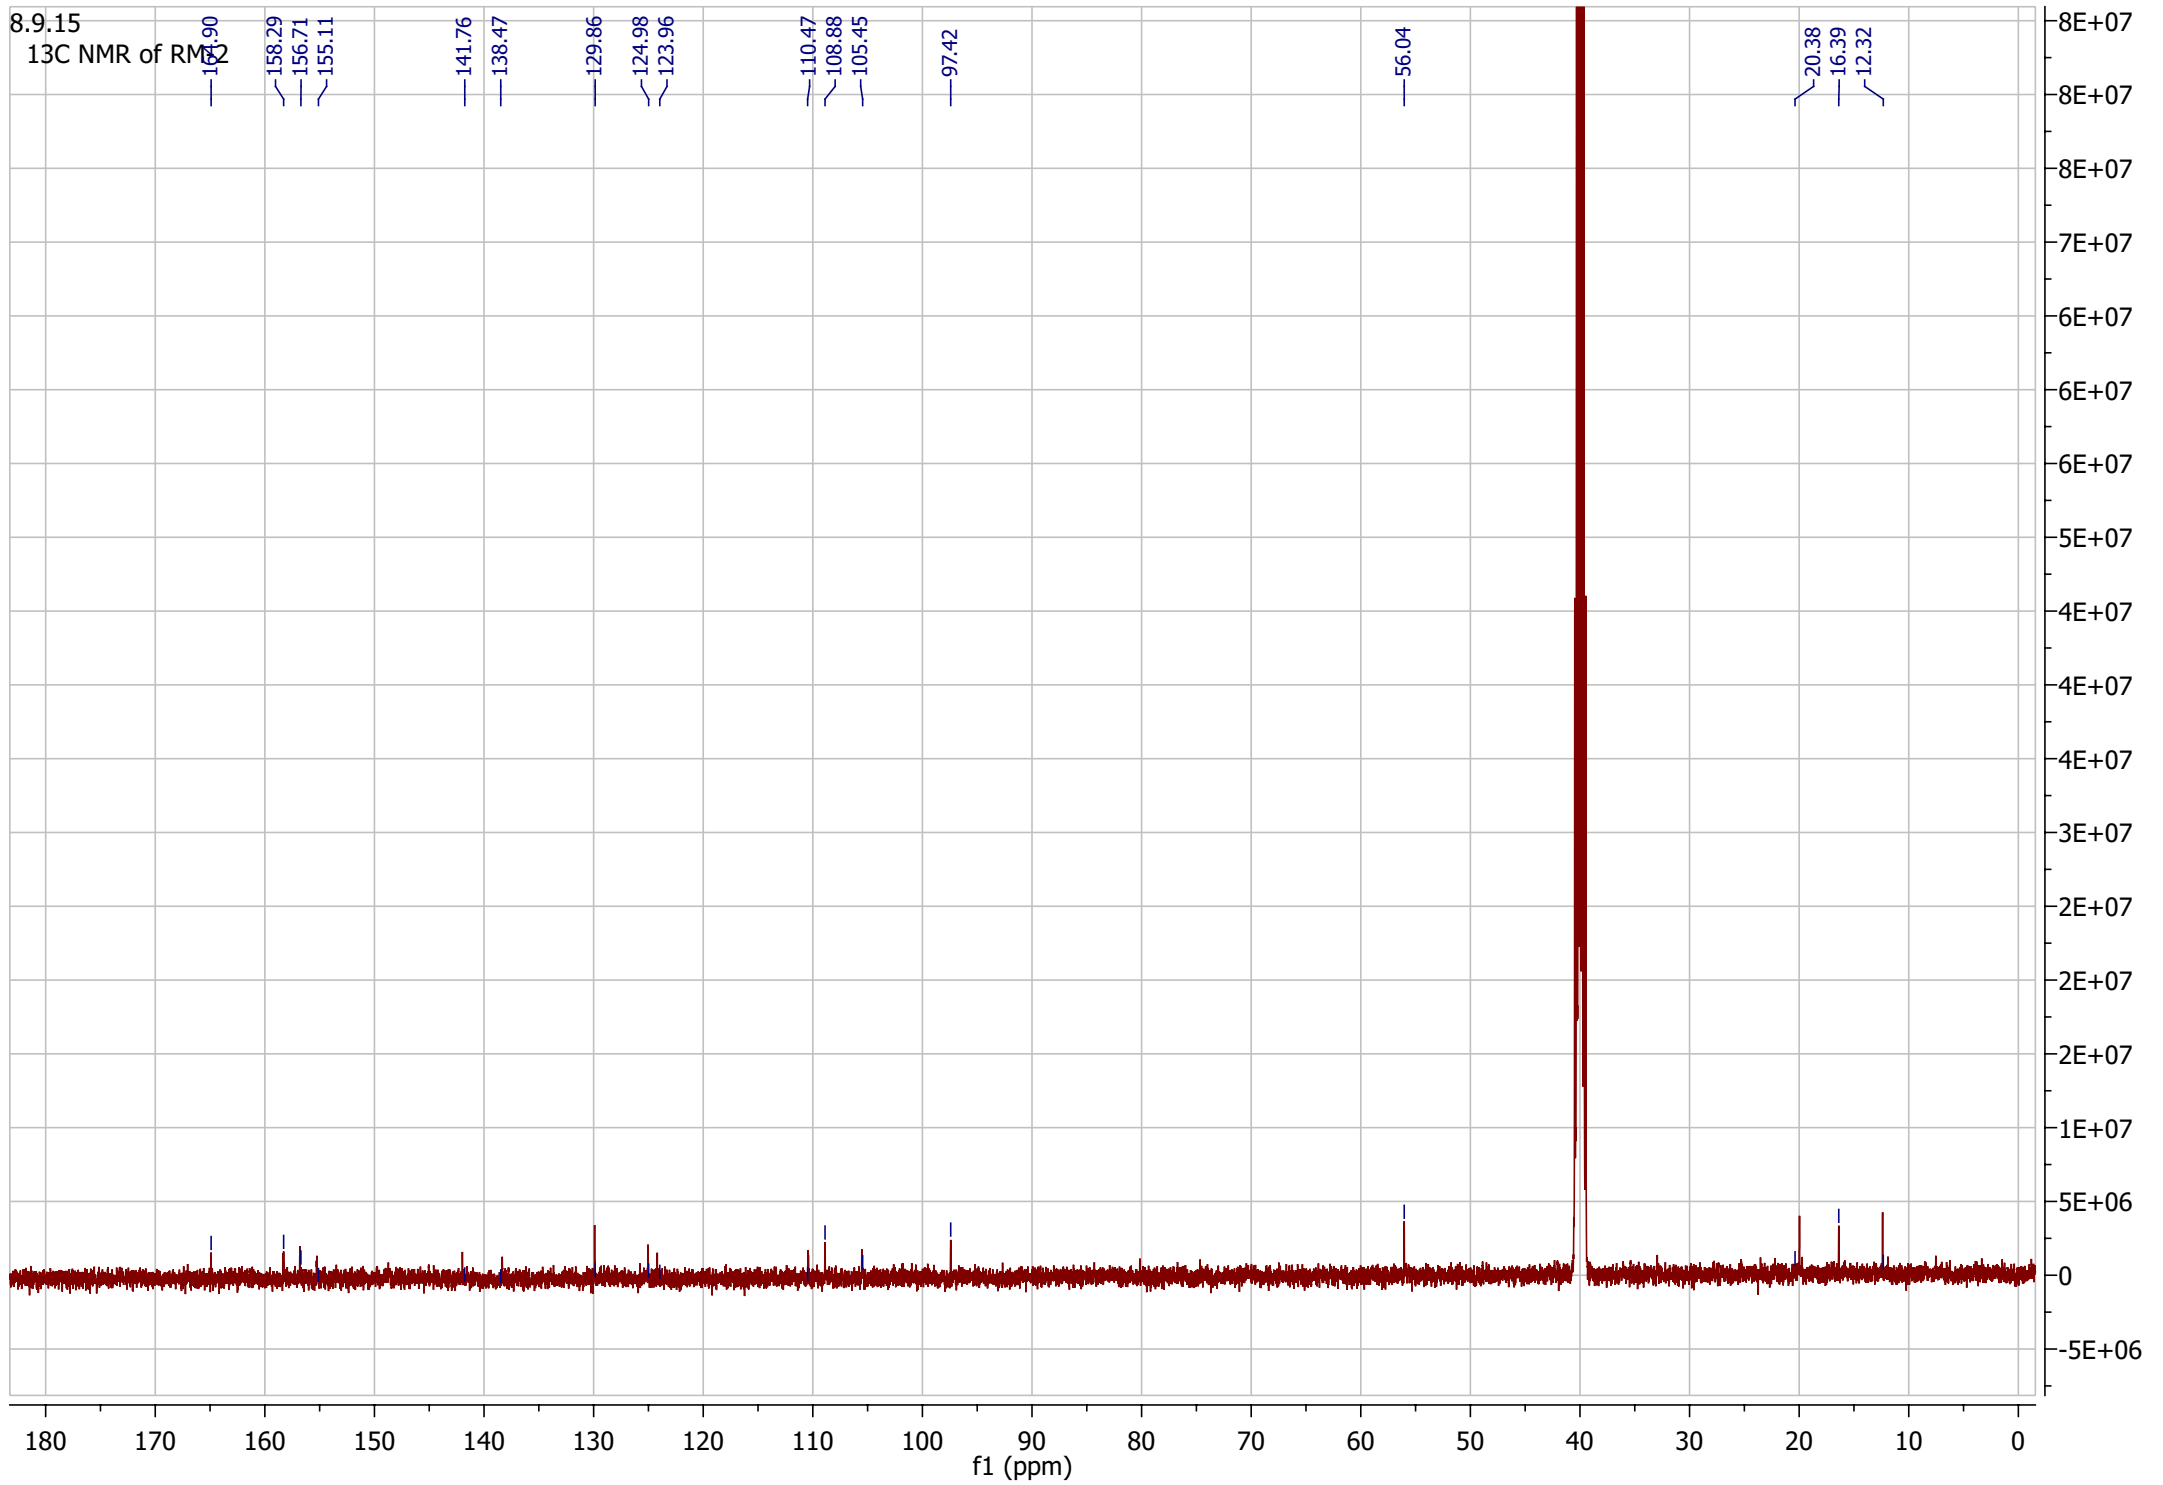

Compound 3

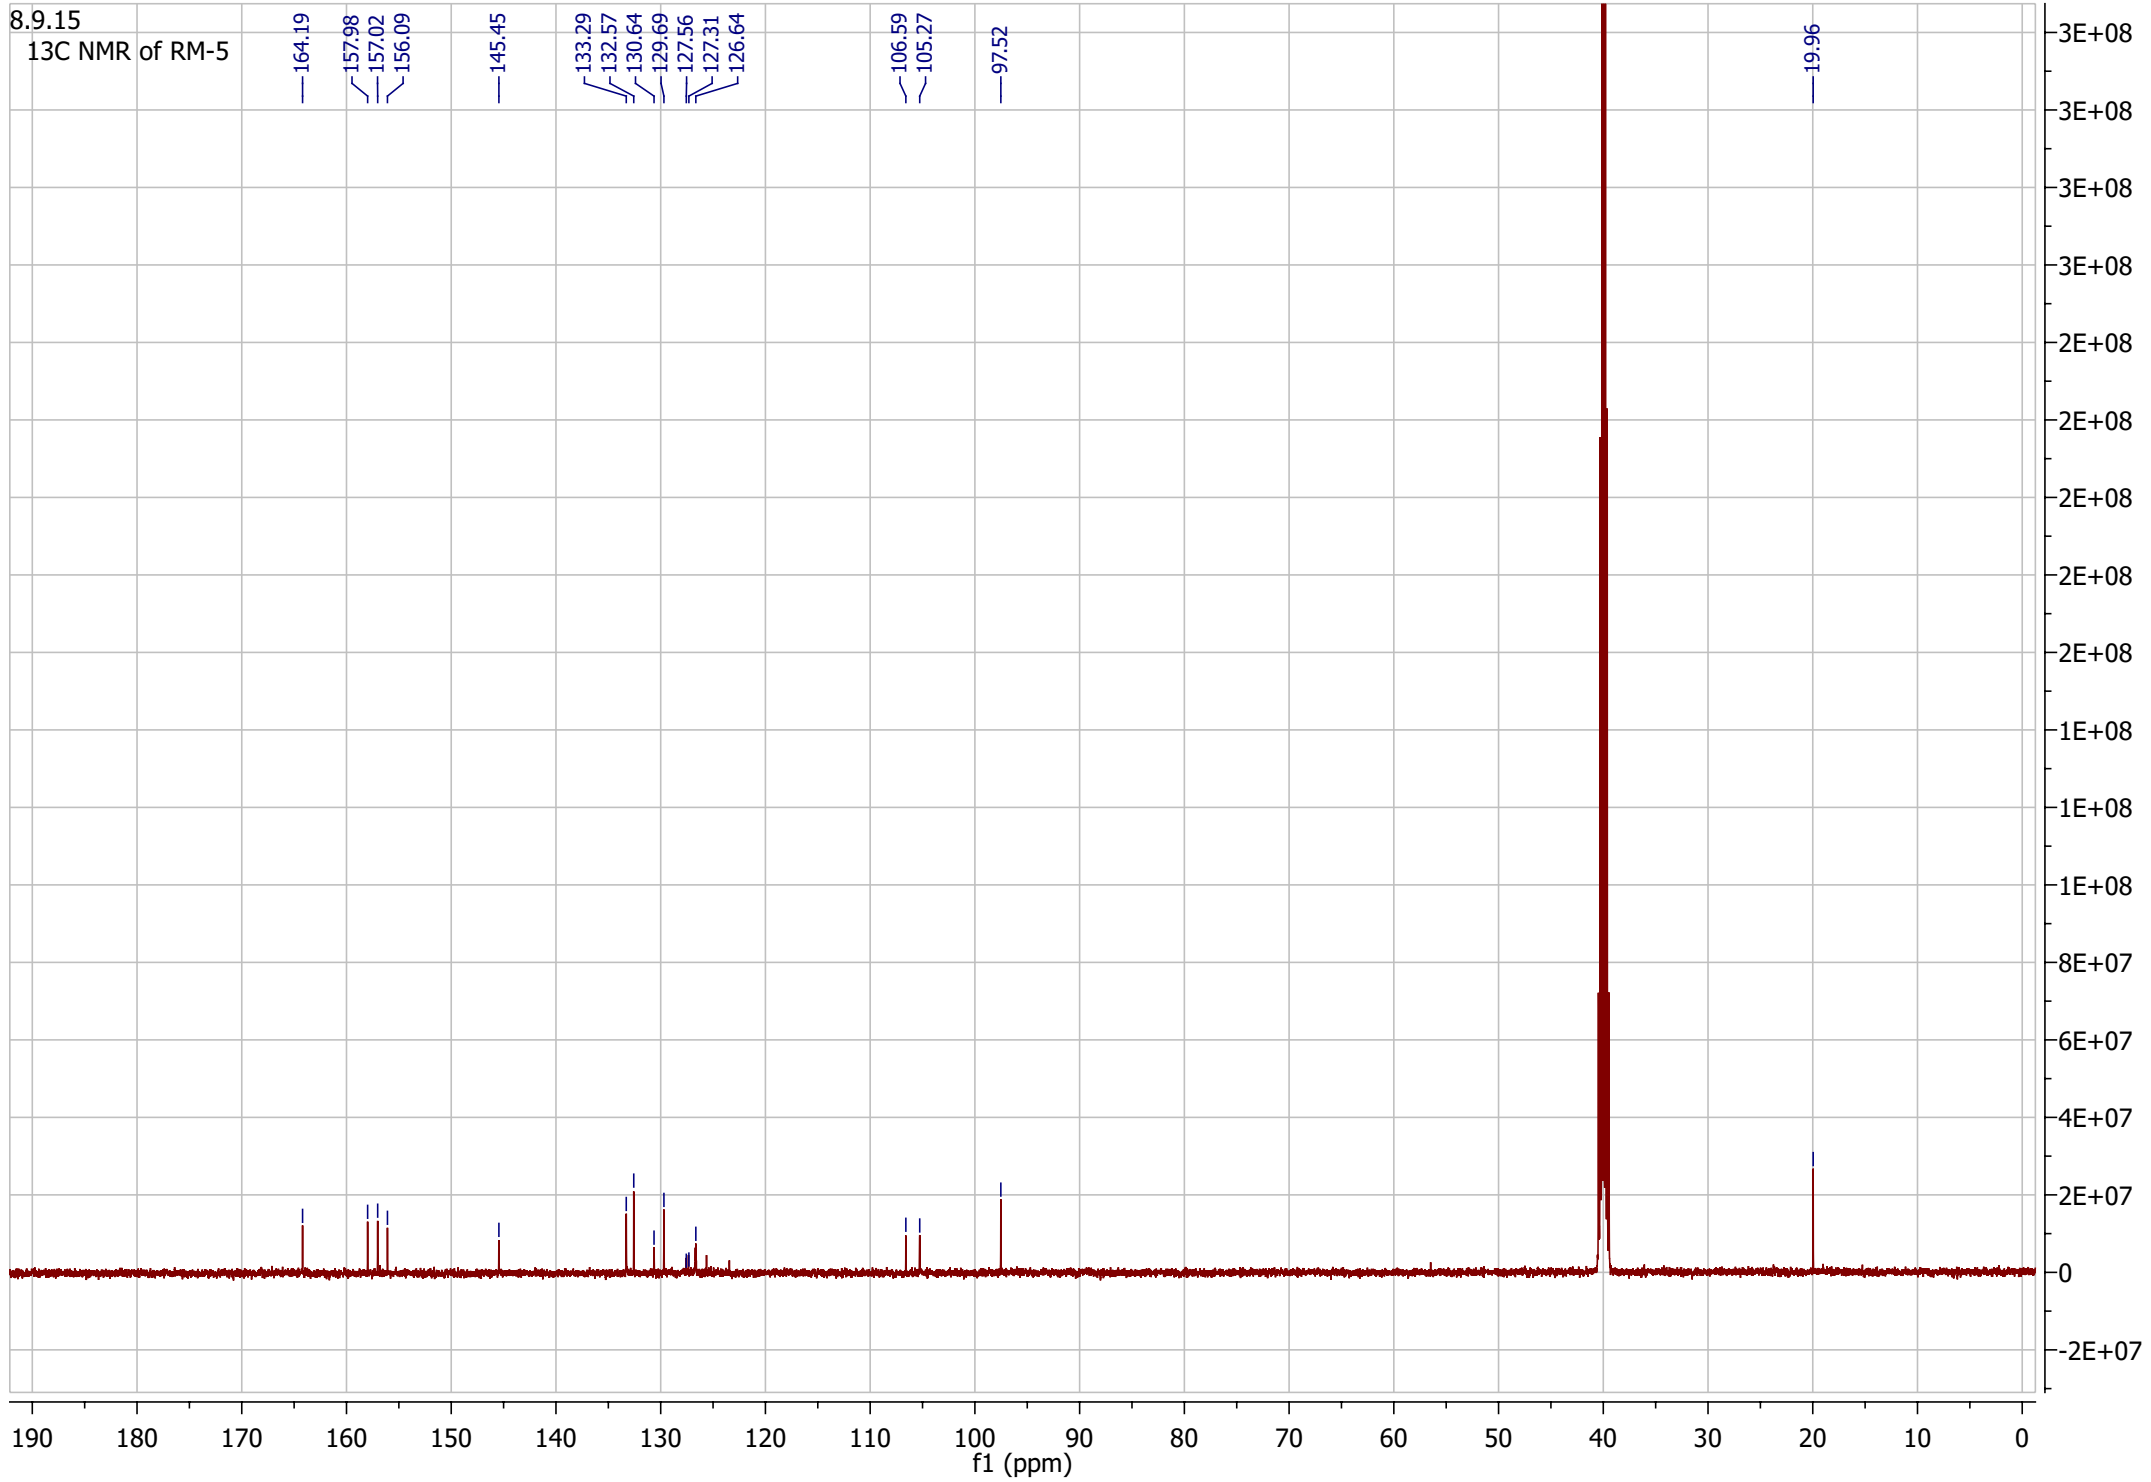

Compound 4

8.9.15  
13C NMR of RM-6

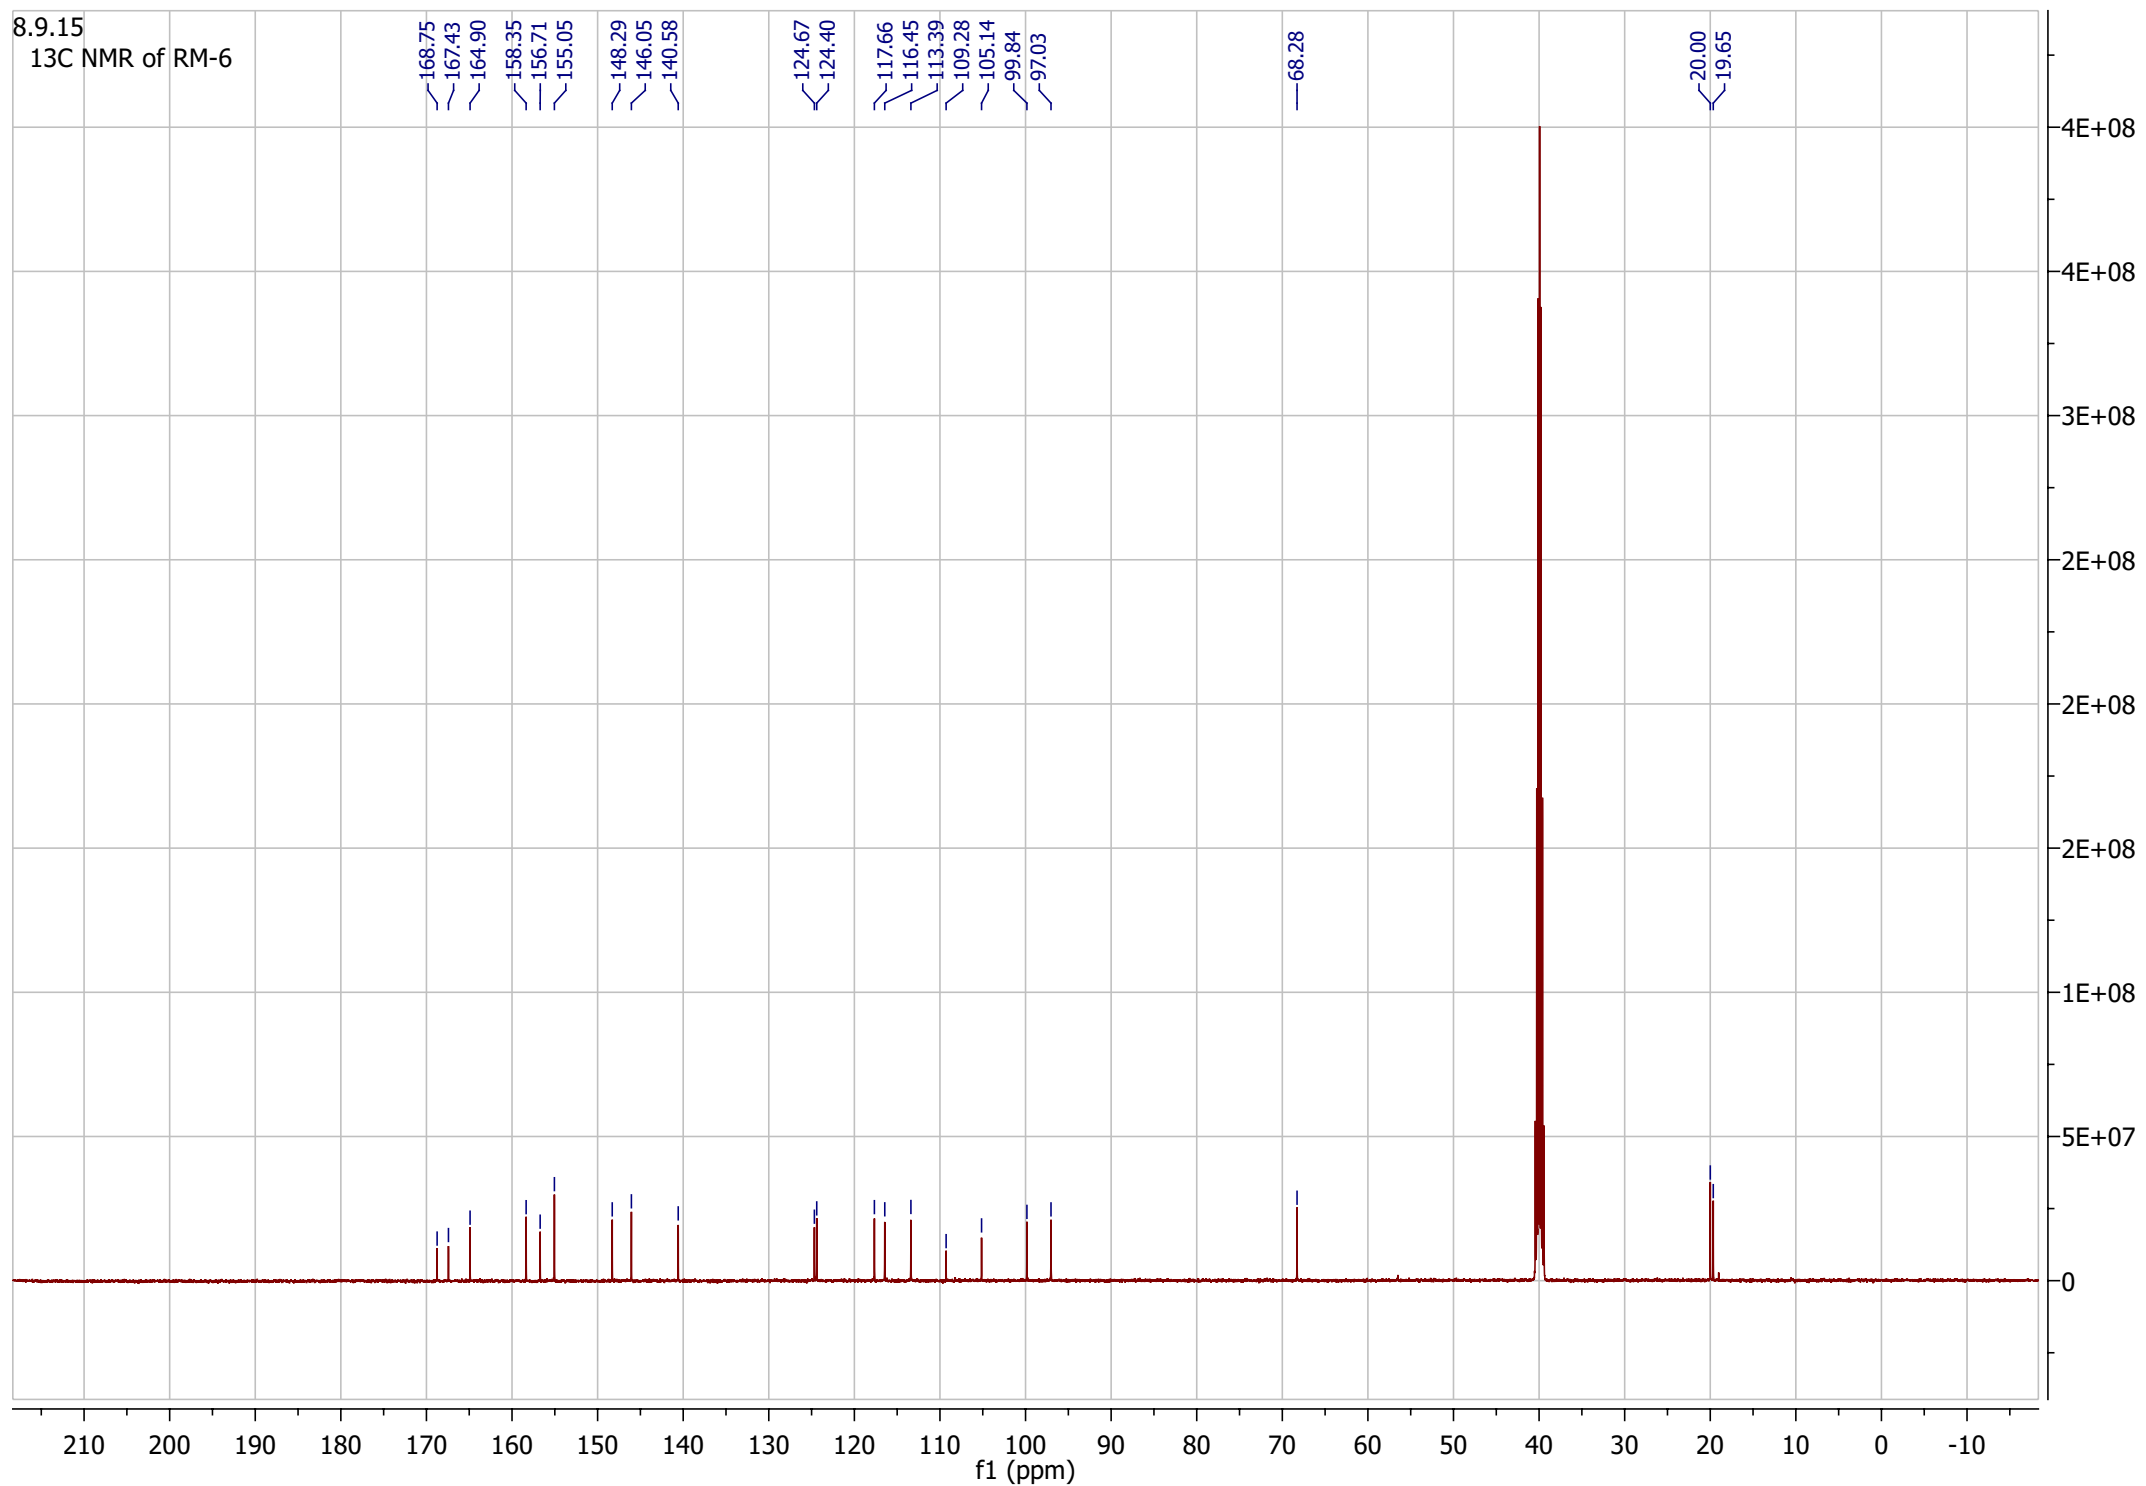

Compound 5

8.9.15

<sup>13</sup>C NMR of RM-7

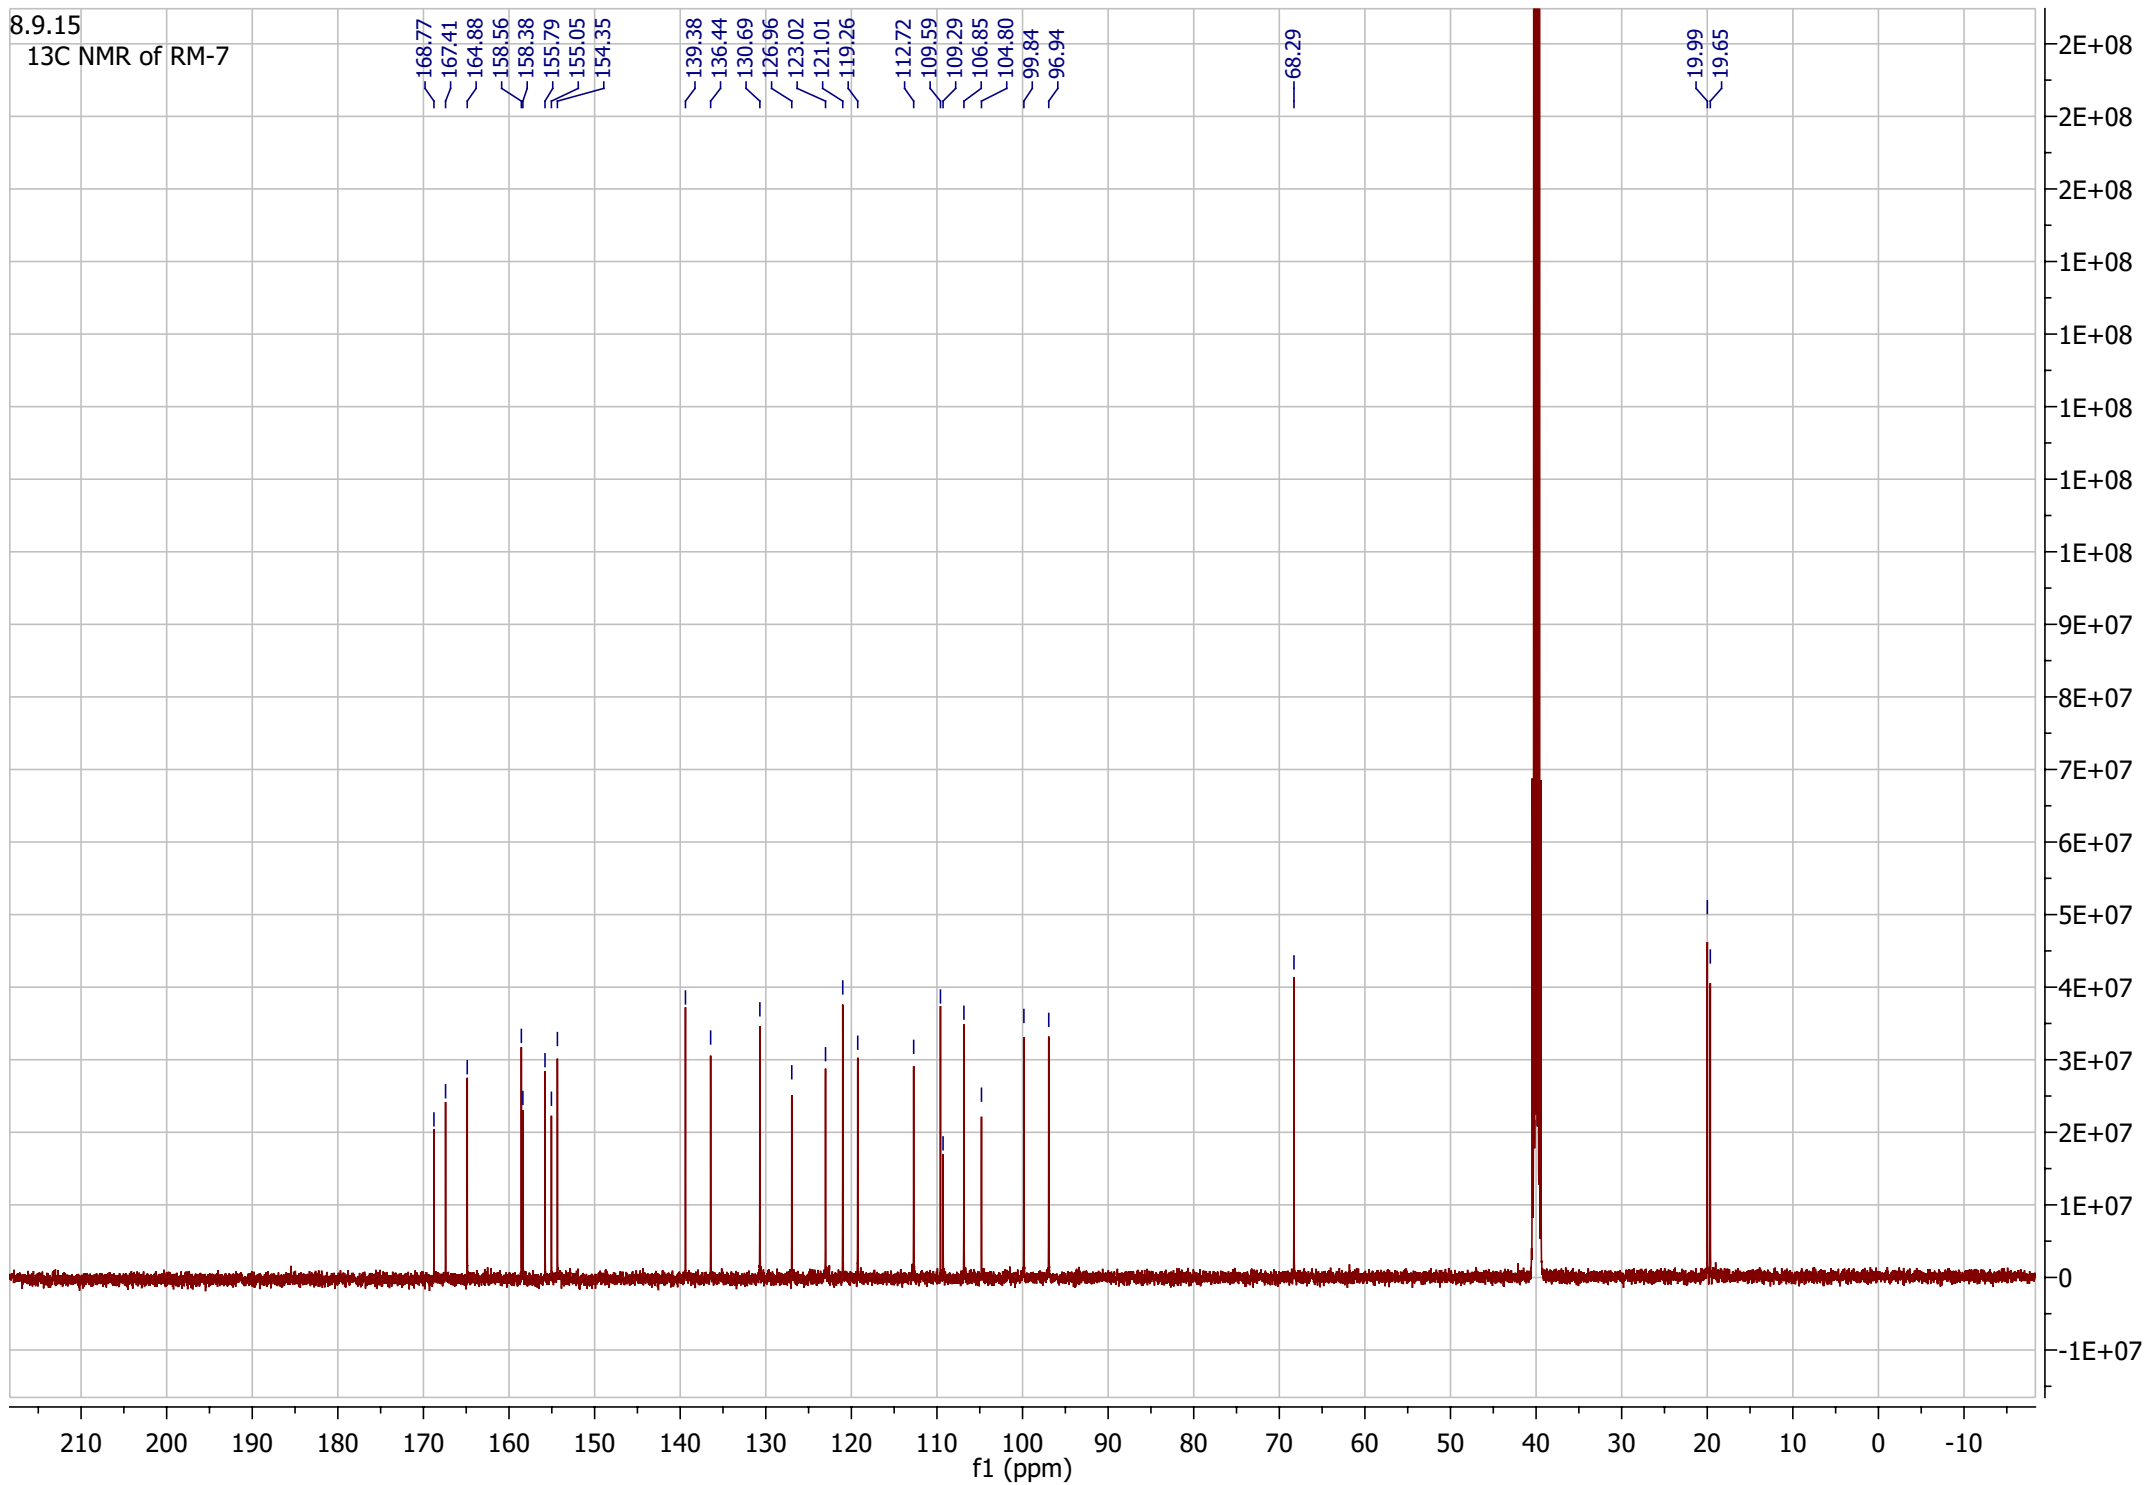

Compound 6

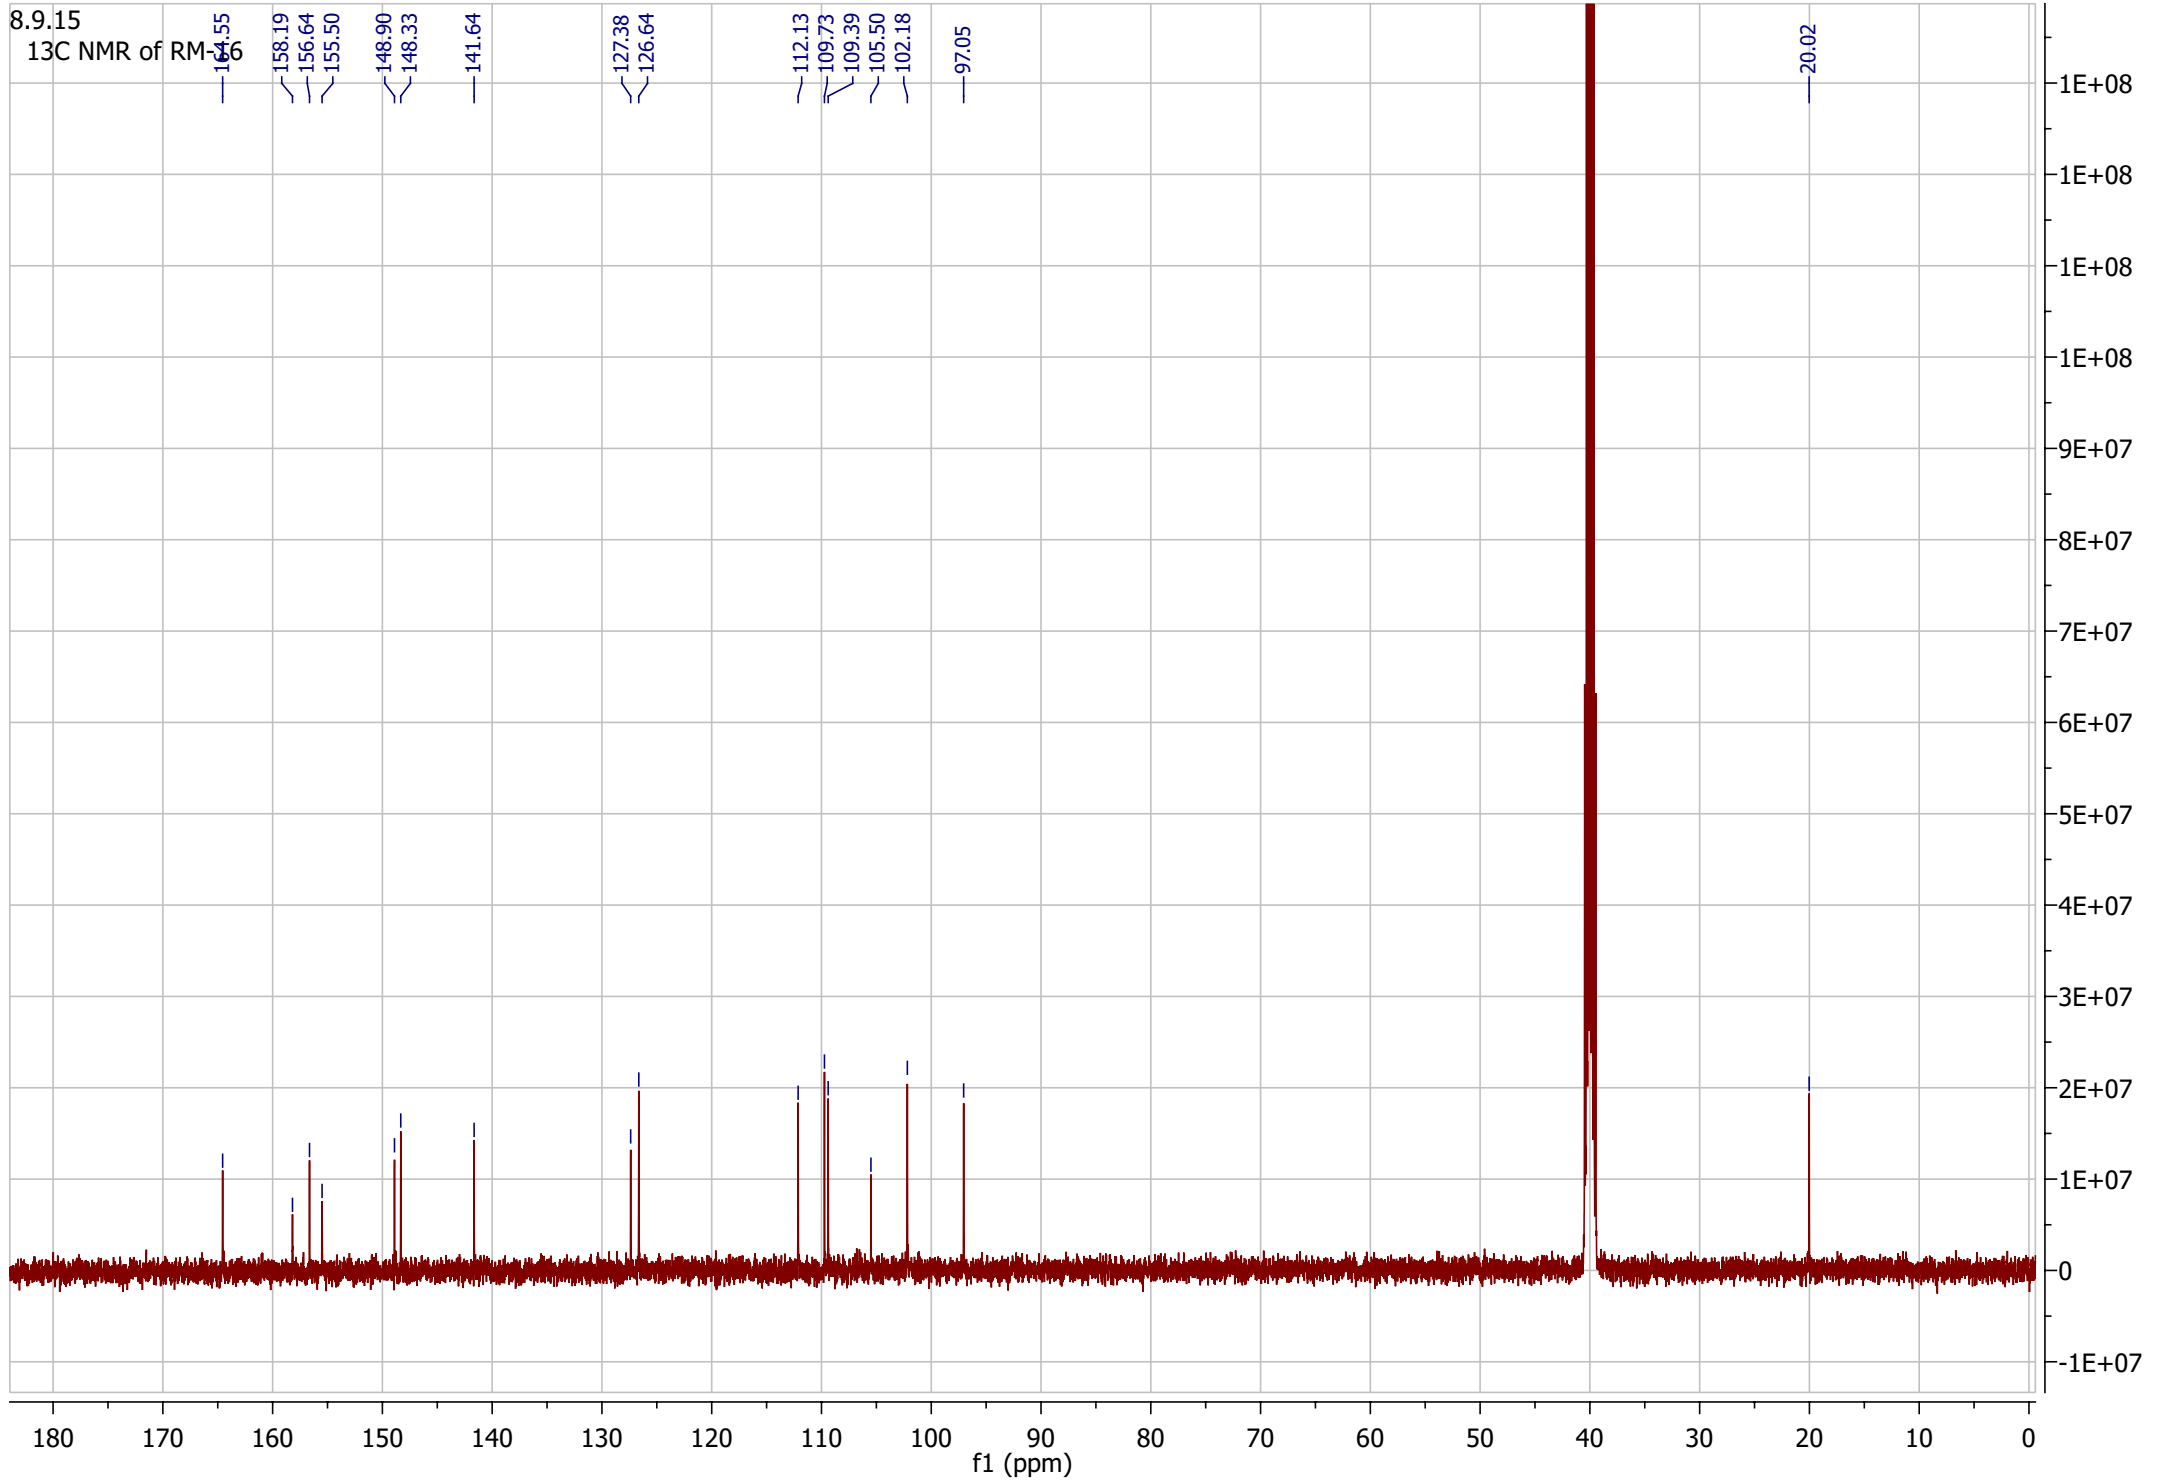



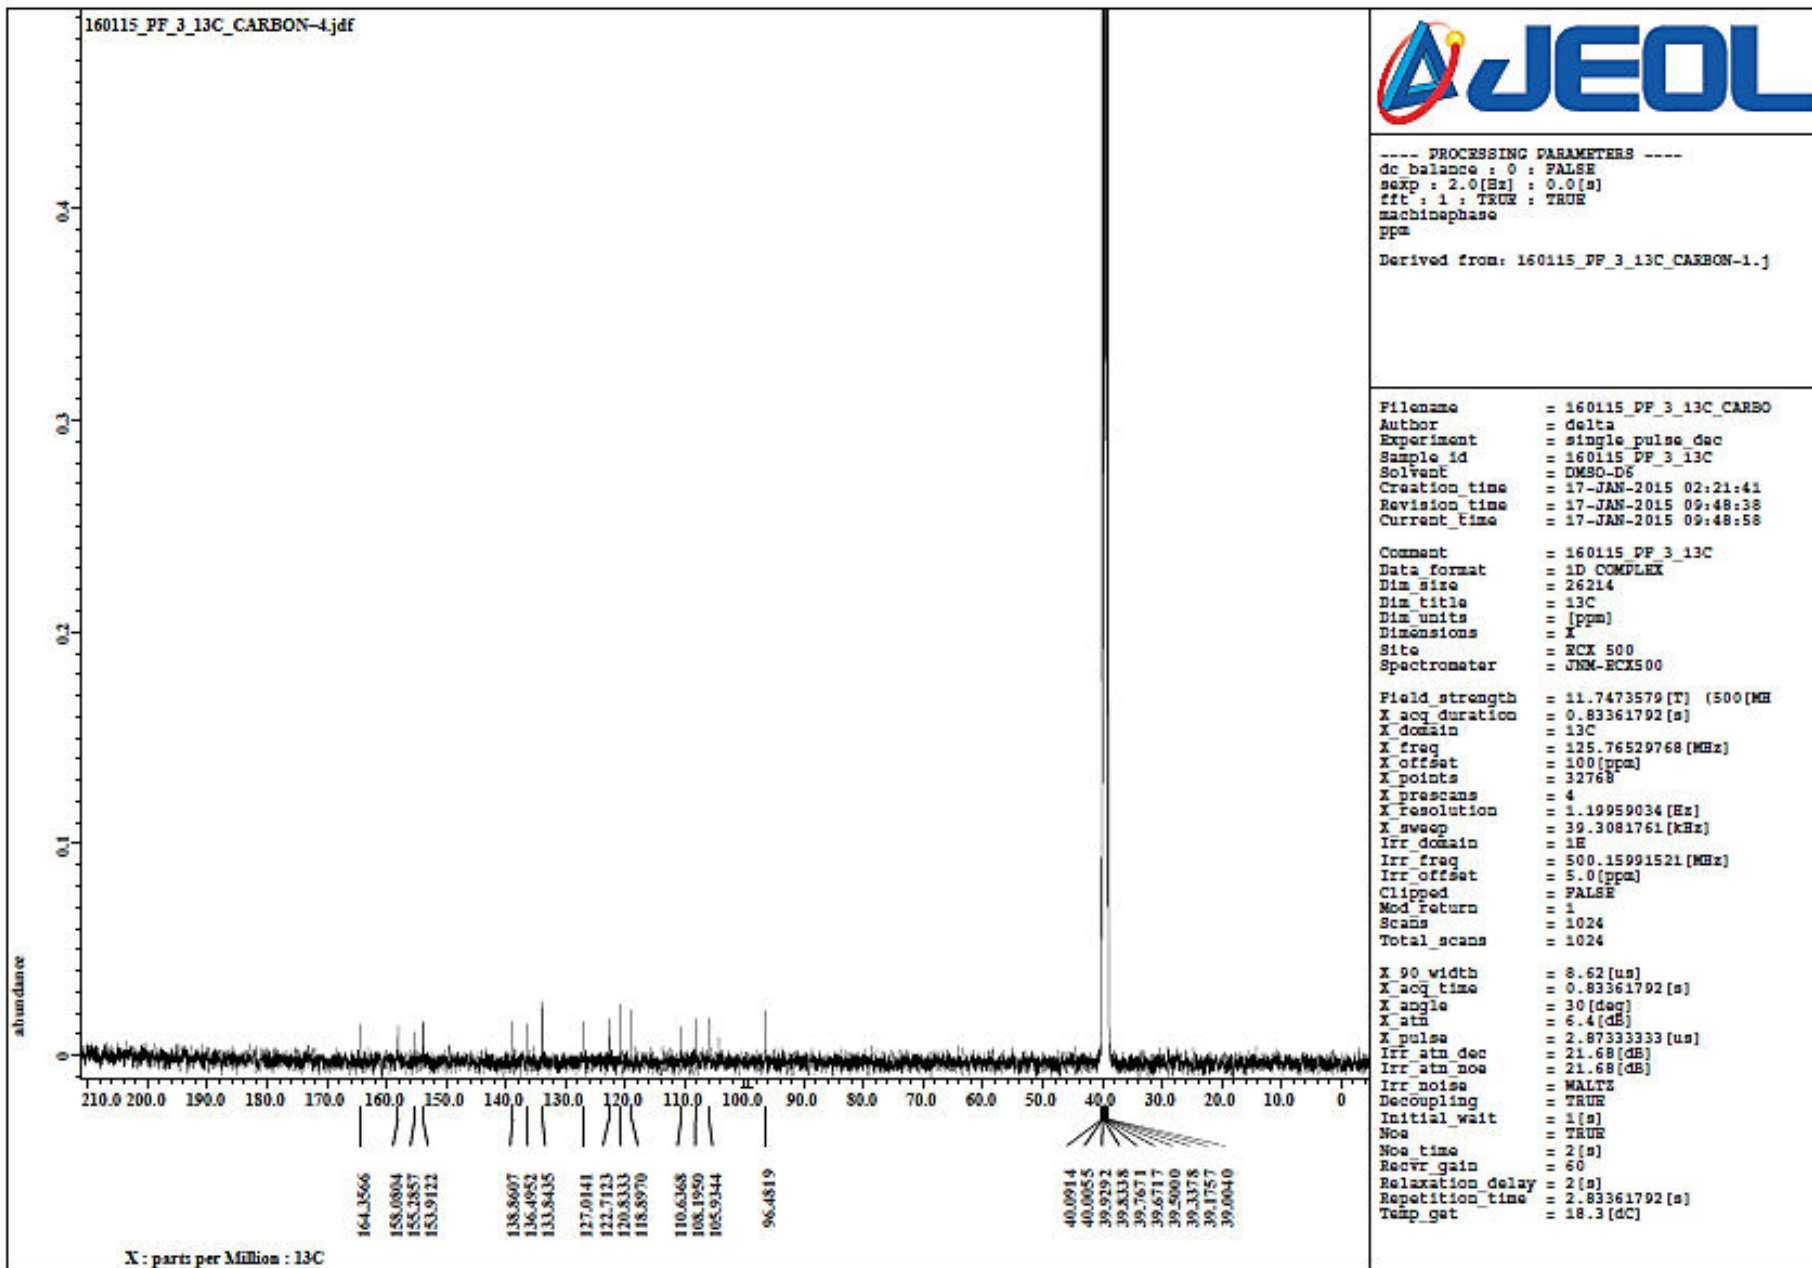

Compound 8

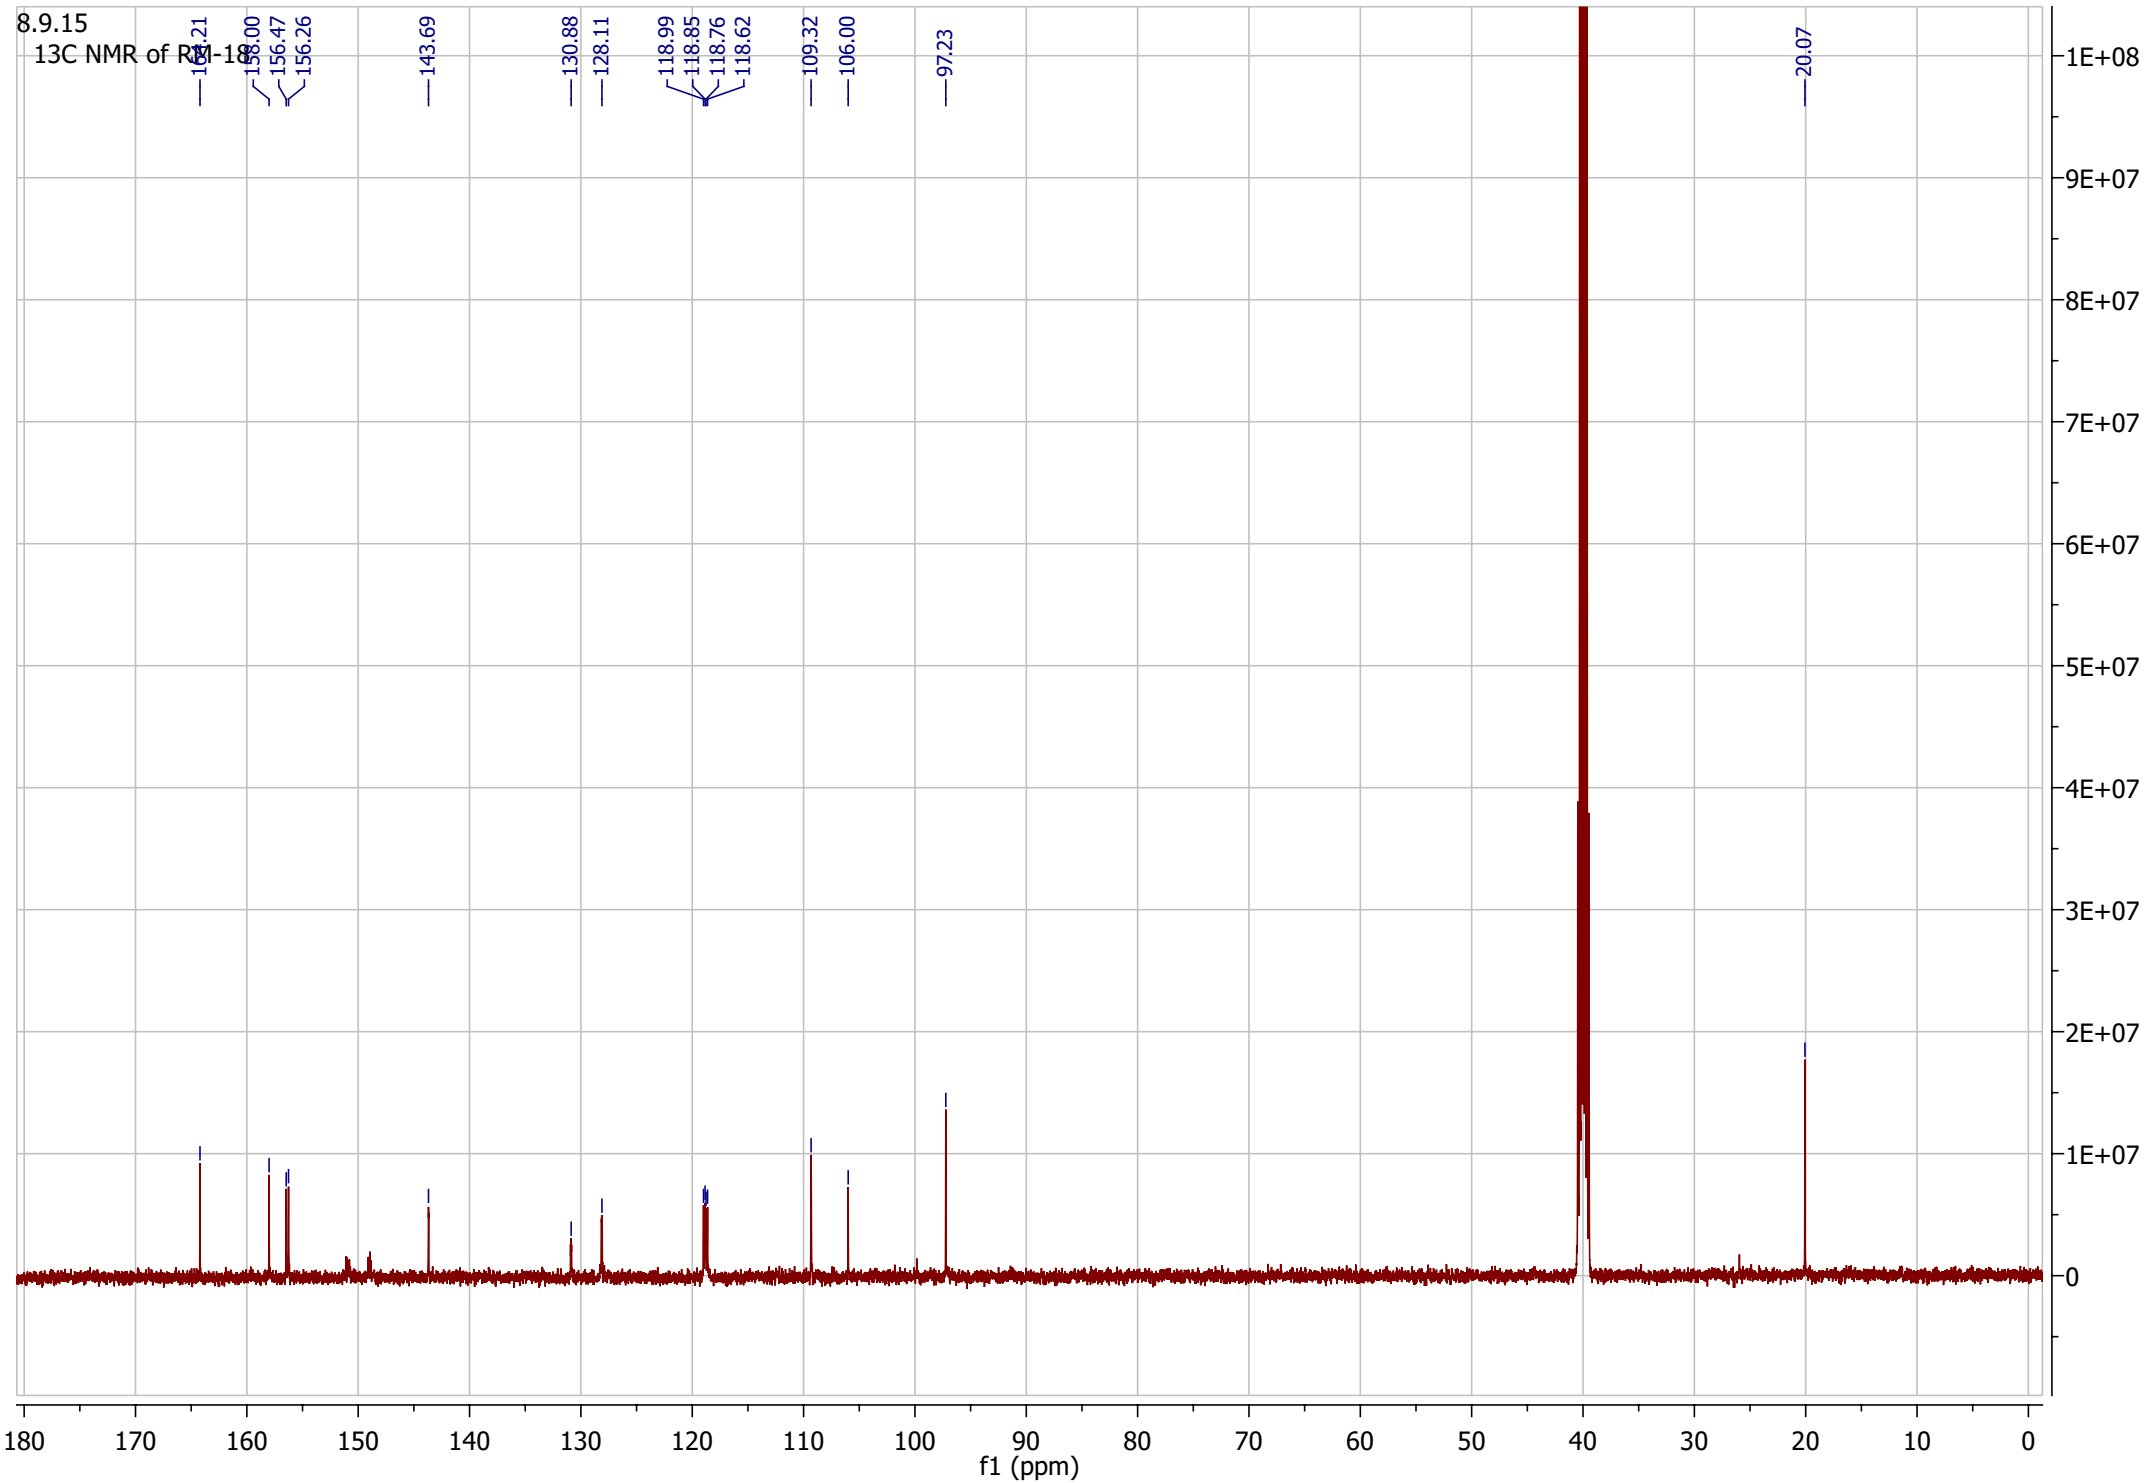

Compound 9

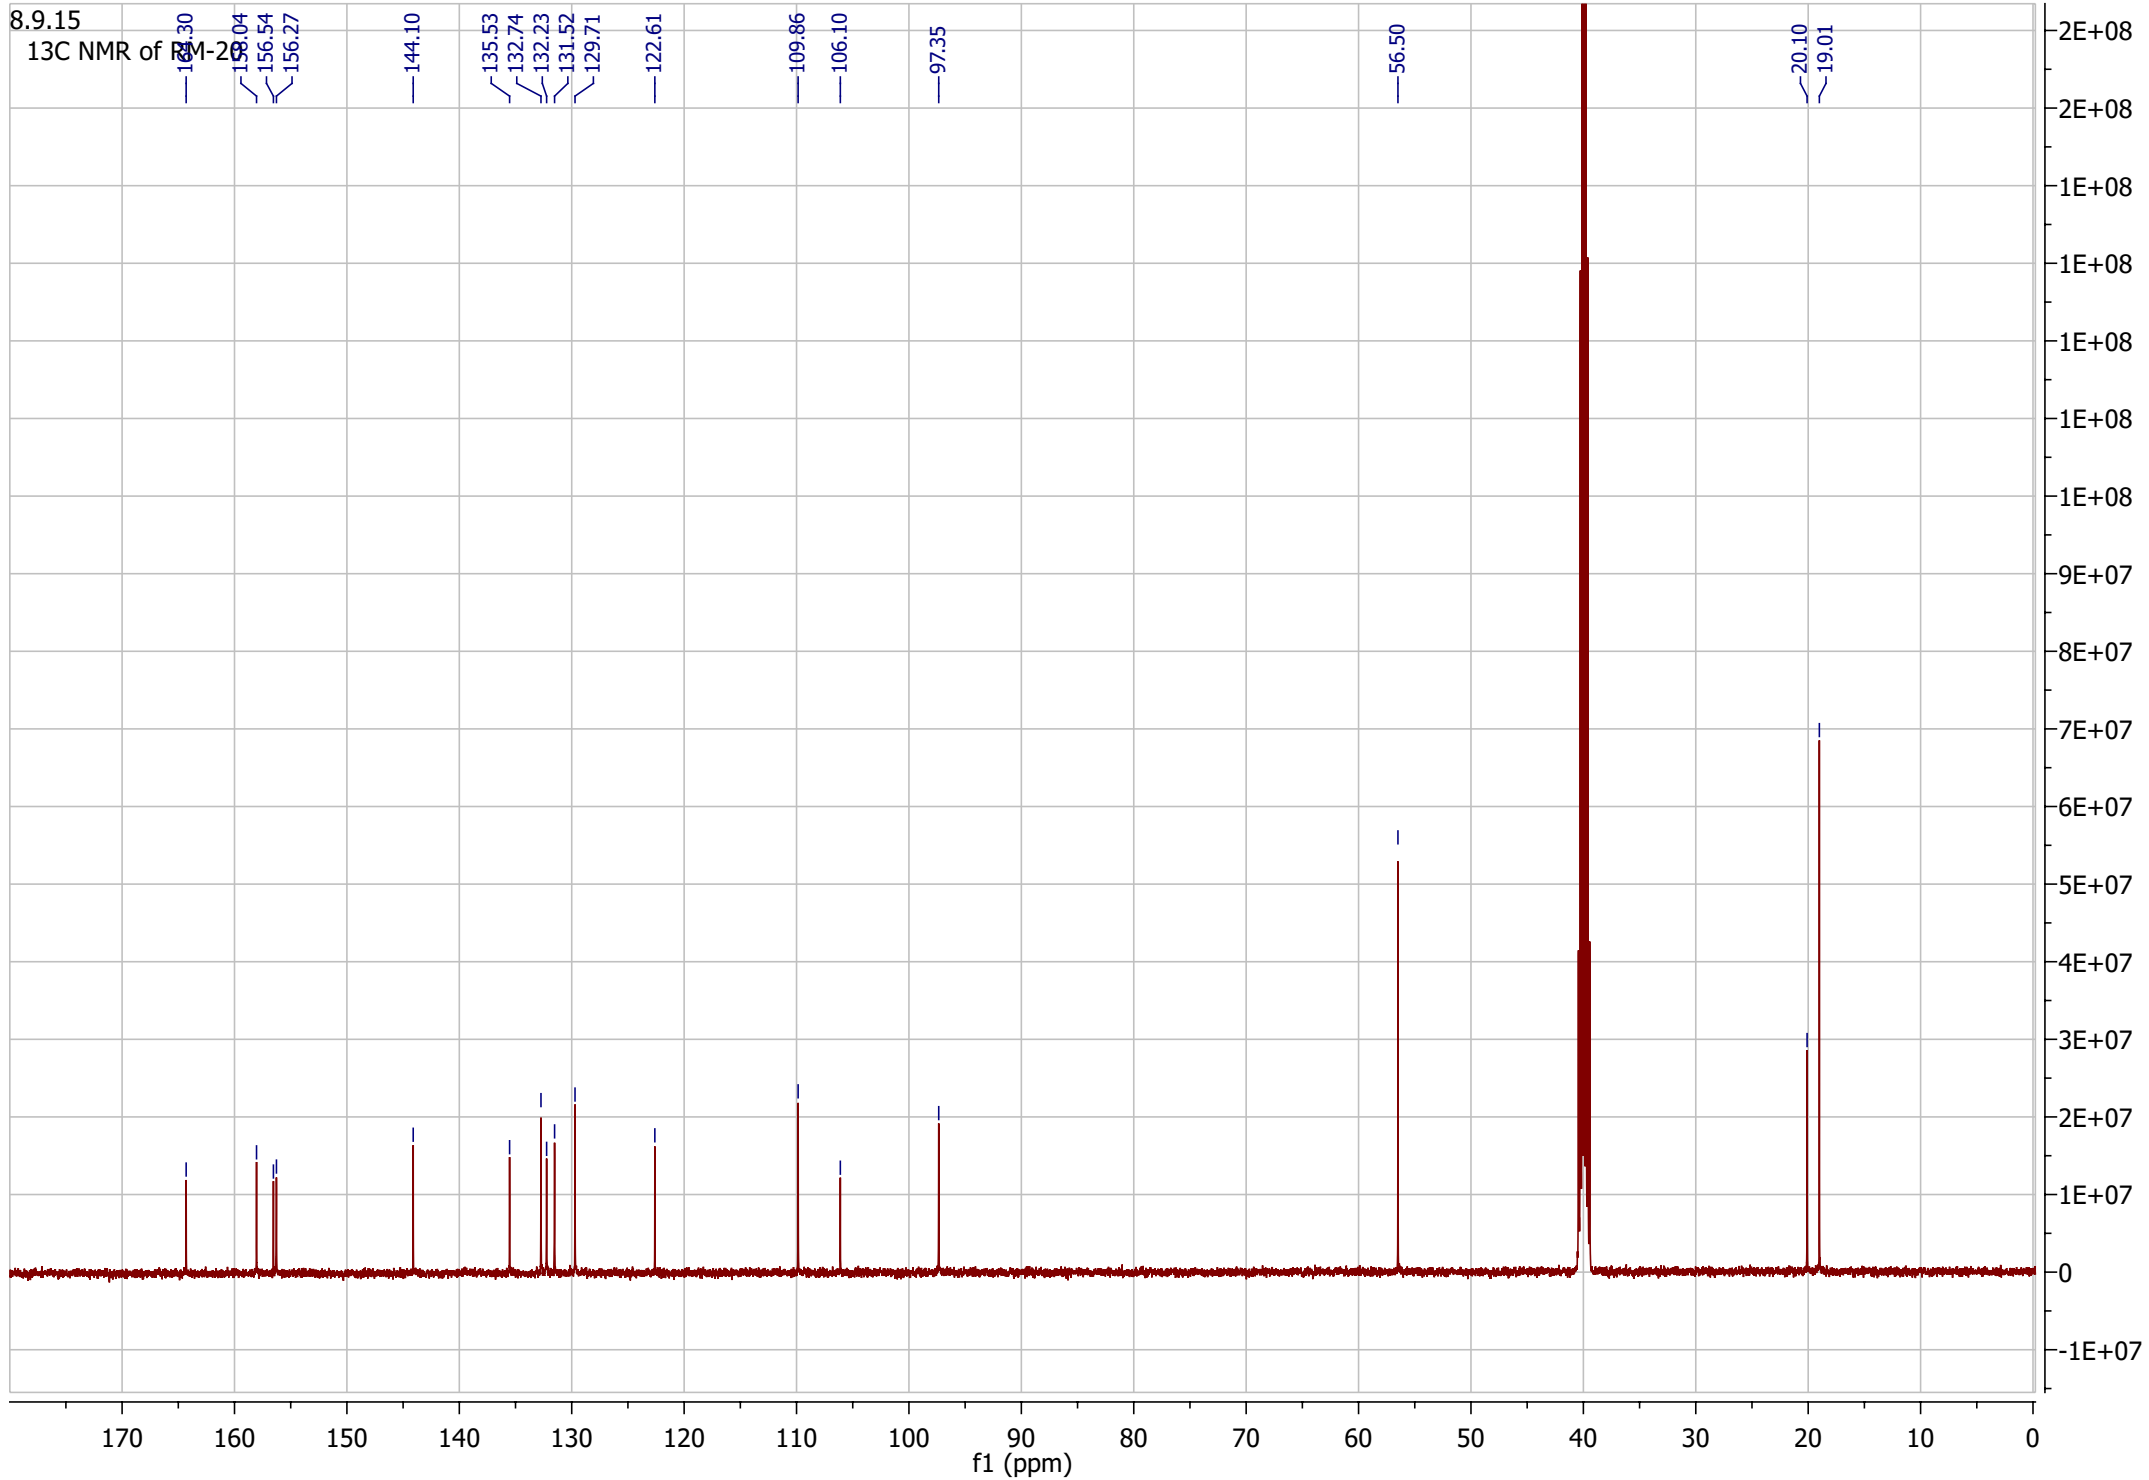

Compound 10

8.9.15

<sup>13</sup>C NMR of RM-21

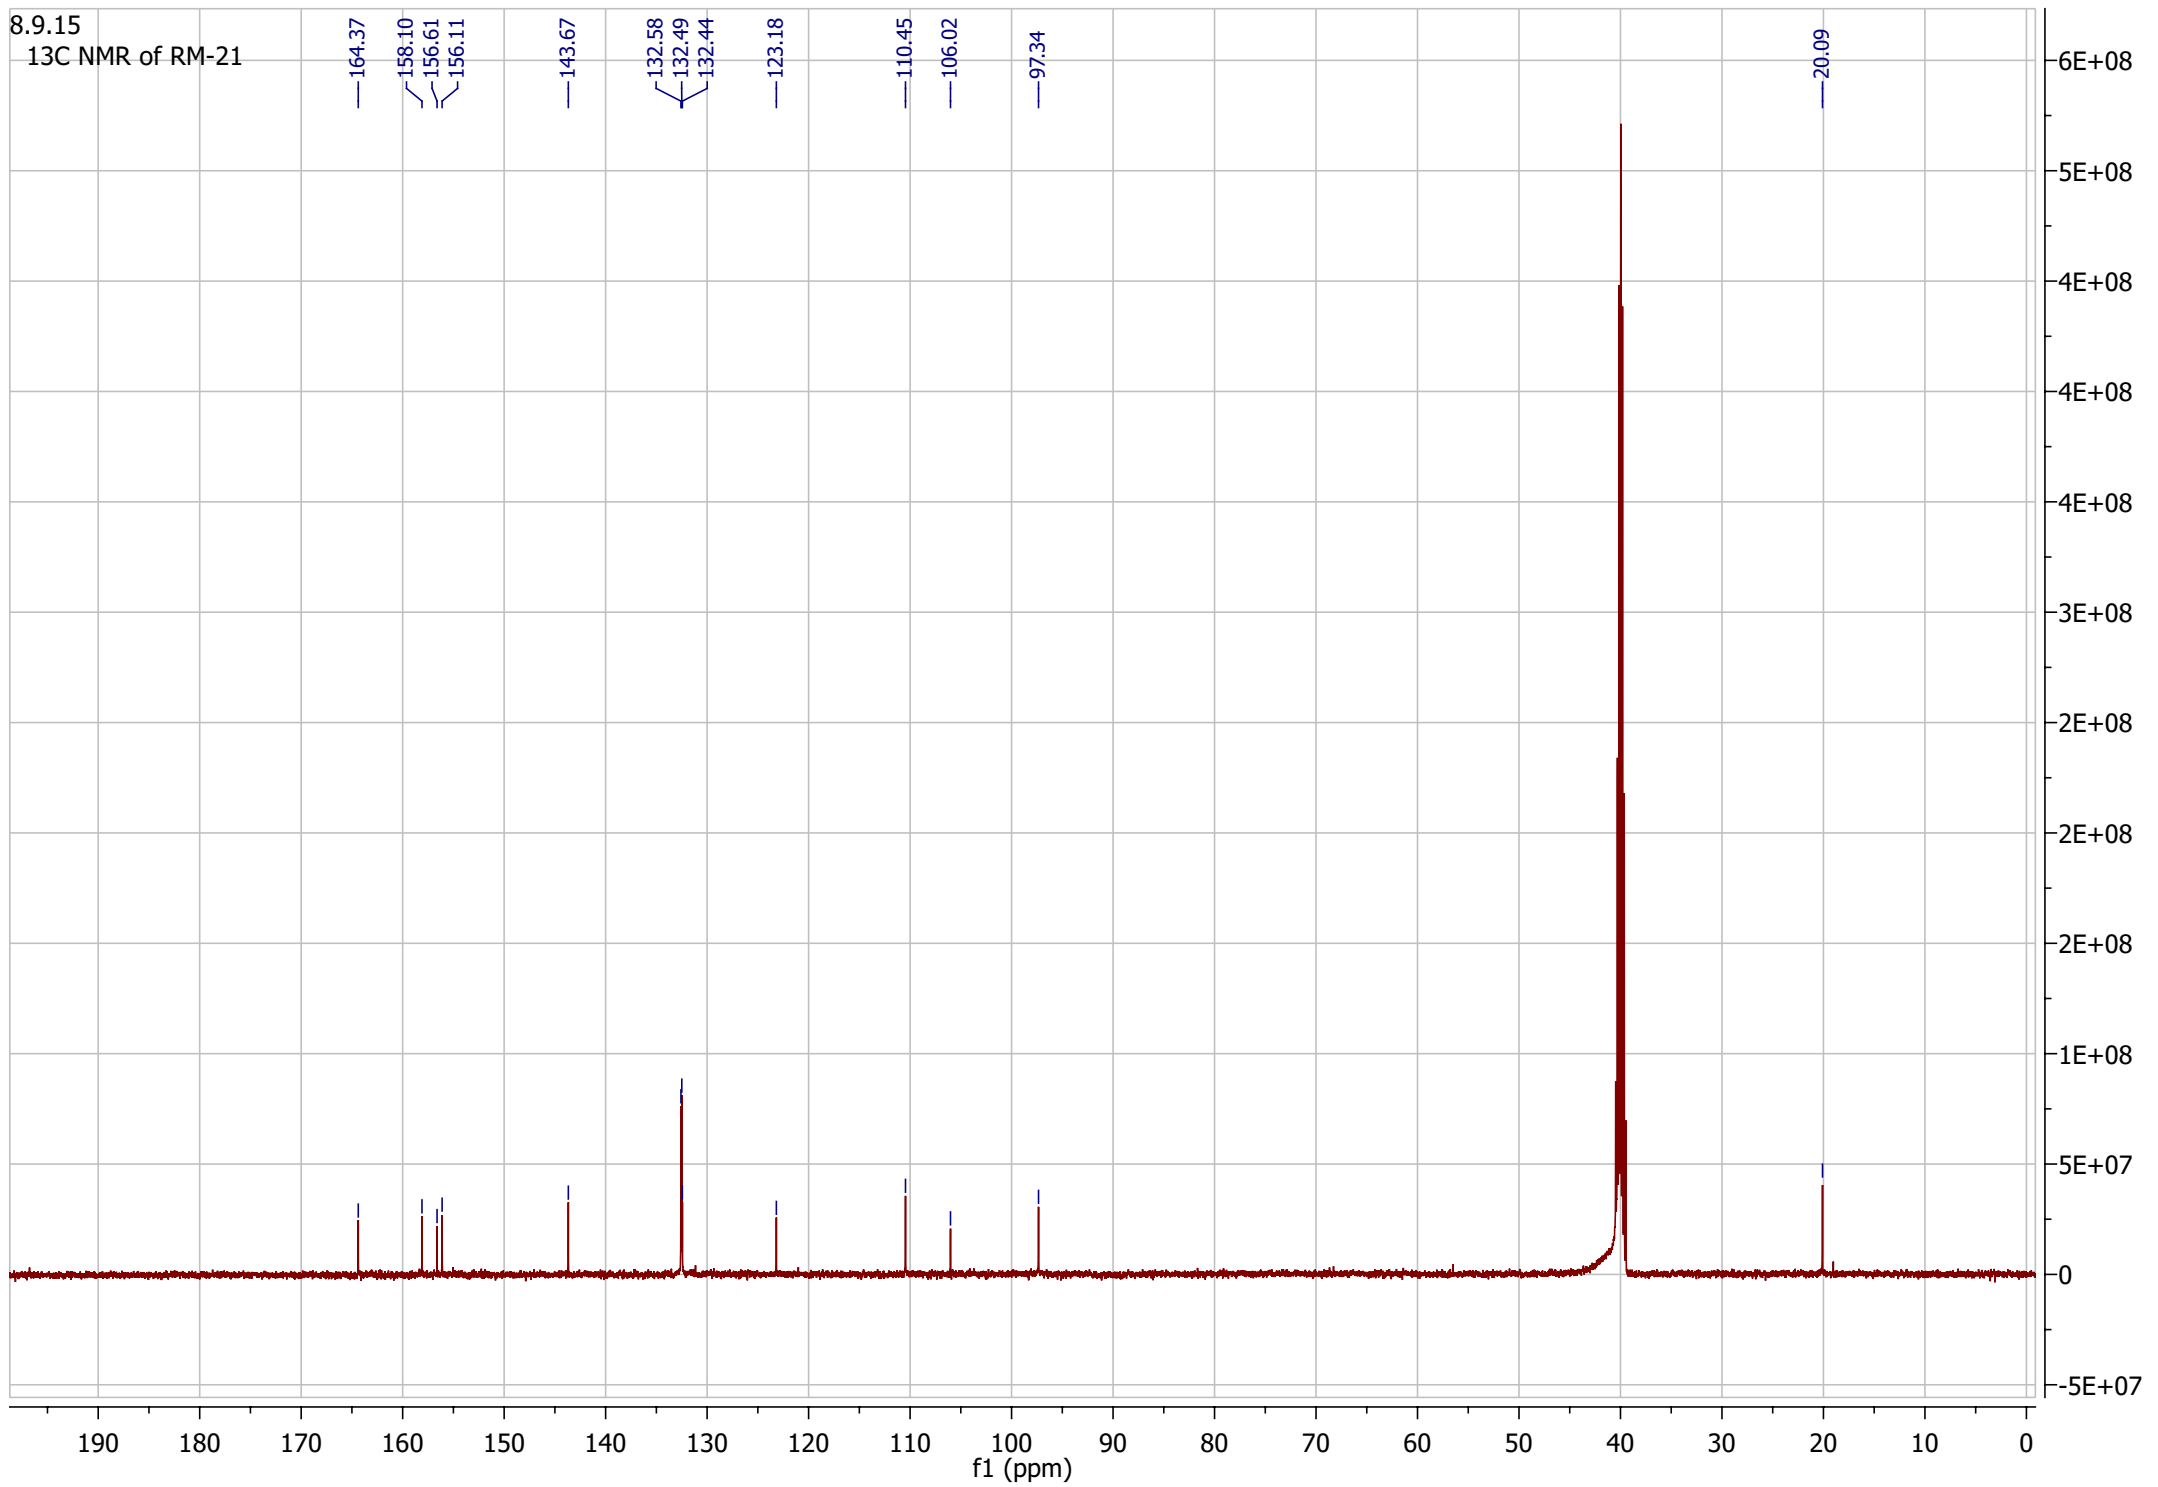

Compound 11

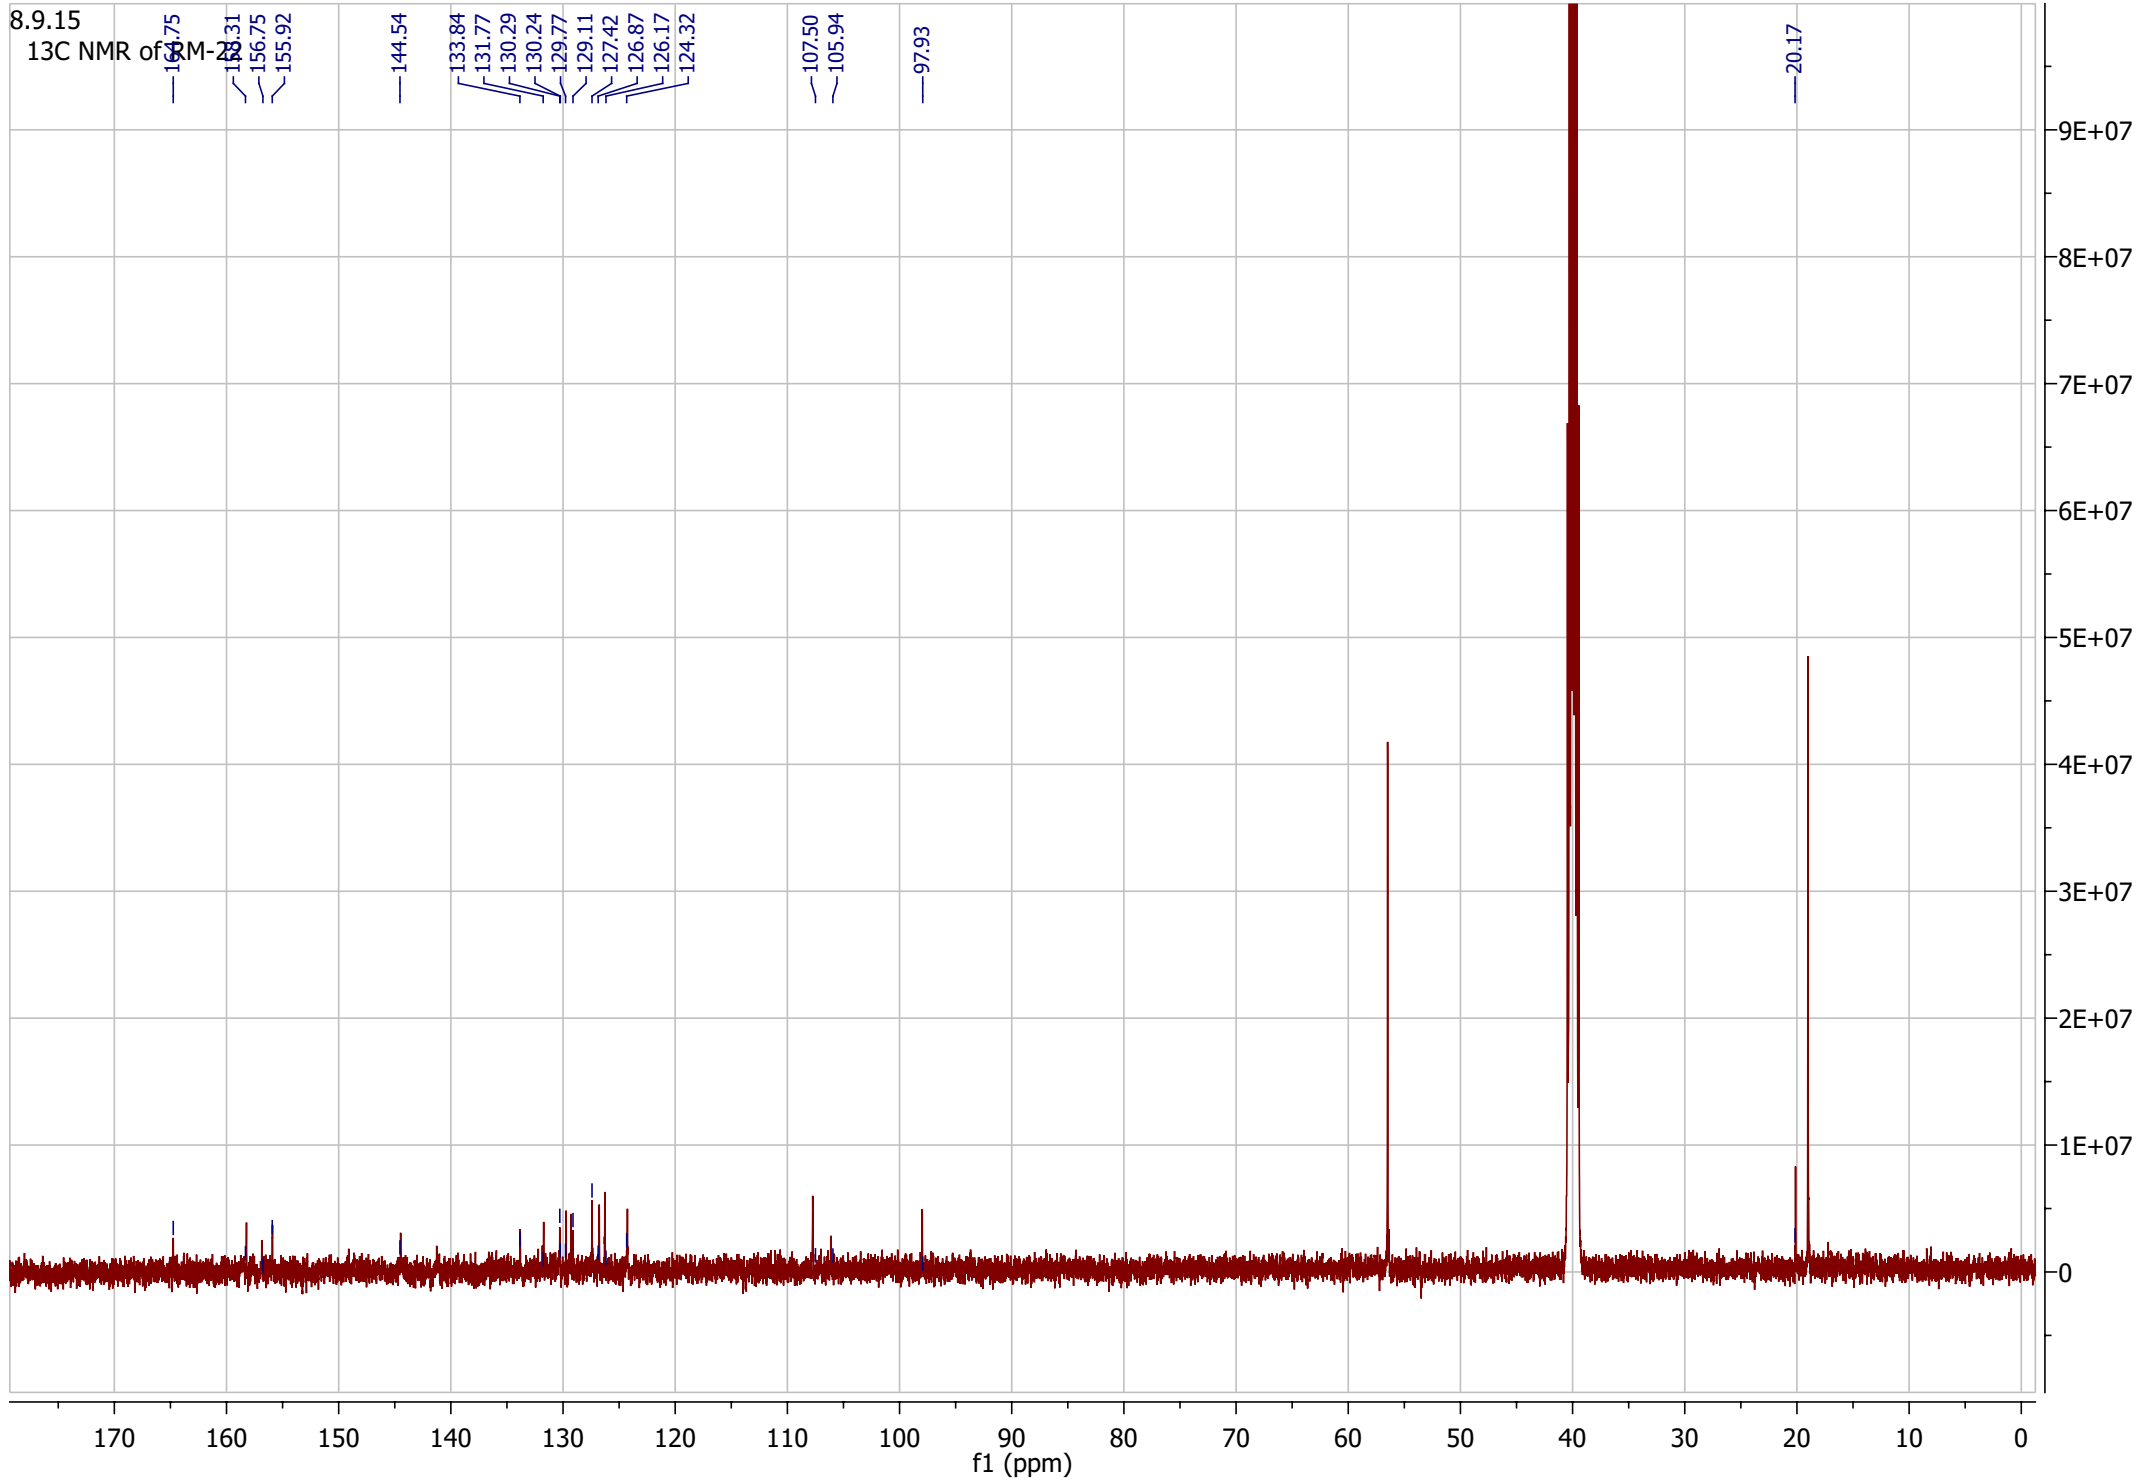

Compound 13

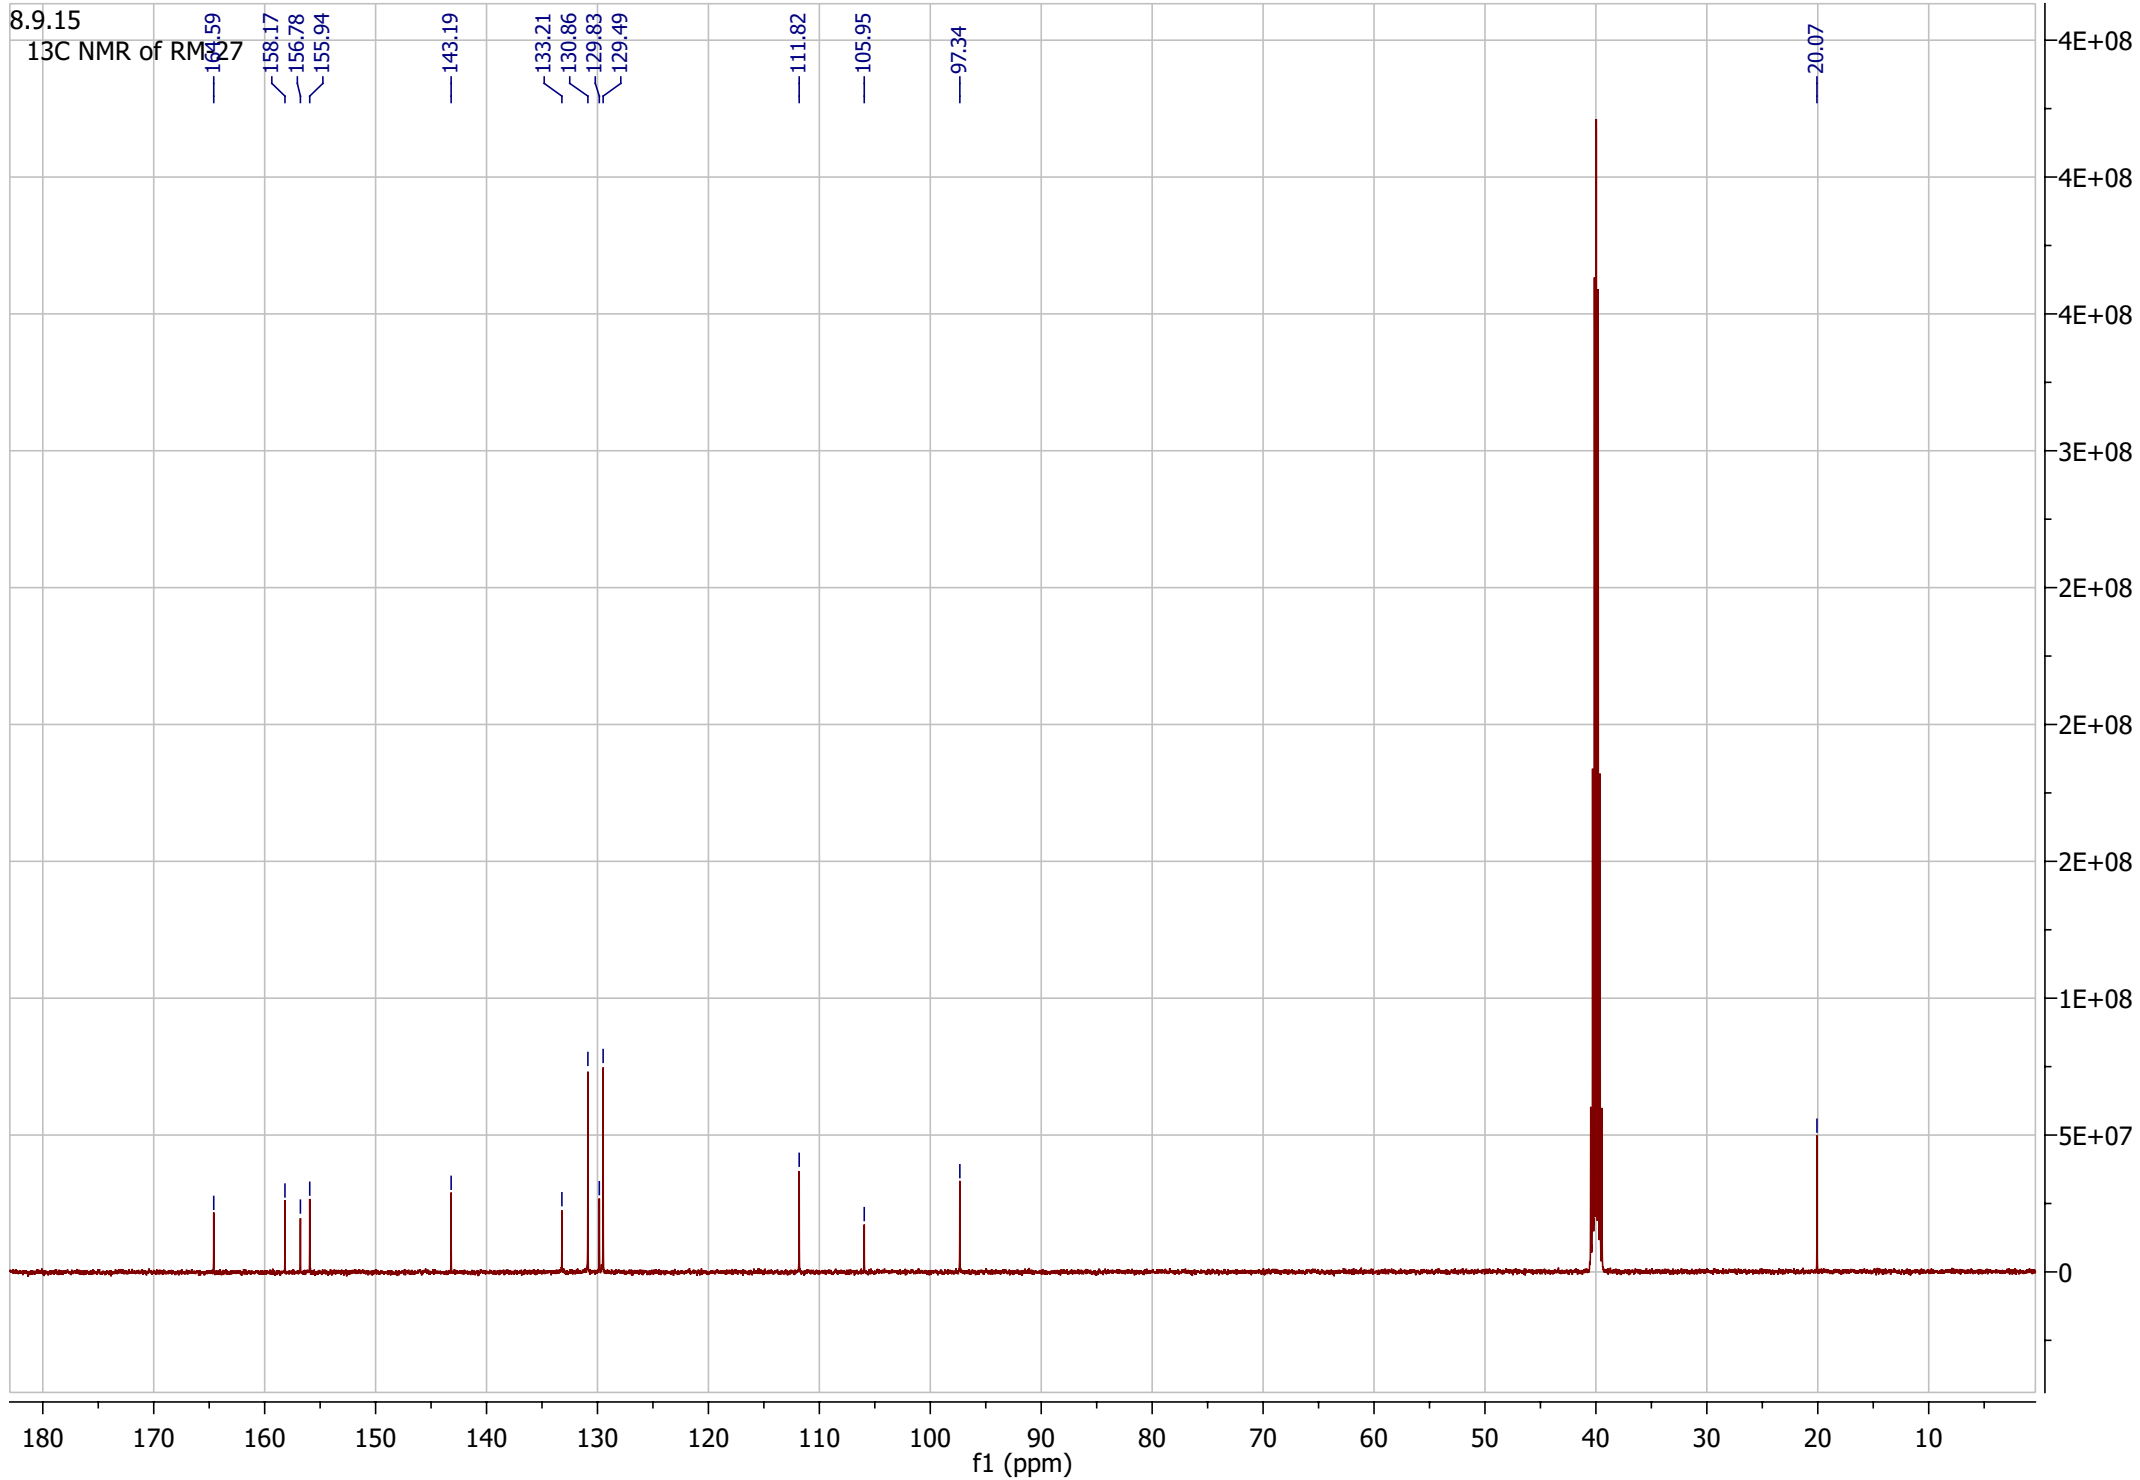

Compound 14

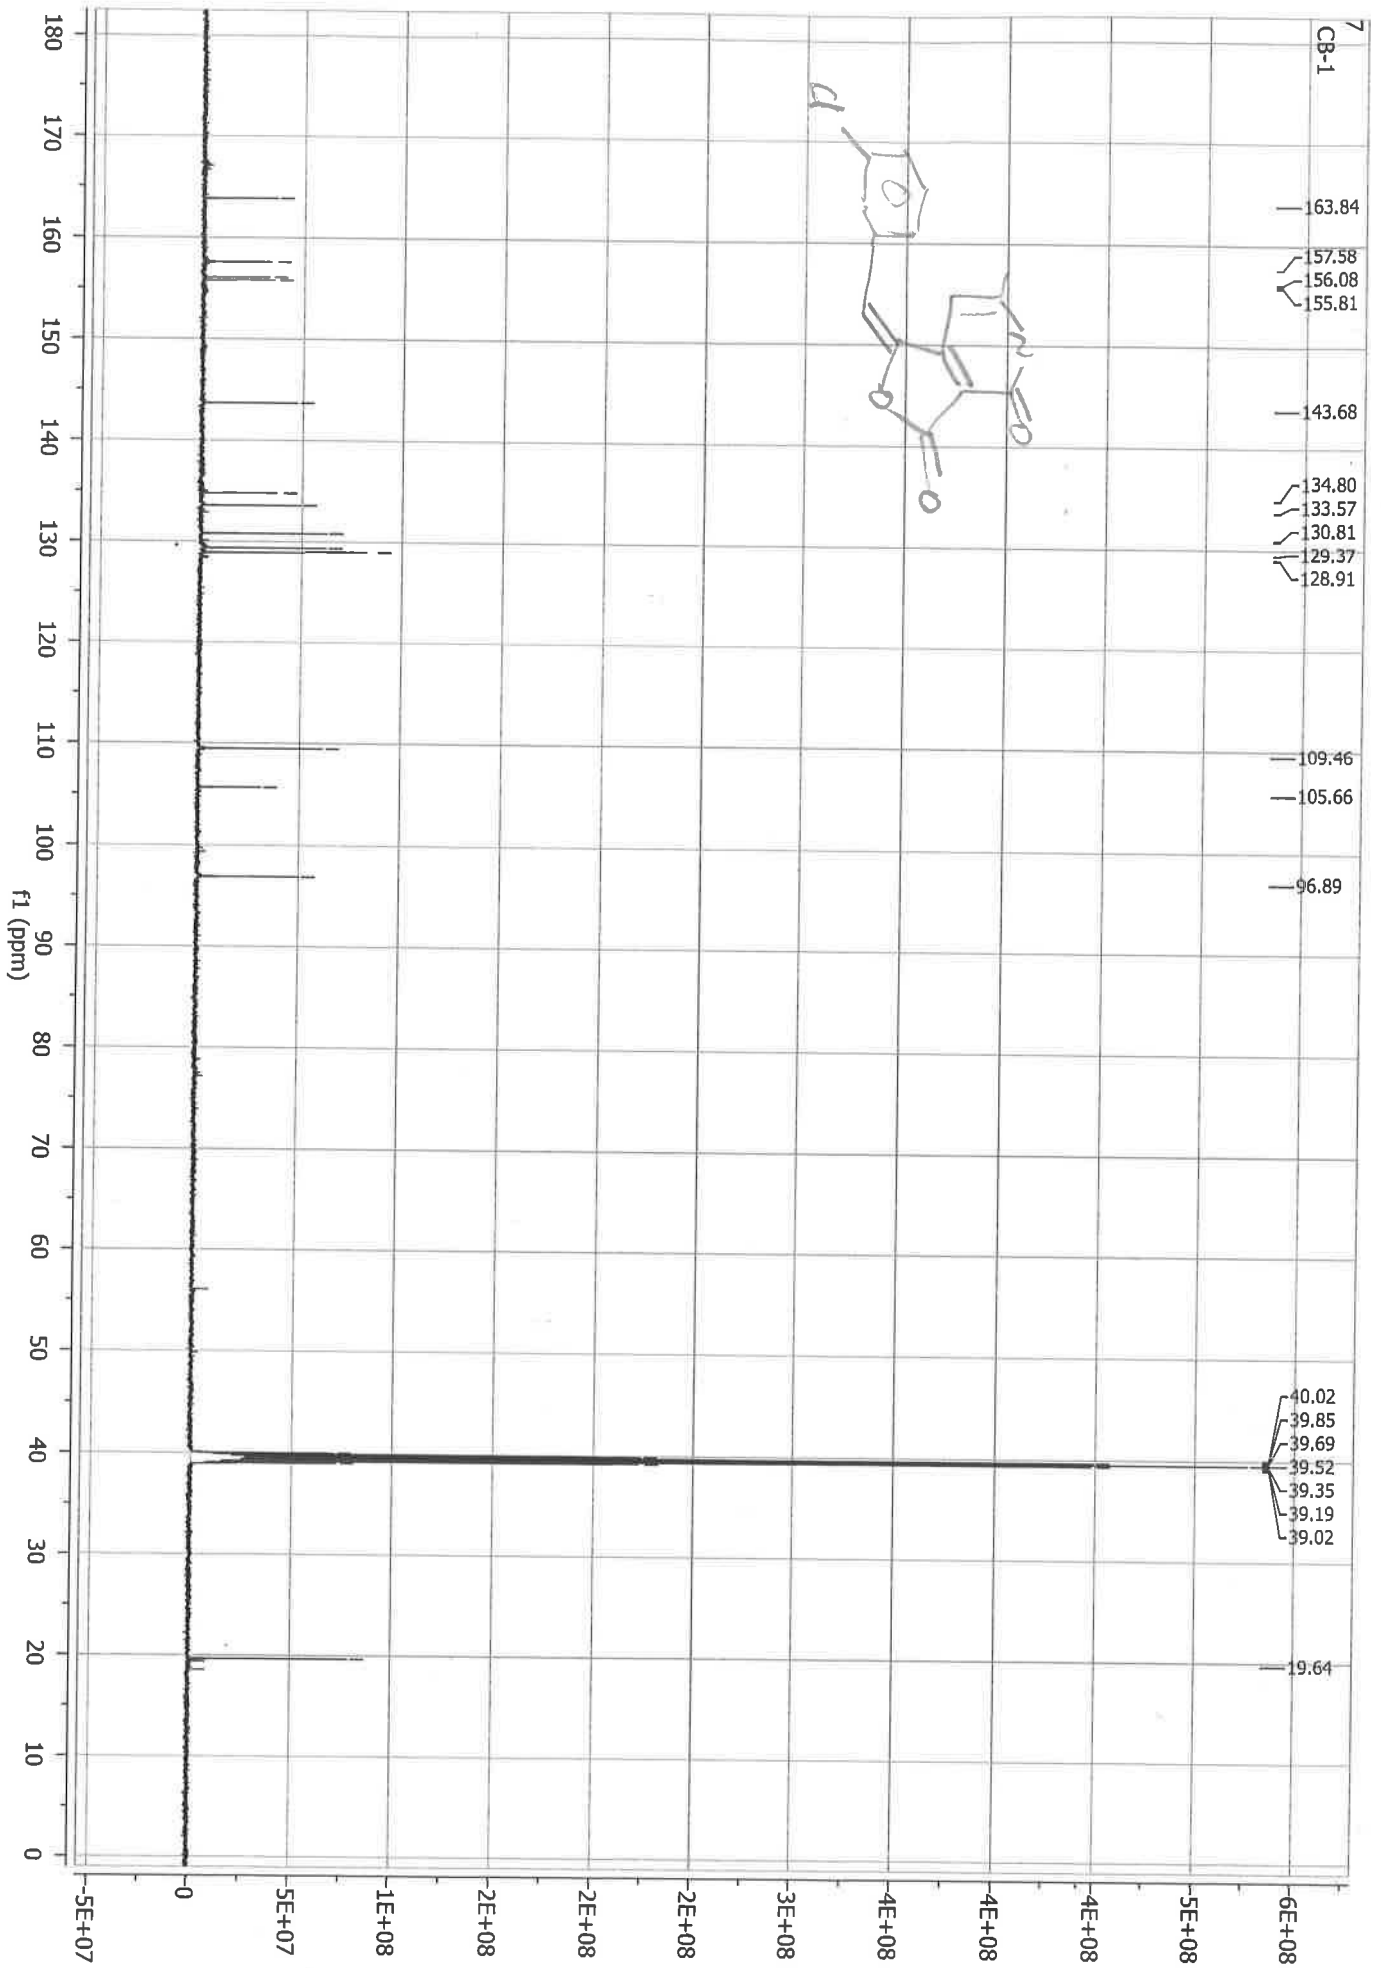

Compound 15

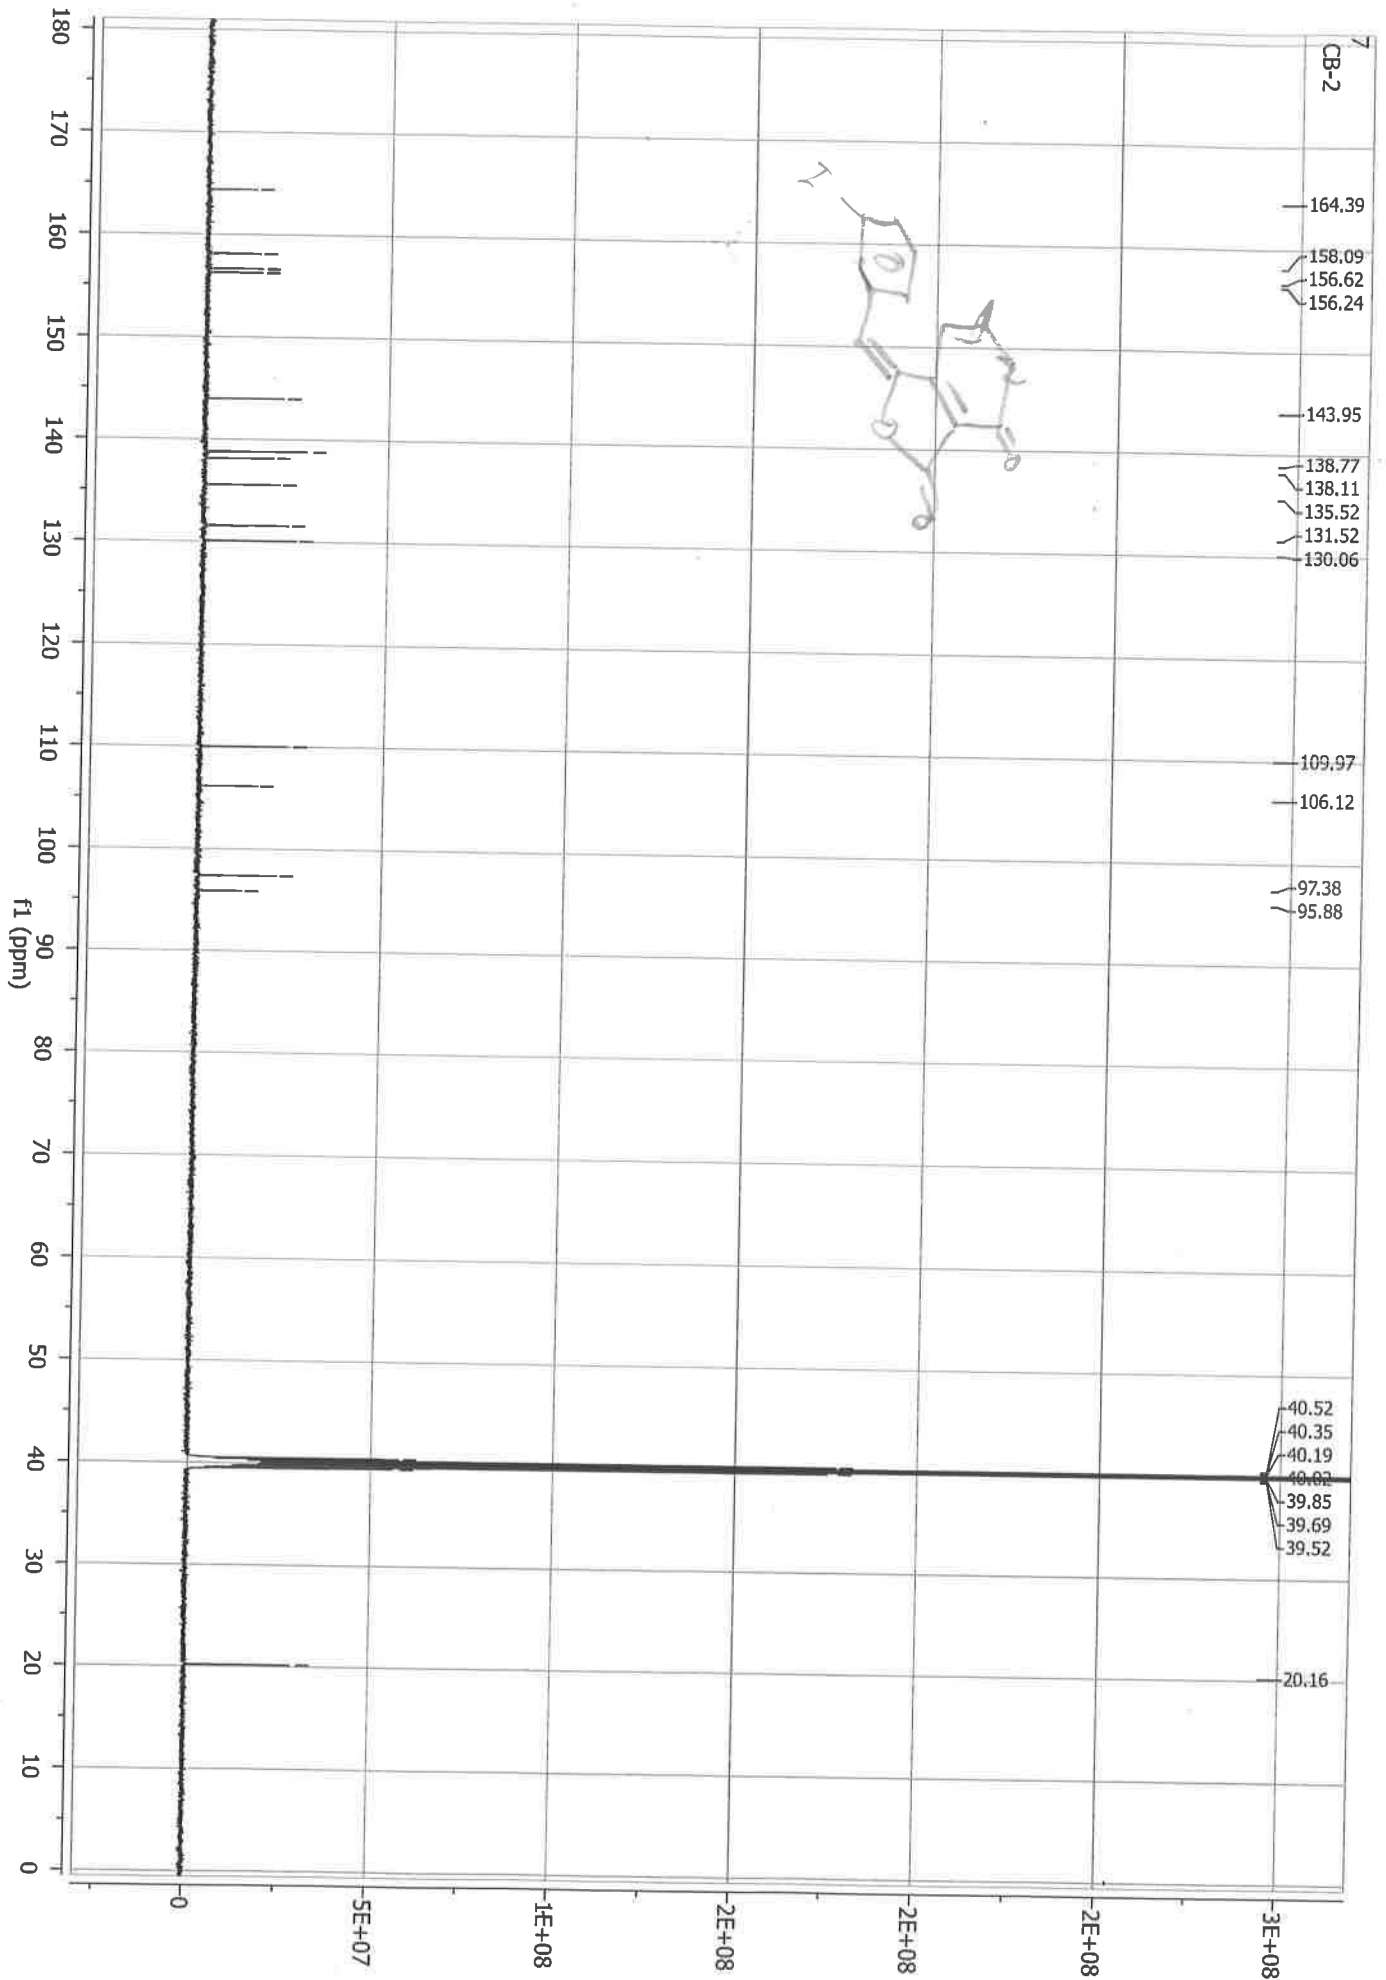



Compound 17

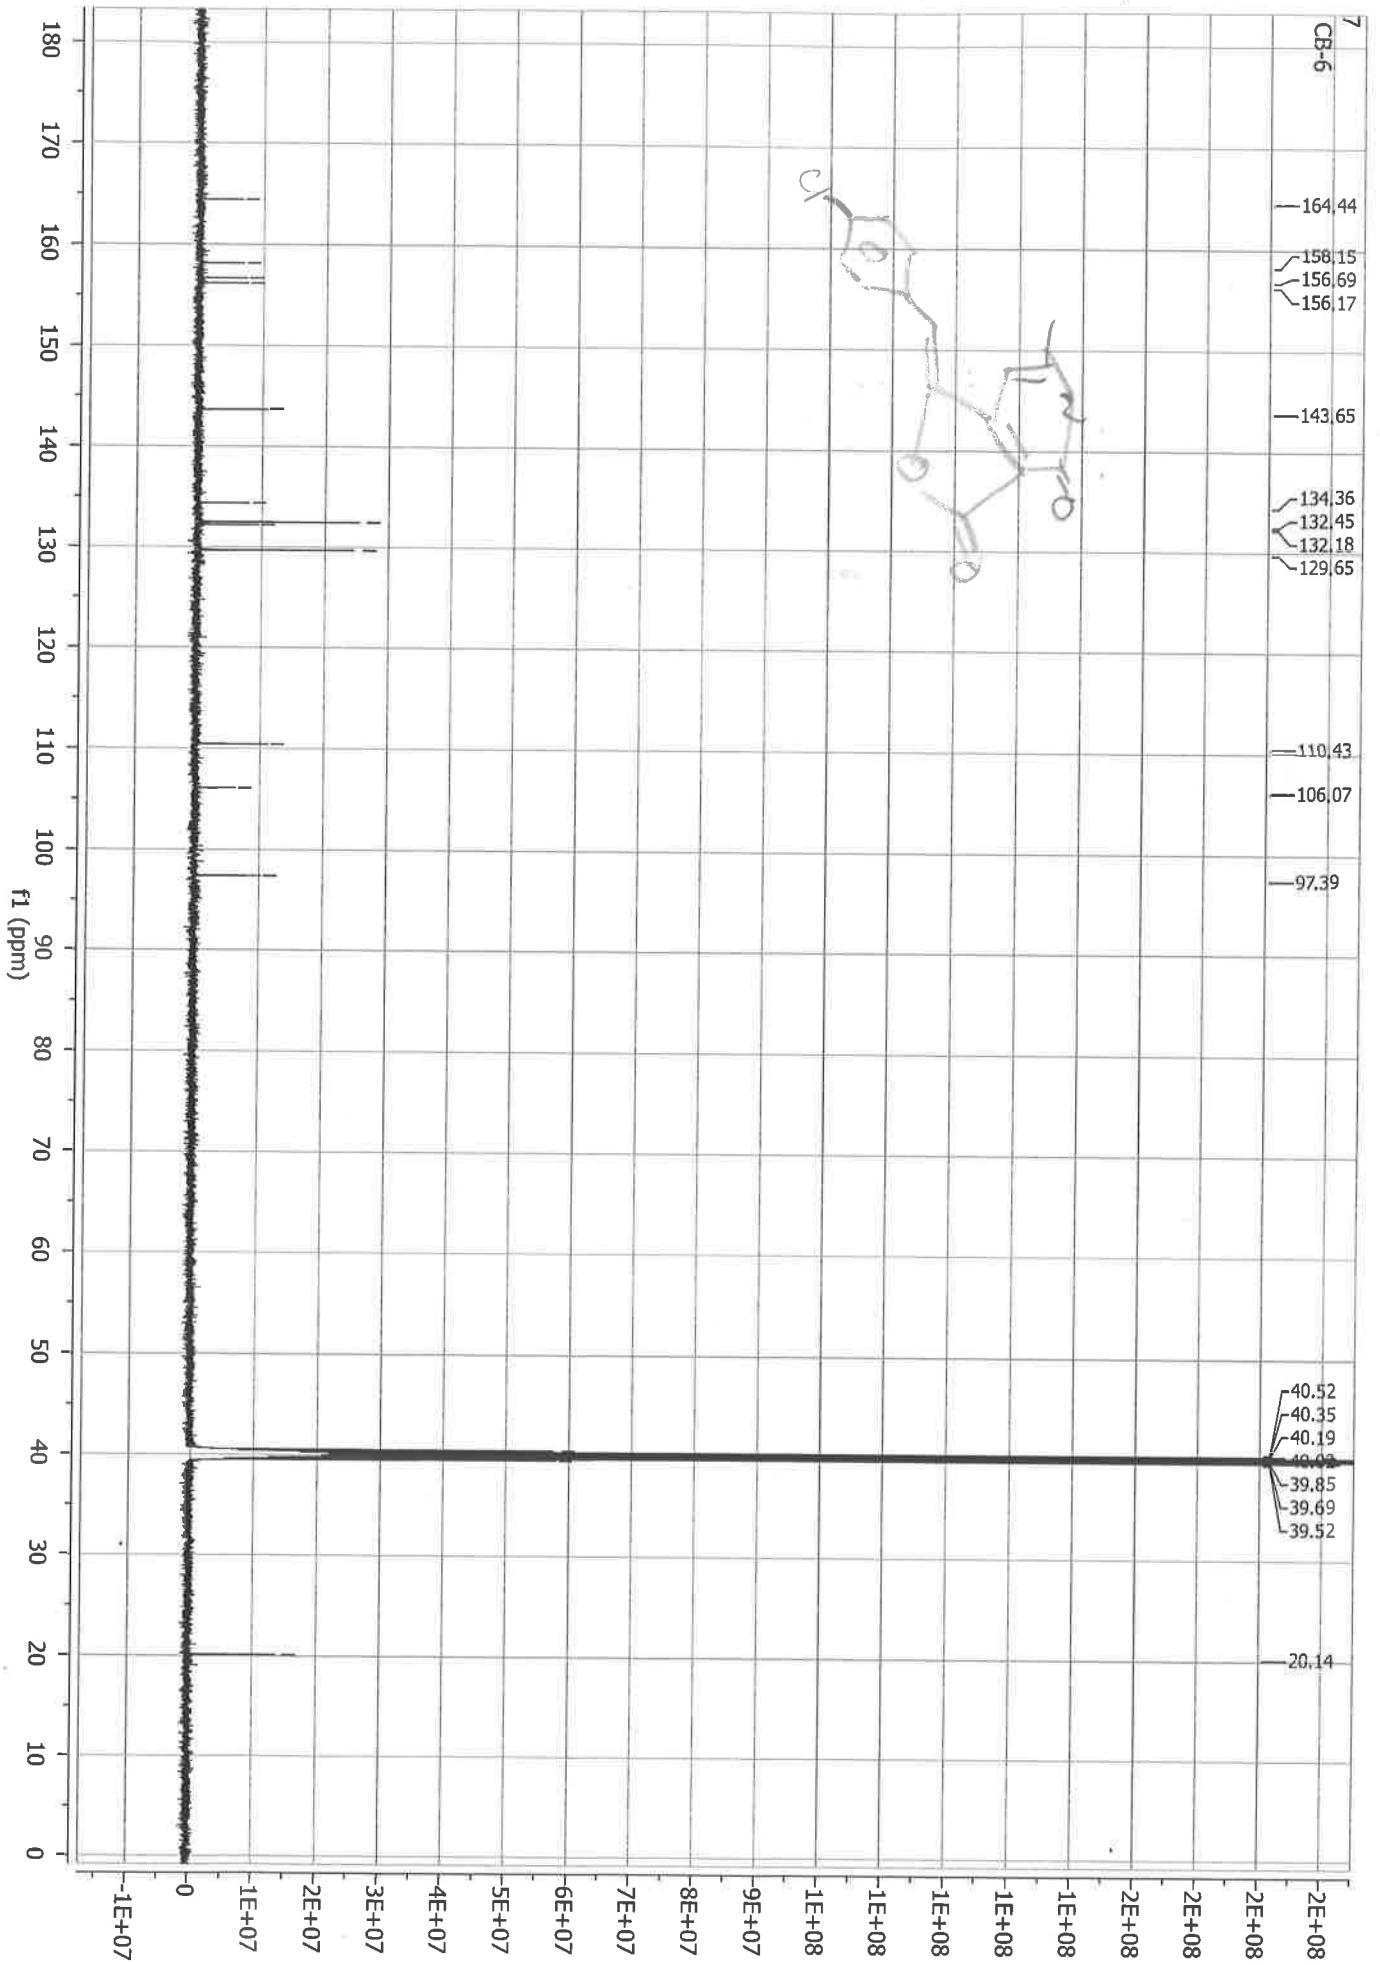

Compound 18

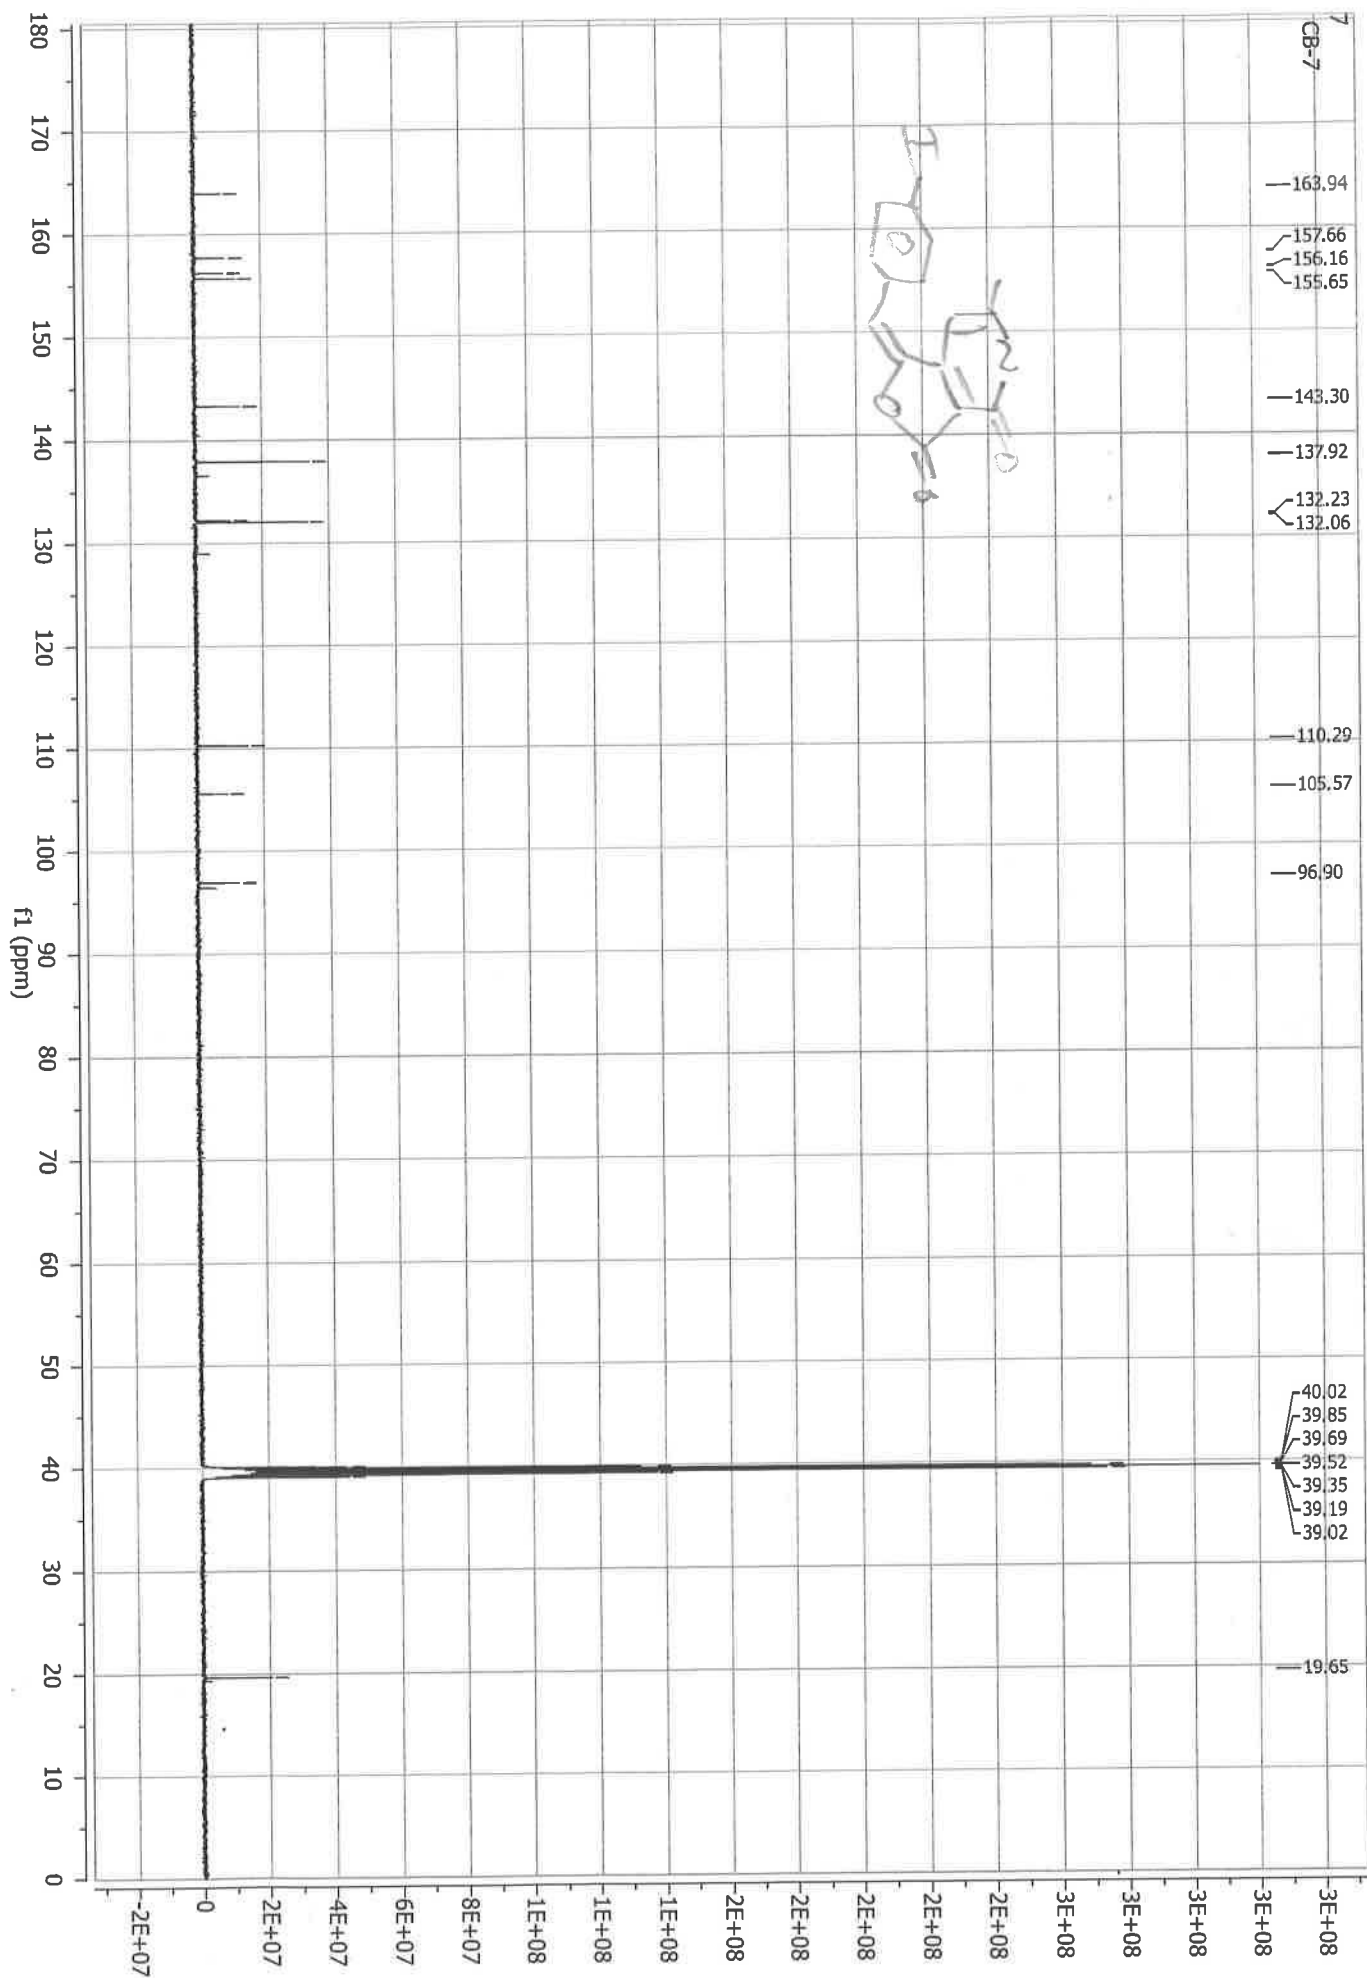

Compound 19

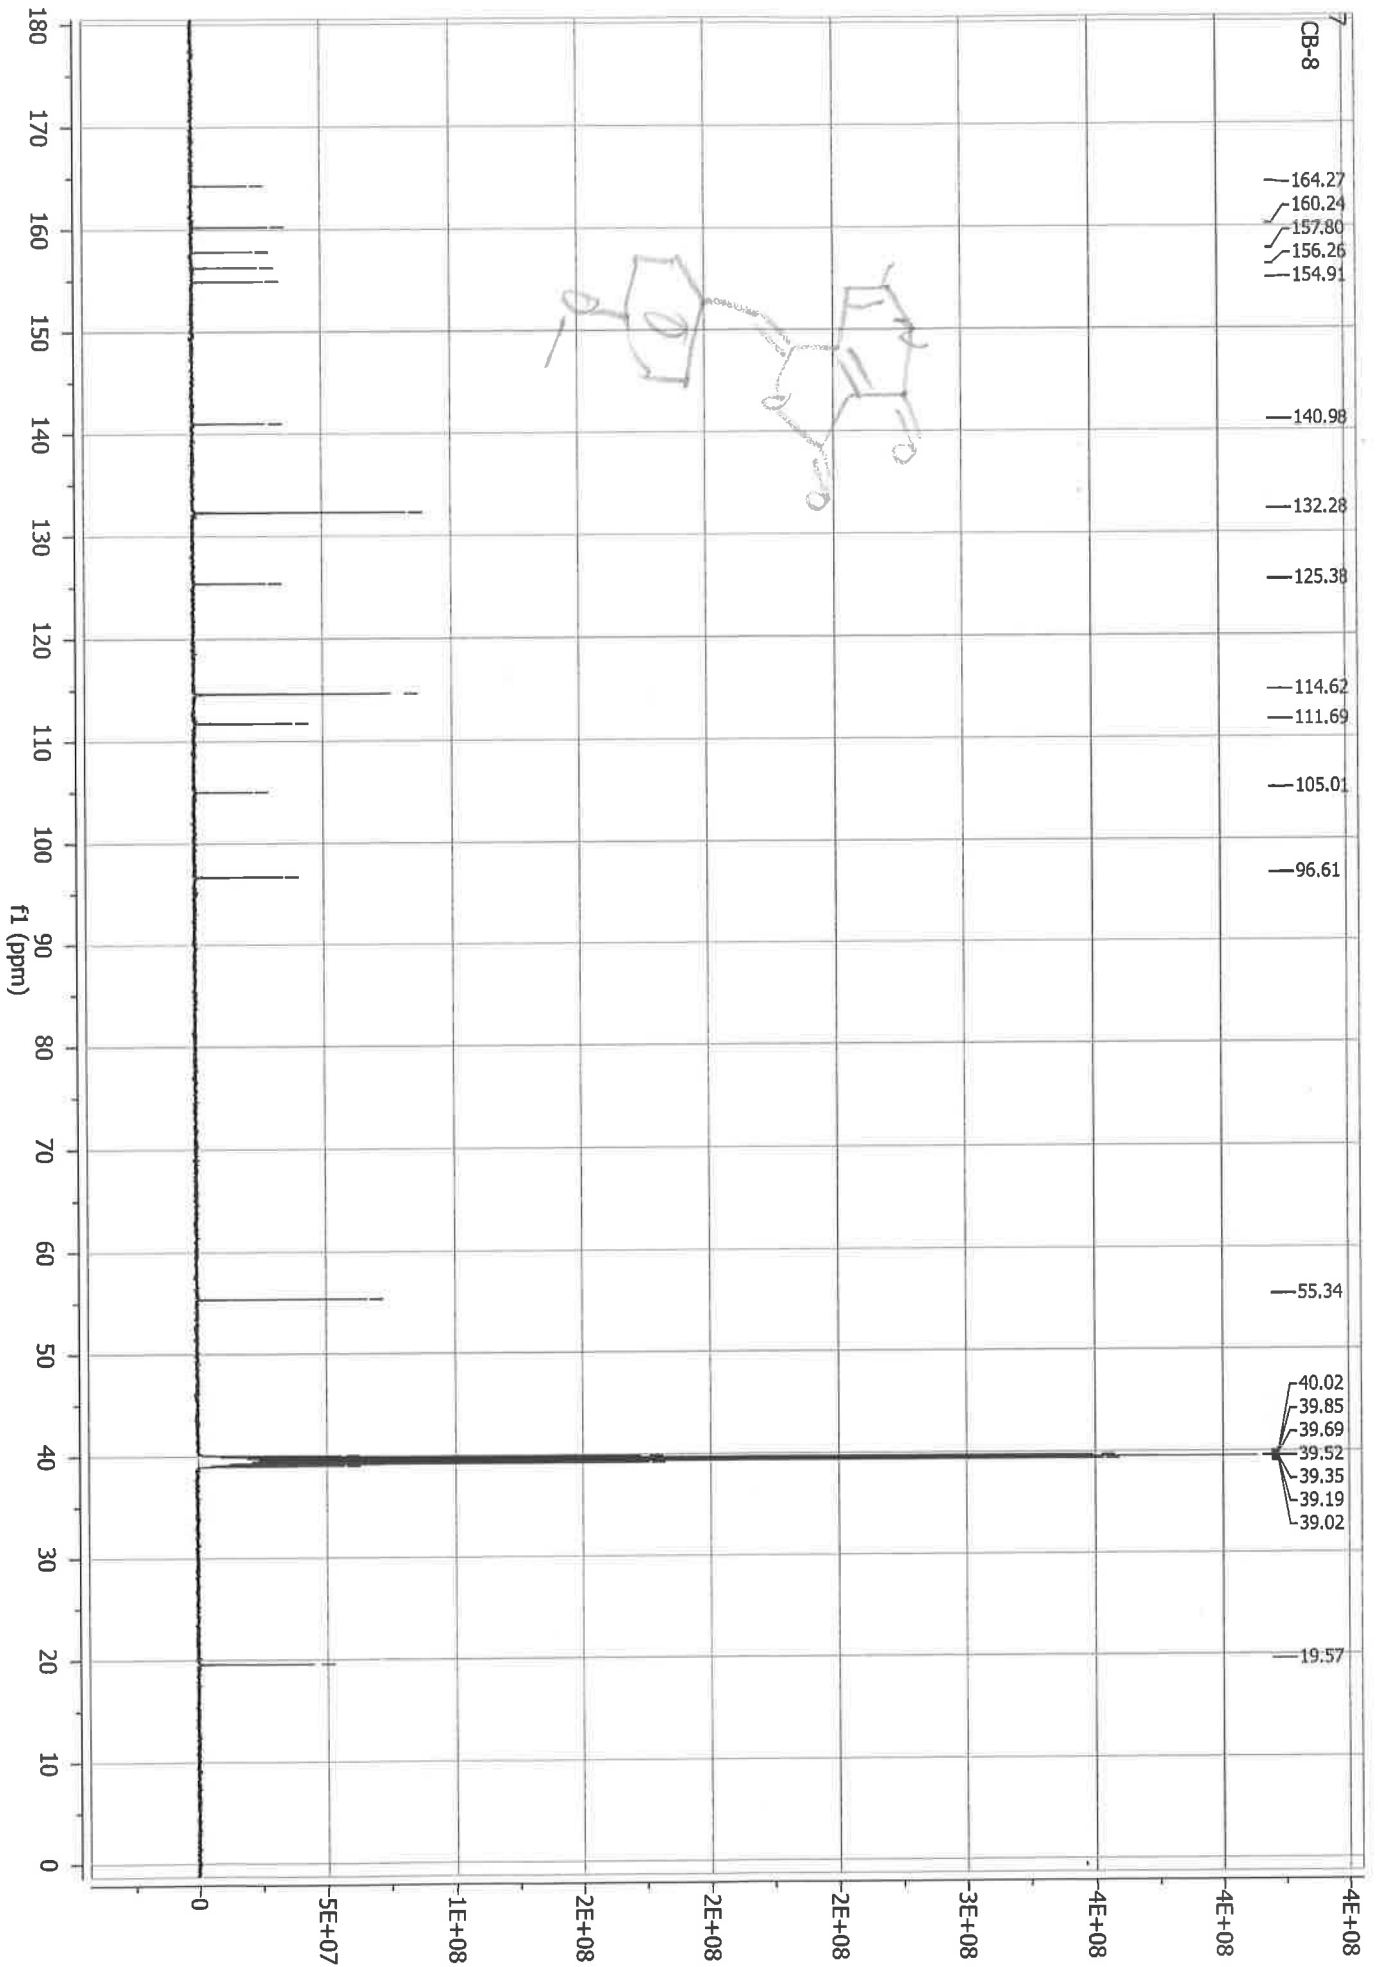

Compound 20

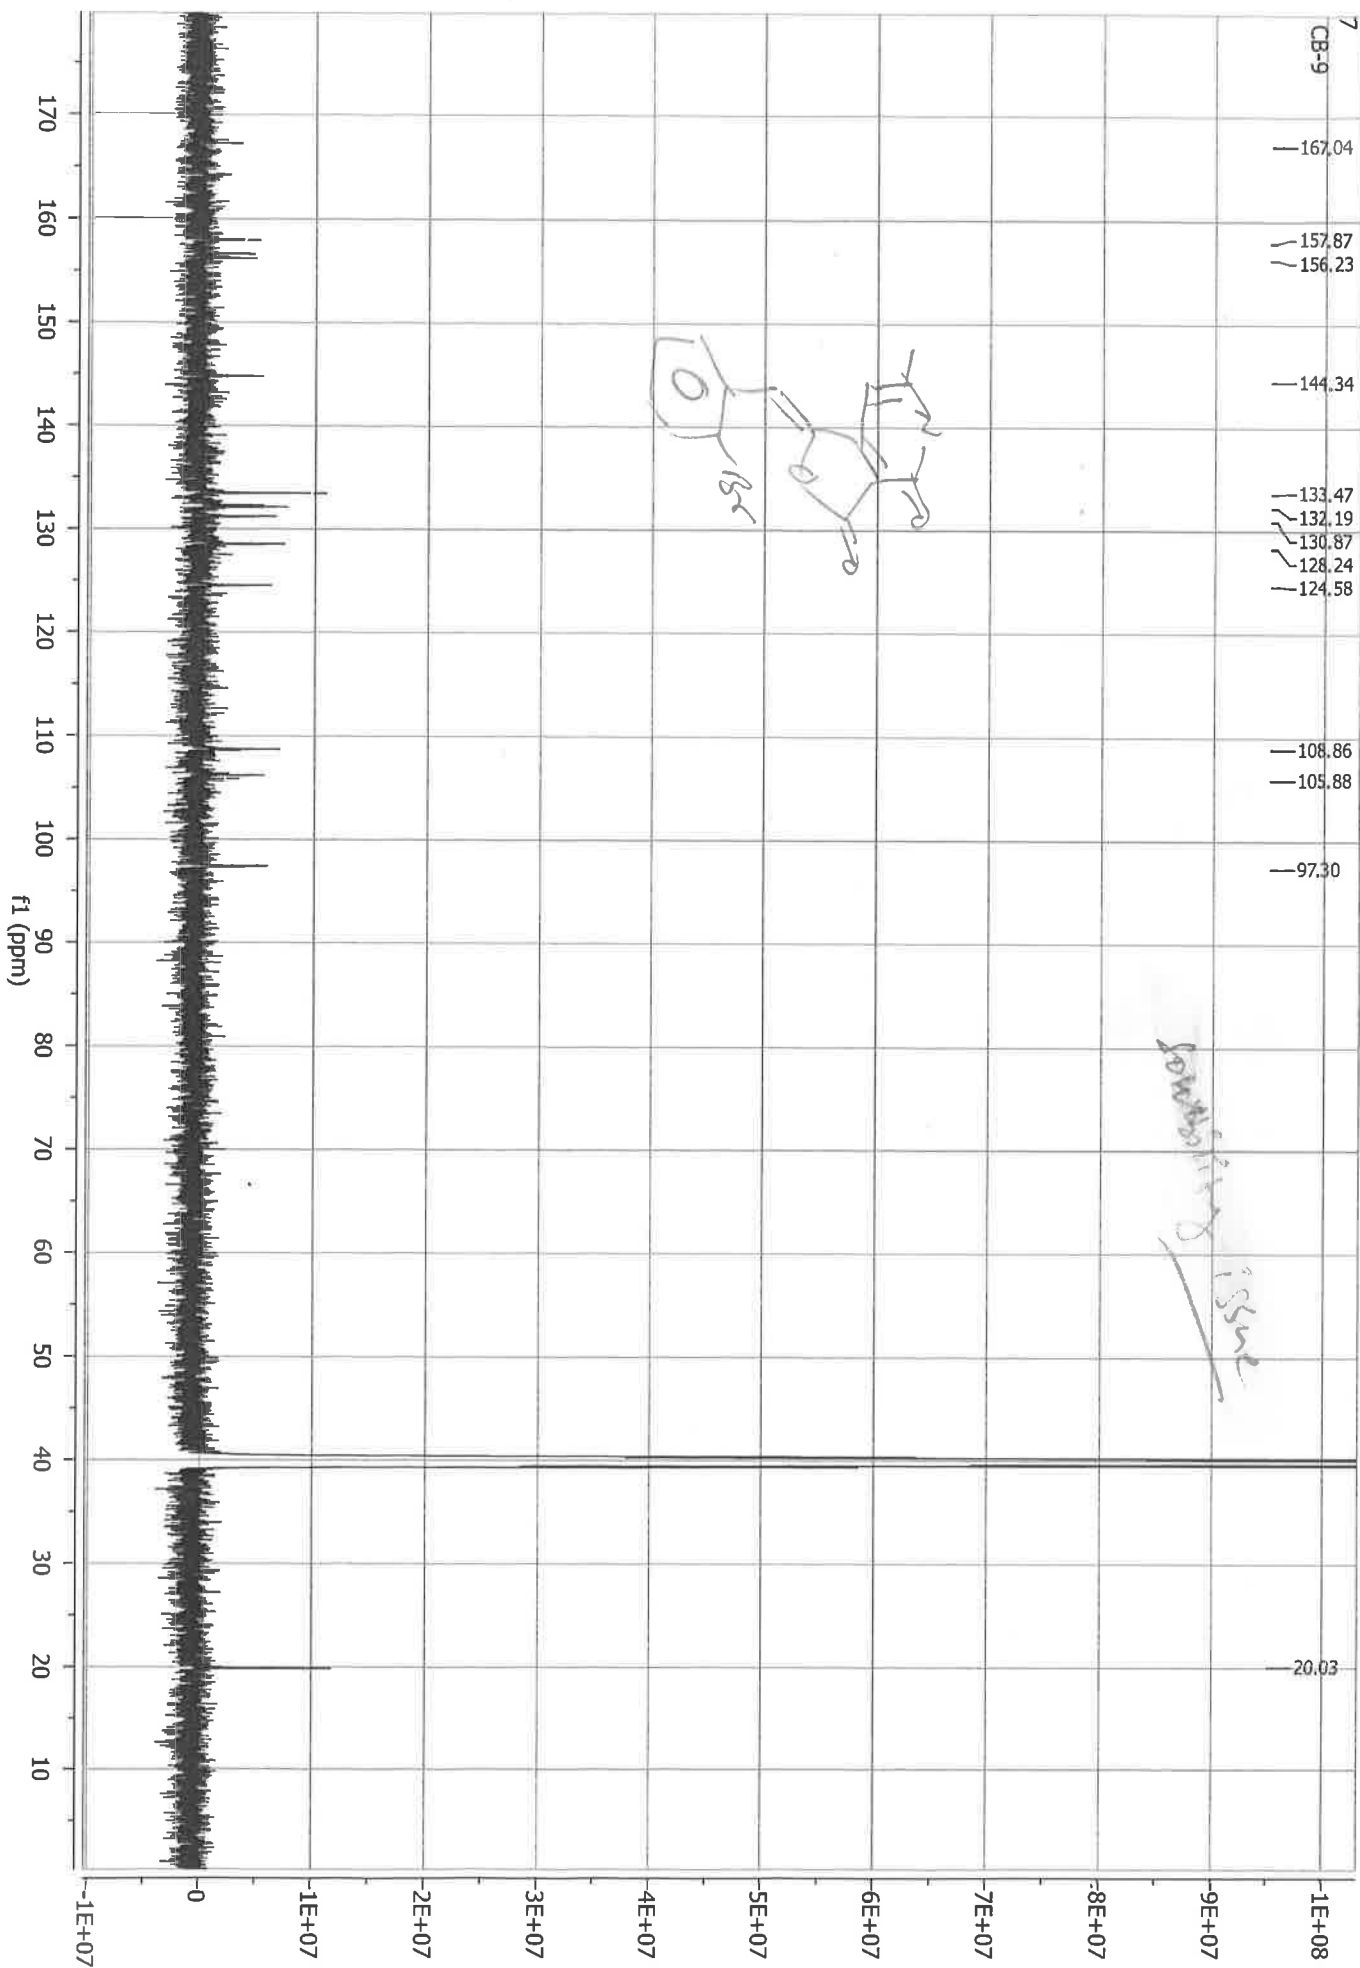

Compound 21

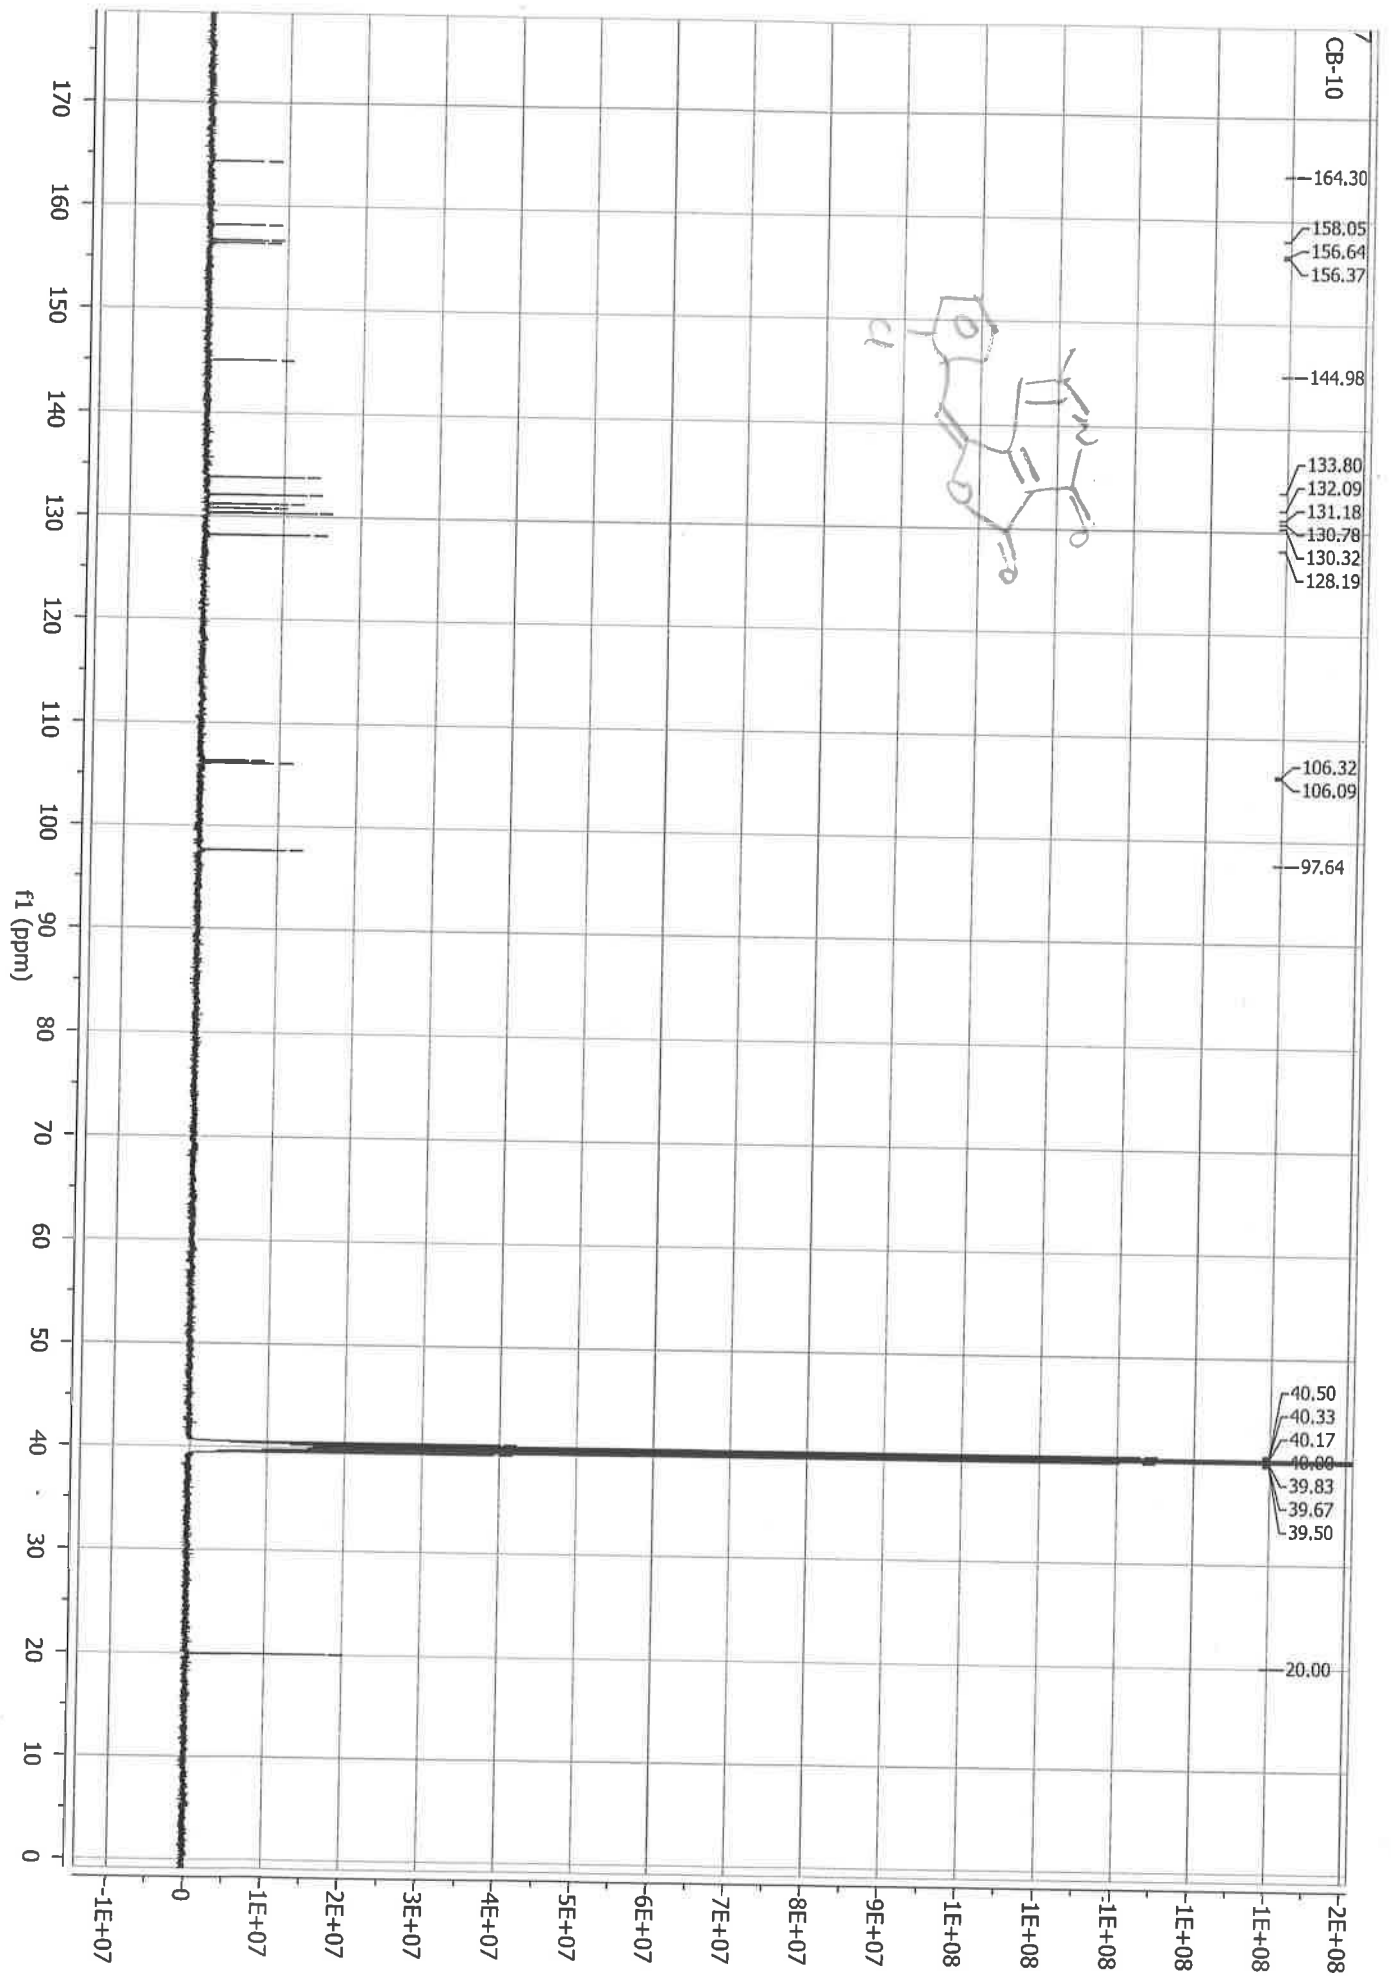

Supplement: srep26603-s1.pdf [file srep26603-s1.pdf]
